# Supplementary material for: Genome Study of a Novel Virulent Phage vB_SspS_KASIA and Mu-like Prophages of Shewanella sp. M16 Provides Insights into the Genetic Diversity of the Shewanella Virome
Source: Int J Mol Sci. 2021 Oct 14;22(20):11070. doi: 10.3390/ijms222011070 (PMC8541194; doi:10.3390/ijms222011070)
Supplement: Supplementary file 1 [file ijms-22-11070-s001.zip › Supplementary Tables.xlsx]

## Sheet: Table S1
Table S1. Characterization of the annotated Shewanella and Caudovirales phage genomes available in the NCBI Viral RefSeq database.
Phage name	Size (bp)	Atcc. No.	CDS	number of tRNA	Temperate/lytic	Family	Place of phage isolation	Host name	Place of host isolation	Ref.
Shewanella phage 1/4	133824	NC_025436	235	3	L	Myoviridae	Baltic Sea ice, Finland	Shewanella sp. 4	Baltic Sea ice, Finland	[1]
Shewanella phage 1/40	139004	NC_025470	236	3	L	Myoviridae	Baltic Sea ice, Finland	Shewanella sp. 40	Baltic Sea ice, Finland	[1]
Shewanella phage 1/41	43510	NC_025458	69	0	L	Myoviridae	Baltic Sea ice, Finland	Shewanella sp. 41	Baltic Sea ice, Finland	[1]
Shewanella phage 1/44	49640	NC_025463	75	0	L	Siphoviridae	Baltic Sea ice, Finland	Shewanella sp. 44	Baltic Sea ice, Finland	[1]
Shewanella phage 4/39	40161	NC_025466	70	0	L	Siphoviridae	Baltic Sea ice, Finland	Shewanella sp. 49	Baltic Sea ice, Finland	[1]
Shewanella phage KASIA	91102	MZ568826	145	0	L	Siphoviridae	gold and arsenic mine, Zloty Stok, Poland	Shewanella sp. M16	gold and arsenic mine, Zloty Stok, Poland	this study
Shewanella phage MuM16-1	37883	MZ568827	52	0	T	Siphoviridae	gold and arsenic mine, Zloty Stok, Poland	Shewanella sp. M16	gold and arsenic mine, Zloty Stok, Poland	this study
Shewanella phage MuM16-2	33702	MZ568828	50	0	T	Myoviridae	gold and arsenic mine, Zloty Stok, Poland	Shewanella sp. M16	gold and arsenic mine, Zloty Stok, Poland	this study
Shewanella phage M16-3	40166	MZ568829	64	0	T	Myoviridae	gold and arsenic mine, Zloty Stok, Poland	Shewanella sp. M16	gold and arsenic mine, Zloty Stok, Poland	this study
Shewanella phage S0112	62286	MK675901	102	0	L	Siphoviridae	coastal sediments of the Yellow Sea, China	Shewanella indica KJW27	coastal sediments of the Arabian Sea	[2]
Shewanella phage SFCi1	42279	KX196154	40	0	L	Myoviridae	seawater, Mission Bay, San Diego, USA	Shewanella fidelis strain 3313	gut microbiome of Ciona intestinalis	[3]
Shewanella phage Spp001	54791	NC_023594	67	0	L	Myoviridae	sewage, Nanshan market, Qingdao, China	Shewanella putrefaciens Sp225	specific spoilage organism for Paralichthys olivaceus	[4]
Shewanella phage SppYZU01	43567	KY622015	49	0	L	Myoviridae	wastewater of a seafood market in Yangzhou, China	Shewanella baltica strains SYZU01	spoiled fillets of fish, Jiangsu, China	[5]
Shewanella phage SppYZU05	54319	KY709296	65	0	L	Chaseviridae	wastewater of a seafood market in Yangzhou, China	Shewanella putrefaciens strains SYZU05	spoiled fillets of fish, Jiangsu, China	[5]
Shewanella phage Thanatos-1	160584	MT457552	206	2	L	Myoviridae	water, Biebertal, Germany	Shewanella oneidensis MR-1	sediments, Oneida Lake, New York, USA	[6]
Shewanella phage Thanatos-2	155580	MT457553	193	2	L	Myoviridae	water, Biebertal, Germany	Shewanella oneidensis MR-1	sediments, Oneida Lake, New York, USA	[6]
Shewanella phage X14	36515	MK796797	39	0	L	Podoviridae	China	Shewanella inventionis KX27	deep sea sediment of the Okinawa Trough	Unpublished
Vibrio phage 1.049.O._10N.286.54.B5	45021	MG592431	60	0	L	Siphoviridae	seawater, Canoe Cov, Nahant, Massachusetts, USA	Shewanella sp.	seawater, Canoe Cov, Nahant, Massachusetts, USA	[7,8]
Vibrio phage 1.050.O._10N.286.48.A6	45285	MG592432	60	0	L	Siphoviridae	seawater, Canoe Cov, Nahant, Massachusetts, USA	Shewanella sp.	seawater, Canoe Cov, Nahant, Massachusetts, USA	[7,8]
Vibrio phage 1.076.O._10N.286.51.B7	47914	MG592452	73	1	L	Siphoviridae	seawater, Canoe Cov, Nahant, Massachusetts, USA	Shewanella sp.	seawater, Canoe Cov, Nahant, Massachusetts, USA	[7,8]
Vibrio phage 1.081.O._10N.286.52.C2	239318	MG592456	354	23	L	Myoviridae	seawater, Canoe Cov, Nahant, Massachusetts, USA	Shewanella sp.	seawater, Canoe Cov, Nahant, Massachusetts, USA	[7,8]
Vibrio phage 1.083.O._10N.286.52.B9	45120	MG592458	61	0	L	Siphoviridae	seawater, Canoe Cov, Nahant, Massachusetts, USA	Shewanella sp.	seawater, Canoe Cov, Nahant, Massachusetts, USA	[7,8]
Vibrio phage 2.096.O._10N.286.48.B5	45120	MG592666	57	0	L	Siphoviridae	seawater, Canoe Cov, Nahant, Massachusetts, USA	Shewanella sp.	seawater, Canoe Cov, Nahant, Massachusetts, USA	[7,8]

## Sheet: Table S2
Table S2. Genes located within the vB_SspS_KASIA phage and the comparison of the KASIA phage-encoded proteins with Colwellia phage 9A using BlastP (1e-5 e-value and 75% query coverage per HSP thresholds). Proteins identified by mass spectrometry are bolded.
ORF no.	Coding region (bp)	Protein size (aa)	Strand	Possible function	Collweliaphage 9A protein	% identity	e-value	% query coverage
KASIA_p001	421-582	53	-	hypothetical protein
KASIA_p002	585-932	115	-	hypothetical protein
KASIA_p003	1008-1496	162	-	hypothetical protein
KASIA_p004	1498-1674	58	-	DNA-binding protein
KASIA_p005	1743-2465	240	-	hypothetical protein
KASIA_p006	2544-2786	80	-	hypothetical protein
KASIA_p007	2946-3188	80	-	hypothetical protein
KASIA_p008	3869-4057	62	-	hypothetical protein
KASIA_p009	4084-4299	71	-	hypothetical protein
KASIA_p010	4369-5118	249	-	hypothetical protein
KASIA_p011	5131-5331	66	-	hypothetical protein
KASIA_p012	5404-6075	223	-	hypothetical protein
KASIA_p013	6080-6610	176	-	hypothetical protein
KASIA_p014	7435-7737	100	-	hypothetical protein
KASIA_p015	7822-8022	66	-	hypothetical protein
KASIA_p016	8027-8260	77	-	hypothetical protein
KASIA_p017	8257-8613	118	-	hypothetical protein
KASIA_p018	8623-9039	138	-	hypothetical protein
KASIA_p019	9118-9312	64	-	hypothetical protein
KASIA_p020	9373-9741	122	-	hypothetical protein
KASIA_p021	9768-9995	75	-	hypothetical protein
KASIA_p022	9995-10246	83	-	hypothetical protein
KASIA_p023	10246-11049	267	-	hypothetical protein
KASIA_p024	11060-11371	103	-	hypothetical protein
KASIA_p025	11364-11582	72	-	hypothetical protein
KASIA_p026	11634-11762	42	-	hypothetical protein
KASIA_p027	11787-11876	29	-	hypothetical protein
KASIA_p028	11873-12223	116	-	hypothetical protein
KASIA_p029	12223-12442	72	-	hypothetical protein
KASIA_p030	12454-12663	69	-	hypothetical protein
KASIA_p031	12744-13154	136	-	RNA chaperon, FinO-like protein
KASIA_p032	13170-13339	55	-	hypothetical protein
KASIA_p033	13340-13489	49	-	hypothetical protein
KASIA_p034	13498-14007	169	-	N-terminal signal sequence containing protein
KASIA_p035	14144-14398	84	+	KTSC domain-containing protein
KASIA_p036	14454-14852	132	+	hypothetical protein
KASIA_p037	14836-15063	75	+	hypothetical protein
KASIA_p038	15067-15360	97	+	KTSC domain-containing protein	YP_006489209.1	37	1.12e-10	81
KASIA_p039	15363-15572	69	+	hypothetical protein
KASIA_p040	15569-16084	171	+	hypothetical protein
KASIA_p041	16078-16395	105	+	thioredoxin-like protein
KASIA_p042	16395-17351	318	+	thymidylate synthase
KASIA_p043	17442-17744	100	+	hypothetical protein
KASIA_p044	17728-18336	202	+	polynucleotide kinase/phosphorylase
KASIA_p045	18333-18842	169	+	hypothetical protein
KASIA_p046	18846-19499	217	+	hypothetical protein	YP_006489219.1	29	6.62e-15	76
KASIA_p047	19512-19685	57	+	RNA polymerase inhibitor
KASIA_p048	19722-21026	434	+	AAA family ATPase	YP_006489220.1	43	1.31e-122	100
KASIA_p049	21088-21393	101	+	hypothetical protein
KASIA_p050	21390-21587	65	+	hypothetical protein
KASIA_p051	21584-21781	65	+	hypothetical protein
KASIA_p052	21800-22747	315	+	tRNA nucleotidyltransferase
KASIA_p053	22813-23319	168	+	SLT transglycosylase	YP_006489225.1	48	1.46e-46	95
KASIA_p054	23320-23457	45	+	hypothetical protein
KASIA_p055	23514-23765	83	+	hypothetical protein
KASIA_p056	23810-24115	101	-	hypothetical protein
KASIA_p057	24115-24366	87	-	spanin, outer lipoprotein subunit; lipoprotein signal peptide
KASIA_p058	24281-24661	126	-	transmembrane helix containing protein
KASIA_p059	24642-24872	76	-	two-transmembrane helix containing protein
KASIA_p060	24875-25270	131	-	L-alanyl-D-glutamate peptidase, endolysin
KASIA_p061	25320-25583	87	-	transmembrane helix containing protein
KASIA_p062	25632-26126	164	-	four-transmembrane helix and N-terminal signal sequence containing protein
KASIA_p063	26129-26224	31	-	hypothetical protein
KASIA_p064	26247-26852	201	-	virion-associated protein
KASIA_p065	26862-27239	125	-	virion-associated protein	YP_006489233.1	42	9.05e-28	98
KASIA_p066	27350-29251	633	-	tail spike protein, putative depolymerase
KASIA_p067	29265-33662	1465	-	tail protein	YP_006489239.1	44	0	90
KASIA_p068	33664-34185	173	-	tail assembly protein	YP_006489240.1	62	1.09e-63	94
KASIA_p069	34163-34507	114	-	tail component protein	YP_006489241.1	50	7.71e-32	89
KASIA_p070	34509-35084	191	-	minor tail protein	YP_006489242.1	62	1.01e-89	98
KASIA_p071	35100-35501	133	-	minor tail protein	YP_006489243.1	55	7.11e-52	97
KASIA_p072	35518-35685	55	-	hypothetical protein
KASIA_p073	35785-39369	1194	-	tail tape measure protein
KASIA_p074	39373-39696	107	-	minor tail protein	YP_006489245.1	58	4.18e-43	94
KASIA_p075	39699-40181	160	-	hypothetical protein	YP_006489246.1	41	1.17e-35	96
KASIA_p076	40193-40609	138	-	tail protein	YP_006489247.1	52	7.89e-39	90
KASIA_p077	40614-41858	414	-	tail tube protein	YP_006489248.1	53	3.11e-158	98
KASIA_p078	41872-42372	166	-	virion-associated protein	YP_006489249.1	40	4.04e-41	99
KASIA_p079	42373-42756	127	-	hypothetical protein	YP_006489250.1	34	2.39e-19	100
KASIA_p080	42746-43510	254	-	virion-associated protein	YP_006489251.1	45	1.34e-65	100
KASIA_p081	43525-43995	156	-	hypothetical protein	YP_006489252.1	49	2.22e-50	96
KASIA_p082	44064-45167	367	-	major capsid protein	YP_006489253.1	64	0	99
KASIA_p083	45223-46398	391	-	hypothetical protein	YP_006489254.1	42	1.13e-88	99
KASIA_p084	46395-46799	134	-	phage serine protease	YP_006489255.1	71	3.8e-70	97
KASIA_p085	46811-47113	100	-	hypothetical protein	YP_006489256.1	60	6.36e-44	100
KASIA_p086	47116-48633	505	-	portal protein	YP_006489257.1	66	0	97
KASIA_p087	49059-49160	33	-	hypothetical protein
KASIA_p088	49245-49463, 50728-51821, 52152-52419	526	-	terminase large subunit	YP_006489258.1	65	0	96
KASIA_p089	49490-50370	293	-	HNH endonuclease
KASIA_p090	52420-53138	238	-	hypothetical protein	YP_006489259.1	40	1.44e-39	80
KASIA_p091	53445-53603	52	-	hypothetical protein
KASIA_p092	53617-54966	449	-	hypothetical protein
KASIA_p093	55167-55364	65	-	hypothetical protein
KASIA_p094	55365-56627	420	-	AAA ATPase
KASIA_p095	56715-57104	129	-	hypothetical protein	YP_006489260.1	33	3.48e-17	88
KASIA_p096	57134-59773	879	-	RNA polymerase	YP_006489261.1	52	0	98
KASIA_p097	60000-61898	632	+	DNA primase	YP_006489262.1	58	0	99
KASIA_p098	61879-63159	426	+	DNA helicase	YP_006489263.1	52	2.72e-153	99
KASIA_p099	63169-63495	108	+	oligoribonuclease
KASIA_p100	63530-65275, 66538-67080, 67363-67722	882	+	DNA polymerase I	YP_006489264.1	54	0	99
KASIA_p101	65656-66354	232	+	HNH endonuclease
KASIA_p102	67775-68776	333	+	hypothetical protein	YP_006489265.1	34	8.23e-44	96
KASIA_p103	68773-69090	105	+	hypothetical protein
KASIA_p104	69150-70562	470	+	5'-3' exonuclease, Rnase H	YP_006489266.1	62	0	99
KASIA_p105	70559-71272	237	+	RuvC resolvase	YP_006489267.1	48	2.33e-64	87
KASIA_p106	71283-72944	553	+	A1 protein
KASIA_p107	72941-73414	157	+	hypothetical protein
KASIA_p108	73506-75749	747	+	ribonucleoside-diphosphate reductase subunit alpha	YP_006489268.1	31	1.65e-127	99
KASIA_p109	75785-76888	367	+	ribonucleoside-diphosphate reductase small chain	YP_006489269.1	29	2.27e-47	94
KASIA_p110	76956-77234	92	+	hypothetical protein
KASIA_p111	77282-77779	165	+	nucleoside triphosphate pyrophosphohydrolase	YP_006489270.1	49	1.96e-43	90
KASIA_p112	77791-78303	170	+	deoxynucleoside monophosphate kinase
KASIA_p113	78303-78956	217	+	DNA binding protein
KASIA_p114	78931-79779	282	+	DNA adenine methyltransferase	YP_006489274.1	38	7.96e-59	96
KASIA_p115	79789-81210	473	+	DNA ligase	YP_006489275.1	52	2.35e-168	100
KASIA_p116	81194-81340	48	+	hypothetical protein
KASIA_p117	81340-81702	120	+	hypothetical protein
KASIA_p118	81703-82260	185	+	hypothetical protein	YP_006489278.1	40	1.29e-43	90
KASIA_p119	82253-82783	176	+	hypothetical protein
KASIA_p120	82783-83469	228	+	hypothetical protein	YP_006489279.1	42	1.34e-70	96
KASIA_p121	83486-83707	73	+	hypothetical protein
KASIA_p122	83721-83927	68	+	hypothetical protein
KASIA_p123	83927-84412	161	+	hypothetical protein	YP_006489280.1	46	2.25e-54	97
KASIA_p124	84492-84794	100	+	hypothetical protein
KASIA_p125	84781-85050	89	+	hypothetical protein
KASIA_p126	85047-85271	74	+	hypothetical protein
KASIA_p127	85273-85554	93	+	glutaredoxin
KASIA_p128	85535-85816	93	+	DUF3850 domain-containing protein	YP_006489283.1	43	2.09e-23	99
KASIA_p129	85800-85979	59	+	hypothetical protein
KASIA_p130	85981-86355	124	+	hypothetical protein
KASIA_p131	86357-86827	156	+	hypothetical protein
KASIA_p132	86829-87047	72	+	hypothetical protein
KASIA_p133	87051-87611	186	+	hypothetical protein	YP_006489290.1	40	4.41e-34	99
KASIA_p134	87612-87781	55	+	hypothetical protein
KASIA_p135	87803-88243	146	+	hypothetical protein
KASIA_p136	88245-88493	82	+	hypothetical protein	YP_006489298.1	34	2.67e-06	87
KASIA_p137	88506-88667	53	+	hypothetical protein
KASIA_p138	88760-88876	38	+	hypothetical protein
KASIA_p139	88887-89111	74	+	hypothetical protein
KASIA_p140	89104-89334	76	+	hypothetical protein
KASIA_p141	89336-89509	57	+	hypothetical protein
KASIA_p142	89502-89666	54	+	hypothetical protein
KASIA_p143	89659-90147	162	+	hypothetical protein	YP_006489310.1	43	1.93e-37	87
KASIA_p144	90192-90542	116	+	hypothetical protein
KASIA_p145	90596-90868	90	+	hypothetical protein

## Sheet: Table S3
Table S3. Genes located within the vB_SspS_MuM16-1 phage. Proteins identified by mass spectrometry are bolded.
ORF no.	Coding region (bp)	Protein size (aa)	Strand	Possible function
p01	183-827	214	-	phage repressor protein CI
p02	1071-1319	82	+	Mu phage regulator Ner
p03	974-1093	39	-	hypothetical protein
p04	1312-3471	719	+	DDE_type integrase/transposase, Mup03
p05	3542-4261	239	+	phage replication initiation ATPase, Mup04
p06	4317-4883	188	+	helix-turn-helix domain-containing protein
p07	4870-5364	164	+	helix-turn-helix domain-containing protein
p08	5364-5582	72	+	hypothetical protein
p09	5584-6219	211	+	hypothetical protein
p10	6239-6547	102	+	hypothetical protein
p11	6639-6860	73	+	hypothetical protein
p12	6854-7474	206	+	regulatory protein Gem A, Mup16
p13	7467-7922	151	+	regulator of late transcription protein C, Mup21
p14	8080-8352	90	+	hypothetical protein
p15	8429-9337	302	+	serine protease
p16	9381-9938	185	+	hypothetical protein
p17	9967-10401	144	+	hypothetical protein
p18	10486-10794	102	+	phage protein, Mup18
p19	10784-11344	186	+	phage lysozyme R (EC 3.2.1.17)
p20	11341-11910	189	+	spanin
p21	11891-11986	31	+	hypothetical protein
p22	11995-12219	74	+	hypothetical protein
p23	12216-12554	112	+	phage protein, Mup25
p24	12554-12850	98	+	transcriptional regulator, Mup26
p25	12853-13125	90	+	hypothetical protein
p26	13115-13684	189	+	terminase small subunit, Mup27
p27	13684-15324	546	+	terminase large subunit, Mup28
p28	15324-16925	533	+	portal protein, Mup29
p29	16918-18243	441	+	phage virion morphogenesis protein, Mup30
p30	18253-18714	153	+	phage virion morphogenesis protein, Mup31
p31	19551-18697	284	-	two helix-containing protein
p32	20281-20592	103	+	transcriptional regulator
p33	20567-21523	318	+	RNA-directed DNA polymerase
p34	21530-21634	34	+	hypothetical protein
p35	21644-21970	108	+	hypothetical protein
p36	22050-23207	385	+	phage protease, Mup32
p37	23207-24127	306	+	phage major head subunit Mup34
p38	24108-24197	29	+	hypothetical protein
p39	24210-24722	170	+	Mu-like prophage FluMu protein gp35
p40	24725-25165	146	+	phage protein Mup36
p41	25165-25608	147	+	phage protein Mup37
p42	25637-26383	248	+	major tail protein
p43	26503-30429	1308	+	phage tape measure protein Mup42
p44	30426-30791	121	+	hypothetical protein
p45	30804-33278	824	+	virion-associated protein
p46	33290-34249	319	+	virion-associated protein
p47	34242-34544	100	+	hypothetical protein
p48	34541-36328	595	+	tail protein
p49	36325-36546	73	+	hypothetical protein
p50	36692-37453	253	+	DNA adenine methyltransferase (EC 2.1.1.72)
p51	37476-37577	33	+	hypothetical protein
p52	37628-37804	58	+	nucleic acid-binding protein, contains C4-type Zn-ribbon domain

## Sheet:  Table S4
Table S4. Genes located within the vB_SspM_MuM16-2 phage.
ORF no.	Coding region (bp)	Protein size (aa)	Strand	Possible function
p01	1-735	244	-	transcriptional regulator, CI
p02	909-1133	74	+	transcriptional regulator, Ner family
p03	1138-3147	669	+	DDE transposase
p04	3181-4125	314	+	DNA transposition protein, AAA+ family ATPase
p05	4273-4488	71	+	hypothetical protein
p06	4490-4711	73	+	hypothetical protein
p07	4708-5028	106	+	hypothetical protein
p08	5044-5259	71	+	hypothetical protein
p09	5252-5866	204	+	DUF3164 family protein
p10	6137-6373	78	+	hypothetical protein
p11	6357-6539	60	+	hypothetical protein
p12	6532-7203	223	+	DUF2786 domain-containing protein
p13	7288-7581	97	+	hypothetical protein
p14	7619-7873	84	+	hypothetical protein
p15	7883-8137	84	+	hypothetical protein
p16	8146-8490	114	+	hypothetical protein
p17	8501-9040	179	+	Mu-like prophage protein gp16
p18	9117-9548	143	+	Middle operon regulator, Mor
p19	9556-10005	149	+	hypothetical protein
p20	10084-10668	194	+	lysozyme
p21	10669-10929	86	+	hypothetical protein
p22	10914-11522	202	+	hypothetical protein
p23	11522-11737	71	+	TraR/DksA family transcriptional regulator
p24	11737-12039	100	+	hypothetical protein
p25	12048-12338	96	+	hypothetical protein
p26	12348-12941	197	+	Mu-like prophage protein gp27, terminase small
p27	12941-13087	48	+	hypothetical protein
p28	13077-14735	552	+	Mu-like prophage protein gp28, terminase large
p29	14732-16297	521	+	Mu-like prophage protein gp29, portal protein
p30	16290-17069	259	+	minor capsid protein
p31	17412-18374	320	+	Mu-like prophage protein gp32, protease I
p32	18374-19273	299	+	Mu-like prophage protein gpT, major head
p33	19337-19594	85	+	hypothetical protein
p34	19597-20133	178	+	hypothetical protein
p35	20172-20807	211	+	Mu-like prophage protein gp35
p36	20821-21252	143	+	Mu-like prophage protein gp36, DUF1320
p37	21252-21794	180	+	Mu-like prophage protein gpG, virion
p38	21791-22384	197	+	Mu-like prophage protein gp37
p39	22435-22608	57	+	Mu-like prophage protein gp38, DUF2635
p40	22623-24104	493	+	Mu-like prophage protein gpL, tail sheath
p41	24121-24477	118	+	tail tube protein
p42	24477-24821	114	+	Mu-like prophage protein gp41, tail assembly
p43	24947-26686	579	+	tape measure protein
p44	26708-28024	438	+	Mu-like prophage DNA circulation protein
p45	28024-29106	360	+	Mu-like prophage gpP protein, tail protein
p46	29100-29747	215	+	Mu-like prophage protein gp45, baseplate
p47	29755-30207	150	+	Mu-like prophage protein gp46, baseplate
p48	30197-31264	355	+	Mu-like prophage protein gp47, baseplate
p49	31249-31833	194	+	tail protein
p50	31900-33702	600	+	SGNH/GDSL hydrolase family protein, tail fiber protein

## Sheet:  Table S5
Table S5. Genes located within the vB_SspM_M16-3 phage.
ORF no.	Coding region (bp)	Protein size (aa)	Strand	Possible function
p01	200-1273	357	+	phage integrase
p02	1338-1598	86	-	ogr/Delta-like zinc finger protein
p03	2144-2320	58	-	hypothetical protein
p04	2401-3510	369	-	phage late control protein, D family
p05	3507-3956	149	-	P2 GpU-like tail assembly protein
p06	3972-7622	1216	-	tail tape measure protein
p07	7615-7746	43	-	phage tail protein, GpE family
p08	7755-8084	109	-	tail assembly chaperone protein
p09	8221-8736	171	-	phage major tail tube protein
p10	8746-9915	389	-	tail sheath protein
p11	10034-10237	67	-	tail assembly chaperone protein
p12	10237-10947	236	-	hypothetical protein
p13	10950-11480	176	-	phage tail protein
p14	11480-12223	247	-	phage tail protein
p15	12225-13154	309	-	baseplate assembly protein J
p16	13147-13503	118	-	baseplate assembly protein W
p17	13500-14138	212	-	baseplate assembly protein V
p18	14664-14894	76	+	hypothetical protein
p19	15089-15394	101	+	hypothetical protein
p20	15535-15714	59	+	two-transmembrane helix containing protein
p21	15835-16230	131	+	four-transmembrane helix containing protein
p22	16376-16921	181	+	hypothetical protein
p23	17077-17559	160	-	virion morphogenesis protein
p24	17541-18014	157	-	phage tail protein
p25	18007-18315	102	-	Rz1-like lysis system protein LysC
p26	18158-18622	154	-	Rz-like lysis system protein LysB
p27	18606-19427	273	-	N-acetylmuramidase, endolysisn
p28	19433-19753	106	-	three-transmembrane-domains containing protein
p29	19753-20130	125	-	three-transmembrane-domains containing protein
p30	20133-20351	72	-	tail protein X
p31	20365-20826	153	-	head completion protein
p32	20928-21632	234	-	small terminase subunit protein
p33	21635-22639	334	-	major capsid protein, P2 family
p34	22649-23458	269	-	capsid scaffolding protein, GPO family
p35	23611-25380	589	+	terminase ATPase subunit
p36	25380-26426	348	+	portal protein
p37	26392-26655	87	+	hypothetical protein
p38	26850-27461	203	-	hypothetical protein
p39	27576-27671	31	-	hypothetical protein
p40	27668-29953	761	-	replication endonuclease
p41	29950-30267	105	-	hypothetical protein
p42	30330-30569	79	-	hypothetical protein
p43	30566-30835	89	-	transcriptional regulator
p44	30838-31077	79	-	hypothetical protein
p45	31092-31448	118	-	hypothetical protein
p46	31485-31682	65	-	hypothetical protein
p47	31720-31983	87	-	Cox protein, pyocin activator, PrtN family
p48	31980-32213	77	-	helix-turn-helix domain-containing protein
p49	32402-33016	204	+	CI-like repressor
p50	33277-33564	95	-	hypothetical protein
p51	33654-34094	146	-	hypothetical protein
p52	34214-34519	101	-	hypothetical protein
p53	34617-34886	89	-	hypothetical protein
p54	34883-34993	36	-	hypothetical protein
p55	34977-35264	95	-	hypothetical protein
p56	35357-35773	138	-	hypothetical protein
p57	35897-36076	59	-	hypothetical protein
p58	36192-36431	79	-	hypothetical protein
p59	36439-36588	49	-	hypothetical protein
p60	36717-36947	76	-	DUF4926 domain-containing protein
p61	37066-37413	115	-	hypothetical protein
p62	37487-37948	153	-	hypothetical protein
p63	37971-38579	202	-	hypothetical protein
p64	38888-39847	319	+	integron integrase IntI2

## Sheet: Table S6
Table S6. The comparison of vB_SspS_KASIA proteins with other phages using phmmer (1e-5 e-value thresholds). Hits over the thresholds were colored in blue. Columns summarising the number of proteins resembling sequence similarity between vB_SspS_KASIA and other phages were colored in red scales.
Phage (accession number) \ vB_SspS_KASIA	The number of all proteins resembling sequence similary between two phages	The number of proteins resembling sequence similary within region I	The number of proteins resembling sequence similarity within long non-permuted terminal repeat region (in green)	KASIA_p001_hypothetical_protein	KASIA_p002	KASIA_p003	KASIA_p00_DNA-binding_protein	KASIA_p005	KASIA_p006	KASIA_p007	KASIA_p008	KASIA_p009	KASIA_p010	KASIA_p011	KASIA_p012	KASIA_p013	KASIA_p014	KASIA_p015	KASIA_p016	KASIA_p017	KASIA_p018	KASIA_p019	KASIA_p020	KASIA_p021	KASIA_p022	KASIA_p023	KASIA_p024	KASIA_p025	KASIA_p026	KASIA_p027	KASIA_p028	KASIA_p029	KASIA_p030	KASIA_p031_RNA_chaperon_FinO-like_protein	KASIA_p032	KASIA_p033	KASIA_p034_signal_peptide_transmembrane_region	The number of proteins resembling sequence similary within region II	KASIA_p035_KTSC_domain-containing_protein	KASIA_p036	KASIA_p037	KASIA_p038_KTSC_domain-containing_protein	KASIA_p039	KASIA_p040	KASIA_p041_thioredoxin-like_protein	KASIA_p042_thymidylate_synthase	KASIA_p043	KASIA_p044_polynucleotide_kinase/phosphorylase	KASIA_p045
The number of phages encoding a protein resembling sequence similarity	4476			1	1	293	6	11	0	0	0	1	9	8	0	0	1	0	0	0	4	0	2	0	0	0	1	0	0	2	0	0	0	17	0	0	14		0	21	0	2	0	0	2	294	0	208	0
vB_SspS_KASIA phage-encoded proteins without a significatn hit									1	1	1				1	1		1	1	1		1		1	1	1		1	1		1	1	1		1	1			1		1		1	1			1		1
Colwellia phage 9A (NC_018088)	49	0	0																																			5				5,40E-07						1,40E-27
Aeromonas phage 4_L372D (NC_048771)	14	1	1			5,20E-46																																1
Aeromonas phage 4_L372XY (NC_048772)	13	0	0																																			2								3,80E-54
Aeromonas phage 2-L372D (NC_048769)	13	0	0																																			1
Shewanella sp. phage 1/4 (NC_025436)	12	2	1	7,30E-06																			3,50E-09															2
Pseudoalteromonas phage PH357 (KX822733)	12	1	0																		4,40E-33																	1
Cronobacter phage CR9 (NC_023717)	12	1	1			3,20E-52																																1								3,90E-43
Aeromonas phage 2_L372X (NC_048770)	12	0	0																																			1
Pectobacterium phage phiTE (NC_020201)	12	0	0																																			0
Vibrio phage V07 (MT135025)	11	1	0																																		5,70E-07	1
Vibrio phage 2.058.O._10N.286.46.B8 (MG592662)	11	1	1			1,50E-06																																0
Vibrio phage 3.058.O._10N.286.46.B8 (MG592672)	11	1	1			1,50E-06																																0
Vibrio phage henriette 12B8 (NC_021073)	11	1	1			4,10E-07																																0
Klebsiella phage vB_KaeM_KaOmega (MN013077)	11	0	0																																			1								2,90E-44
Raoultella phage Ro1 (NC_048682)	11	0	0																																			1								8,80E-47
Pectobacterium phage DU_PP_I (MF979560)	11	0	0																																			1								4,90E-43
Pectobacterium phage DU_PP_IV (MF979563)	11	0	0																																			1								4,90E-43
Salmonella phage PVPSE1 (NC_016071)	11	0	0																																			1								3,90E-44
Escherichia phage vB_vPM_PD114 (MH675927)	11	0	0																																			1								1,00E-48
Cronobacter phage PBES 02 (NC_028672)	11	0	0																																			1								4,90E-43
Vibrio phage 11895-B1 (NC_020843)	11	0	0																																			0
Pectobacterium phage vB_PatM_CB7 (KY514263)	11	0	0																																			0
Aeromonas phage ZPAH1 (MW272540)	10	1	0																																		2,50E-06	1
Vibrio phage phi-ST2 (KT919973)	10	1	0																																		8,50E-06	1
Klebsiella phage vB_KpM_FBKp34 (MW394390)	10	0	0																																			2								1,50E-47
Vibrio phage ICP1_2011_A (MH310933)	10	0	0																																			2		3,00E-09						9,30E-54
Shewanella sp. phage 1/40 (NC_025470)	10	0	0																																			2
Vibrio phage ICP1_2012_A (MH310936)	10	0	0																																			2		2,10E-09						1,90E-53
Vibrio phage ICP1_2006_D (HQ641348)	10	0	0																																			2		3,00E-09						1,90E-53
Vibrio phage ICP1_2006_C (HQ641349)	10	0	0																																			2		3,00E-09						1,90E-53
Vibrio phage ICP1_2006_B (HQ641350)	10	0	0																																			2		3,00E-09						9,30E-54
Vibrio phage ICP1_2006_A (HQ641351)	10	0	0																																			2		3,00E-09						9,30E-54
Vibrio phage ICP1_2005_A (HQ641352)	10	0	0																																			2		3,00E-09						2,70E-53
Vibrio phage ICP1_2001_A (HQ641353)	10	0	0																																			2		3,00E-09						9,30E-54
Vibrio phage ICP1_2004_A (HQ641354)	10	0	0																																			2		3,00E-09						9,30E-54
Vibrio phage JSF5 (KY883634)	10	0	0																																			2		3,00E-09						9,30E-54
Vibrio phage JSF6 (KY883635)	10	0	0																																			2		3,00E-09						1,30E-53
Vibrio phage JSF1 (KY883636)	10	0	0																																			2		3,00E-09						2,70E-53
Vibrio phage JSF2 (KY883637)	10	0	0																																			2		3,00E-09						2,70E-53
Vibrio phage JSF13 (KY883638)	10	0	0																																			2		3,00E-09						9,30E-54
Vibrio phage JSF17 (KY883640)	10	0	0																																			2		3,00E-09						9,30E-54
Vibrio phage ICP1_2006_E (MH310934)	10	0	0																																			2		3,00E-09						9,30E-54
Vibrio phage ICP1_2017_F_Mathbaria (MN419153)	10	0	0																																			2		3,00E-09						6,40E-54
Vibrio phage ICP1 (NC_015157)	10	0	0																																			2		3,00E-09						2,70E-53
Vibrio phage JSF14 (KY883639)	10	0	0																																			2		3,50E-09						9,30E-54
Vibrio phage ICP1_2011_B (MH310935)	10	0	0																																			2		3,50E-09						9,30E-54
Vibrio phage JSF4 (KY065147)	10	0	0																																			2		1,60E-08						2,70E-53
Erwinia phage Hena1 (NC_048828)	10	0	0																																			2								1,80E-52
Klebsiella phage KNP2 (NC_048647)	10	0	0																																			1								1,70E-45
Klebsiella phage vB_KpnM_BIS47 (NC_048656)	10	0	0																																			1								9,70E-38
Vibrio phage S4-7 (KX507046)	10	0	0																																			1
Escherichia phage VEcB (NC_052663)	10	0	0																																			1								1,20E-49
Salmonella phage GEC_vB_MG (MW006477)	10	0	0																																			1								6,60E-46
Acinetobacter phage ABPH49 (MH533020)	10	0	0																																			1								1,40E-45
Salmonella phage SSE121 (NC_027351)	10	0	0																																			1								3,90E-44
Klebsiella phage vB_KpnM_Seu621 (MT939253)	10	0	0																																			1								8,80E-50
Klebsiella virus KpS8 (NC_048873)	10	0	0																																			1								8,80E-50
Escherichia phage alia (NC_052655)	10	0	0																																			1								1,50E-49
Escherichia phage arall (MN850584)	10	0	0																																			1								5,00E-49
Enterobacteria phage ECGD1 (KU522583)	10	0	0																																			1								8,70E-49
Escherichia phage vB_EcoM_PHB05 (NC_052652)	10	0	0																																			1								8,70E-49
Escherichia phage vB_vPM_PD06 (NC_052653)	10	0	0																																			1								8,70E-49
Enterobacteria phage phi92 (NC_023693)	10	0	0																																			1								1,00E-48
Proteus phage Mydo (NC_048741)	10	0	0																																			1								8,30E-45
Cronobacter phage CR8 (NC_024354)	10	0	0																																			1								1,60E-44
Cronobacter phage CR3 (NC_017974)	10	0	0																																			1								1,80E-42
Vibrio phage 1.101.O._10N.261.45.C6 (MG592473)	9	1	0																		1,50E-29																	1
Aeromonas phage Aswh_1 (MH791414)	9	1	0																																		2,50E-06	1
Vibrio phage phiVa3 (MK568540)	9	1	0																																		8,50E-06	1
Vibrio phage vB_ValM_R10Z (MT612988)	9	1	0																																		8,50E-06	1
Vibrio phage vB_ValM_R11Z (MT612989)	9	1	0																																		8,50E-06	1
Vibrio phage VH7D (NC_023568)	9	1	0																																		8,50E-06	1
Vibrio phage vB_VmeM-32 (KU160494)	9	1	0																																		9,20E-07	1
Vibrio phage qdvp001 (NC_029057)	9	2	2			1,90E-06						8,70E-10																										1
Vibrio phage PWH3a-P1 (NC_020863)	9	1	1			1,60E-06																																1
Pseudoalteromonas phage SL20 (NC_047839)	9	0	0																																			2
Erwinia phage pEp_SNUABM_01 (NC_048807)	9	0	0																																			2								2,30E-53
Pseudomonas phage vB_PaeM_C2-10_Ab02 (NC_042113)	9	0	0																																			1								1,50E-68
Pseudomonas phage K8 (NC_028817)	9	0	0																																			1								5,50E-65
Pseudomonas phage K5 (NC_030910)	9	0	0																																			1								5,50E-65
Pseudomonas phage C11 (NC_028652)	9	0	0																																			1								2,20E-70
Pseudomonas phage vB_PaeM_MAG1 (NC_031073)	9	0	0																																			1								2,20E-70
Pseudomonas phage vB_PaeM_SCUT-S2 (MK340761)	9	0	0																																			1								3,10E-70
Pseudomonas phage vB_PaeM_C2-10_Ab08 (LN610575)	9	0	0																																			1								1,50E-68
Pseudomonas phage vB_PaeM_C2-10_Ab1 (NC_019918)	9	0	0																																			1								1,50E-68
Pseudomonas phage YS35 (MF974178)	9	0	0																																			1								1,50E-68
Pseudomonas phage PaGz-1 (MH791399)	9	0	0																																			1								1,50E-68
Pseudomonas phage PaZq-1 (MH791408)	9	0	0																																			1								1,50E-68
Pseudomonas phage PaoP5 (NC_029083)	9	0	0																																			1								1,60E-70
Pseudomonas phage vB_PaeM_LCK69 (MK138526)	9	0	0																																			1								2,20E-70
Pseudomonas phage PAK_P1 (NC_015294)	9	0	0																																			1								2,20E-70
Pseudomonas phage JG004 (NC_019450)	9	0	0																																			1								2,20E-70
Pseudomonas phage PAK_P2 (NC_022967)	9	0	0																																			1								2,20E-70
Pseudomonas phage PAK_P4 (NC_022986)	9	0	0																																			1								2,20E-70
Pseudomonas phage PA10 (NC_041903)	9	0	0																																			1								2,20E-70
Pseudomonas phage Zigelbrucke (NC_041904)	9	0	0																																			1								2,20E-70
Pseudomonas phage Henu5 (MK224498)	9	0	0																																			1								1,50E-68
Pseudomonas phage phiMK (NC_031110)	9	0	0																																			1								2,10E-68
Pseudomonas phage vB_PaM_EPA1 (MN013356)	9	0	0																																			1								4,50E-68
Pseudomonas phage PaP1 (NC_019913)	9	0	0																																			1								5,50E-65
Pseudomonas phage vB_PaeM_PAO1_Ab17 (LN610576)	9	0	0																																			1								9,40E-62
Pseudomonas phage PAK_P5 (NC_022966)	9	0	0																																			1								1,40E-61
Pseudomonas phage P3_CHA (KC862296)	9	0	0																																			1								1,60E-61
Pseudomonas phage PAK_P3 (NC_022970)	9	0	0																																			1								1,60E-61
Pseudomonas phage PAP-JP (MK799650)	9	0	0																																			1								1,10E-60
Pseudomonas phage CHA_P1 (NC_022974)	9	0	0																																			1								1,20E-60
Vibrio phage VMJ710 (MN402506)	9	0	0																																			1								1,90E-53
Escherichia coli O157 typing phage 5 (KP869103)	9	0	0																																			1								3,40E-52
Escherichia phage V5 (NC_011041)	9	0	0																																			1								3,40E-52
Escherichia phage vB_EcoM_HdK5 (MK373780)	9	0	0																																			1								4,60E-52
Escherichia phage inny (MN850601)	9	0	0																																			1								5,40E-49
Escherichia phage outra (MN850645)	9	0	0																																			1								5,40E-49
Escherichia phage muut (NC_052657)	9	0	0																																			1								5,40E-49
Escherichia phage 4MG (NC_022968)	9	0	0																																			1								7,30E-48
Klebsiella phage vB_KpnM_KB57 (NC_028659)	9	0	0																																			1								7,00E-47
Cronobacter phage vB_CsaM_GAP31 (NC_019400)	9	0	0																																			1								8,90E-46
Pseudoalteromonas phage J2-1 (MF988720)	9	0	0																																			1
Vibrio phage 1.193.O._10N.286.52.C6 (MG592562)	9	0	0																																			0
Vibrio phage 1.121.O._10N.286.46.C4 (MG592495)	8	1	0																		1,40E-17																	0
Aeromonas virus Aeh1 (NC_005260)	8	1	1											3,70E-11																								1
Aeromonas phage Ahp1_CNik-2021 (MT161459)	8	1	1											2,80E-08																								1
Pseudomonas phage ITTPL (MK443264)	8	0	0																																			1								2,00E-68
Pseudomonas phage SRT6 (MH370478)	8	0	0																																			1								1,60E-70
Pseudomonas phage PaYy-2 (MH725810)	8	0	0																																			1								3,10E-70
Pseudomonas phage vB_PaeM_PAO1_Ab03 (NC_026587)	8	0	0																																			1								9,40E-62
Pseudomonas phage Epa17 (MT108728)	8	0	0																																			1								2,40E-61
Pseudomonas phage Epa24 (MT108730)	8	0	0																																			1								2,40E-61
Pseudomonas phage Epa16 (MT118294)	8	0	0																																			1								2,40E-61
Pseudomonas phage Epa18 (MT118295)	8	0	0																																			1								2,40E-61
Pseudomonas phage Epa26 (MT118300)	8	0	0																																			1								2,40E-61
Pseudomonas phage vB_PaeM_PS24 (NC_028882)	8	0	0																																			1								2,40E-61
Pseudomonas phage KPP10 (NC_015272)	8	0	0																																			1								2,50E-60
Pseudomonas phage vB_PaeM_G1 (NC_041968)	8	0	0																																			1								1,10E-59
Pseudomonas phage ventosus (MG018930)	8	0	0																																			1								3,80E-56
Escherichia phage nieznany (NC_052659)	8	0	0																																			1								5,30E-48
Escherichia phage ESCO5 (NC_047776)	8	0	0																																			1								5,20E-48
Eschericha phage vB_EcoM-ECP26 (MK883717)	8	0	0																																			1								1,20E-36
Escherichia phage vB_EcoM_Gotham (MT682716)	8	0	0																																			1								3,70E-54
Escherichia phage FV3 (NC_019517)	8	0	0																																			1								5,70E-53
Phage 203 (MG022439)	8	0	0																																			1								1,20E-52
Phage 206 (MG022440)	8	0	0																																			1								1,20E-52
Escherichia phage nom (MN850646)	8	0	0																																			1								1,20E-52
Escherichia phage naam (MN850630)	8	0	0																																			1								1,30E-52
Escherichia phage navn (MN850642)	8	0	0																																			1								2,30E-52
Shigella phage CM1 (MK962749)	8	0	0																																			1								3,30E-52
Escherichia phage LL12 (MH491969)	8	0	0																																			1								3,70E-52
Escherichia phage vB_EcoM-ECP32 (MK883718)	8	0	0																																			1								4,30E-52
Escherichia phage inoa (MN850593)	8	0	0																																			1								4,50E-52
Escherichia coli O157 typing phage 14 (KP869112)	8	0	0																																			1								4,60E-52
Escherichia phage rV5_ev146 (LR699804)	8	0	0																																			1								4,60E-52
Escherichia phage EdH4 (MK327930)	8	0	0																																			1								4,60E-52
Escherichia phage ime (MN850576)	8	0	0																																			1								4,60E-52
Escherichia phage nomo (MN850578)	8	0	0																																			1								4,60E-52
Escherichia phage naswa (MN850595)	8	0	0																																			1								4,60E-52
Escherichia phage isim (MN850597)	8	0	0																																			1								4,60E-52
Escherichia phage nimi (MN850626)	8	0	0																																			1								4,60E-52
Escherichia phage pangalan (MN850627)	8	0	0																																			1								4,60E-52
Escherichia phage FFH2 (NC_024134)	8	0	0																																			1								4,60E-52
Escherichia phage Murica (NC_041871)	8	0	0																																			1								4,60E-52
Escherichia phage slur12 (LN881735)	8	0	0																																			1								6,10E-52
Escherichia phage rV5_ev147 (LR597647)	8	0	0																																			1								6,10E-52
Escherichia phage rV5_ev156 (LR694165)	8	0	0																																			1								6,10E-52
Escherichia phage magaca (MN850612)	8	0	0																																			1								6,10E-52
Escherichia phage nomine (MN850649)	8	0	0																																			1								6,10E-52
Escherichia phage vb_EcoM_bov10K2 (MT884008)	8	0	0																																			1								6,10E-52
Escherichia phage vb_EcoM_bov11CS3 (MT884009)	8	0	0																																			1								6,10E-52
Escherichia phage vb_EcoM_bov22_2 (MT884010)	8	0	0																																			1								6,10E-52
Escherichia phage vb_EcoM_bov25_3 (MT884011)	8	0	0																																			1								6,10E-52
Escherichia phage slur16 (NC_028248)	8	0	0																																			1								6,10E-52
Escherichia phage V18 (NC_041937)	8	0	0																																			1								6,10E-52
Escherichia phage APECc02 (NC_041869)	8	0	0																																			1								6,10E-52
Escherichia phage rV5_ev168 (LR694610)	8	0	0																																			1								6,30E-52
Escherichia phage rV5_ev158 (LR694611)	8	0	0																																			1								6,30E-52
Escherichia phage vB_EcoM-Pr121LW (MH752840)	8	0	0																																			1								9,90E-52
Escherichia coli O157 typing phage 4 (KP869102)	8	0	0																																			1								1,50E-51
Escherichia phage JES2013 (NC_022323)	8	0	0																																			1								1,50E-51
Escherichia phage nepoznato (NC_052658)	8	0	0																																			1								2,80E-48
Escherichia phage tuntematon (NC_052660)	8	0	0																																			1								5,30E-48
Escherichia phage vB_EcoM_UP17 (LR746137)	8	0	0																																			1								5,50E-48
Aeromonas phage 65.2 (KY290955)	8	0	0																																			1
Vibrio phage V09 (MT135026)	8	0	0																																			1
Vibrio phage KVP40 (NC_005083)	8	0	0																																			1
Vibrio phage phi-pp2 (JN849462)	8	0	0																																			1
Vibrio phage VH1_2019 (MN794232)	8	0	0																																			1
Vibrio phage ValKK3 (NC_028829)	8	0	0																																			1
Vibrio phage phi-Grn1 (KT919972)	8	0	0																																			1
Vibrio phage nt-1 (NC_021529)	8	0	0																																			1
Enterobacter phage vB_EkoM5VN (LC589952)	8	0	0																																			1
Cronobacter phage vB_CsaM_leE (NC_048646)	8	0	0																																			1
Klebsiella phage KMI9 (MN101223)	8	0	0																																			1
Klebsiella phage KP27 (NC_020080)	8	0	0																																			1
Klebsiella phage vB_KpnM_05F (LR746310)	8	0	0																																			1
Klebsiella phage vB_KpnM_M1 (MW448170)	8	0	0																																			1
Enterobacter phage phiEap-3 (NC_041980)	8	0	0																																			1
Cronobacter phage vB_CsaM_leN (KX431560)	8	0	0																																			1
Citrobacter phage Maroon (MH823906)	8	0	0																																			1
Klebsiella phage PMBT1 (NC_042138)	8	0	0																																			1
Klebsiella phage P-KP2 (MT157285)	8	0	0																																			1
Enterobacter phage EBPL (MT341500)	8	0	0																																			1
Cronobacter phage vB_CsaM_Cronuts (MW021751)	8	0	0																																			1
Cronobacter phage vB_CsaM_SemperBestia (MW021756)	8	0	0																																			1
Cronobacter phage vB_CsaM_GAP161 (NC_019398)	8	0	0																																			1
Klebsiella phage KP15 (NC_014036)	8	0	0																																			1
Citrobacter phage Margaery (NC_028755)	8	0	0																																			1
Vibrio phage eugene 12A10 (NC_029067)	8	0	0																																			0
Enterobacter phage phi63_307 (MG589384)	7	1	0																															7,00E-11				1
Erwinia phage SunLIRen (MH426725)	7	1	0																															7,00E-11				1
Salmonella phage vB_SenM_SB18 (MK759884)	7	1	0																															7,00E-11				1
Salmonella phage SE5 (MK770412)	7	1	0																															7,00E-11				1
Salmonella phage ST-3 (MN604407)	7	1	0																															7,00E-11				1
Erwinia phage phiEa21-4 (NC_011811)	7	1	0																															7,00E-11				1
Erwinia phage phiEa104 (NC_015292)	7	1	0																															7,00E-11				1
Erwinia phage vB_Eam-MM7 (NC_041978)	7	1	0																															1,50E-10				1
Alteromonas phage vB_AmeM_PT11-V22 (NC_048847)	7	1	0																		1,20E-24																	0
Pseudomonas phage PspYZU05 (KY971610)	7	1	1										6,50E-10																									2
Shewanella phage Thanatos-1 (MT457552)	7	1	1										5,60E-16																									1
Shewanella phage Thanatos-2 (MT457553)	7	1	1										2,80E-12																									1
Acinetobacter phage KARL-1 (NC_049441)	7	1	1			5,60E-12																																1
Acinetobacter phage Maestro (MT949699)	7	1	1			3,30E-13																																1
Acinetobacter phage Morttis (MW388004)	7	1	1			3,30E-13																																1
Acinetobacter phage Minot (MW388001)	7	1	1			7,00E-13																																1
Acinetobacter phage Mokit (MW388002)	7	1	1			7,00E-13																																1
Acinetobacter phage Melin (MW388003)	7	1	1			7,00E-13																																1
Acinetobacter phage AbTZA1 (NC_049445)	7	1	1			7,00E-13																																1
Acinetobacter phage vB_AbaM_PhT2 (NC_049494)	7	1	1			7,00E-13																																1
Acinetobacter phage vB_ApiM_fHyAci03 (NC_049438)	7	1	1			3,10E-12																																1
Acinetobacter phage Abraxas (MT385367)	7	1	1			3,40E-12																																1
Acinetobacter phage Berthold (NC_049490)	7	1	1			3,40E-12																																1
Acinetobacter phage Apostate (NC_049491)	7	1	1			3,40E-12																																1
Acinetobacter phage Kimel (NC_049492)	7	1	1			3,40E-12																																1
Acinetobacter phage AM101 (NC_049511)	7	1	1			3,40E-12																																1
Acinetobacter phage Stupor (MN662249)	7	1	1			5,60E-12																																1
Acinetobacter phage Octan (MT409116)	7	1	1			5,60E-12																																1
Acinetobacter phage Meroveus (MT741943)	7	1	1			5,60E-12																																1
Acinetobacter phage Lazarus (NC_049493)	7	1	1			5,60E-12																																1
Acinetobacter phage Henu6 (MK240351)	7	1	1			2,20E-11																																1
Acinetobacter phage ZZ1 (NC_018087)	7	1	1			2,20E-11																																1
Acinetobacter phage Konradin (NC_049479)	7	1	1			2,40E-11																																1
Vibrio phage vB_VchM_Kuja (NC_048827)	7	1	1			8,30E-11																																1
Acinetobacter phage Ac42 (NC_014660)	7	1	1			2,20E-09																																1
Aeromonas phage AsFcp_2 (MH791401)	7	1	1											1,20E-11																								1
Aeromonas phage AsFcp_4 (MH791407)	7	1	1											1,20E-11																								1
Aeromonas phage phiAS5 (NC_014636)	7	1	1											2,60E-11																								1
Aeromonas phage PX29 (NC_023688)	7	1	1											9,70E-11																								1
Vibrio phage 1.170.O._10N.261.52.C3 (MG592537)	7	1	1			2,00E-07																																0
Providencia phage PSTRCR_127 (MW358927)	7	0	0																																			2
Providencia phage PSTRCR_121 (MW385300)	7	0	0																																			2
Morganella phage vB_MmoM_MP1 (NC_031020)	7	0	0																																			2
Pseudomonas phage vB_PsyM_KIL3 (KU130128)	7	0	0																																			1								4,90E-54
Pseudomonas phage vB_PsyM_KIL3b (KU130131)	7	0	0																																			1								4,90E-54
Pseudomonas phage vB_PsyM_KIL2 (KU130127)	7	0	0																																			1								3,60E-53
Pseudomonas phage vB_PsyM_KIL1 (NC_030934)	7	0	0																																			1								4,90E-54
Pseudomonas phage vB_PsyM_KIL5 (KU130130)	7	0	0																																			1								7,10E-55
Pseudomonas phage vB_PsyM_KIL4 (NC_042054)	7	0	0																																			1								7,10E-55
Rheinheimera phage vB_RspM_Barba5S (NC_048187)	7	0	0																																			1								9,80E-22
Rheinheimera phage vB_RspM_Barba8S (NC_048188)	7	0	0																																			1								9,80E-22
Pseudomonas phage PPSC2 (MF893340)	7	0	0																																			1								2,10E-54
Pseudoalteromonas phage H101 (NC_029094)	7	0	0																																			1
Pseudomonas phage PaSzW-1 (MH791416)	7	0	0																																			1								1,50E-68
Escherichia phage JEP1 (MT740314)	7	0	0																																			1								1,10E-52
Escherichia phage ESCO13 (NC_047770)	7	0	0																																			1								1,70E-48
Escherichia phage vB_EcoM-Ro121c4YLVW (NC_052654)	7	0	0																																			1								2,80E-48
Escherichia phage phAPEC8_ev052 (LR597654)	7	0	0																																			1								5,20E-48
Escherichia phage anhysbys (NC_052656)	7	0	0																																			1								5,20E-48
Klebsiella phage ZCKP1 (NC_047994)	7	0	0																																			1								5,50E-48
Escherichia phage PNJ1809-36 (MT944117)	7	0	0																																			1								5,50E-48
Escherichia phage phAPEC8 (NC_020079)	7	0	0																																			1								5,50E-48
Escherichia phage ukendt (NC_052661)	7	0	0																																			1								5,50E-48
Escherichia phage Mt1B1_P17 (NC_052662)	7	0	0																																			1								5,90E-48
Escherichia phage vB_EcoM-Ro121lw (MH160766)	7	0	0																																			1								1,30E-47
Escherichia phage vB_EcoM_Schickermooser (NC_048196)	7	0	0																																			1								1,30E-47
Vibrio phage 1.081.O._10N.286.52.C2 (MG592456)	7	0	0																																			1
Escherichia phage vB_EcoM_PHB13 (MK573636)	7	0	0																																			1
Escherichia virus Ec_Makalu_003 (MN882349)	7	0	0																																			1
Escherichia phage vB_EcoM_G2248 (MK327932)	7	0	0																																			1
Pectobacterium bacteriophage PM2 (NC_028940)	7	0	0																																			1
Escherichia phage kvi (MN850615)	7	0	0																																			1
Escherichia phage JSE (NC_012740)	7	0	0																																			1
Escherichia phage vB_EcoM_G2494 (MK327935)	7	0	0																																			1
Escherichia phage E26 (MN655998)	7	0	0																																			1
Escherichia virus Ec_Makalu_002 (MN709127)	7	0	0																																			1
Escherichia virus Ec_Makalu_001 (MN894885)	7	0	0																																			1
Escherichia phage vB_EcoM_011D4 (MT478991)	7	0	0																																			1
Escherichia phage vB_EcoM_G37-3 (MK327941)	7	0	0																																			1
Escherichia phage vB_EcoM_G5211 (MK327947)	7	0	0																																			1
Escherichia phage RB49 (NC_005066)	7	0	0																																			1
Shigella phage Sf20 (MF327006)	7	0	0																																			1
Escherichia virus KFS-EC (MH560358)	7	0	0																																			1
Escherichia phage JEP8 (MT764208)	7	0	0																																			1
Escherichia phage Phi1 (NC_009821)	7	0	0																																			1
Enterobacteria phage GEC-3S (NC_025425)	7	0	0																																			1
Escherichia phage ECD7 (NC_041936)	7	0	0																																			1
Shigella phage JK32 (MK962753)	7	0	0																																			1
Escherichia phage kaaroe (MN850574)	7	0	0																																			1
Escherichia phage phT4A (KX130727)	7	0	0																																			1
Cronobacter phage vB_CsaM_leB (NC_048645)	7	0	0																																			1
Klebsiella phage Matisse (NC_028750)	7	0	0																																			1
Klebsiella phage Miro (NC_041981)	7	0	0																																			1
Escherichia phage vB_EcoM_VR7 (NC_014792)	7	0	0																																			1
Aeromonas phage AP1 (MT713136)	7	0	0																																			1
Aeromonas phage AS-zj (NC_048673)	7	0	0																																			1
Aeromonas phage AS-sw (NC_048674)	7	0	0																																			1
Aeromonas phage CC2 (NC_019538)	7	0	0																																			1
Aeromonas phage Assk (MH791404)	7	0	0																																			1
Aeromonas phage Asswx_1 (MH791398)	7	0	0																																			1
Aeromonas phage AS-szw (MF498773)	7	0	0																																			1
Aeromonas phage Ah1 (MG250483)	7	0	0																																			1
Bacteriophage DSS3_VP1 (MN602266)	7	0	0																																			0
Bacteriophage DSS3_PM1 (MN602267)	7	0	0																																			0
Vibrio phage helene 12B3 (NC_021067)	7	0	0																																			0
Nitrincola phage 1M3-16 (NC_024217)	7	0	0																																			0
Buttiauxella phage vB_ButM_GuL6 (MT334653)	7	0	0																																			0
Yersinia phage JC221 (MN508817)	7	0	0																																			0
Vibrio phage 1.063.O._10N.261.45.C7 (MG592441)	7	0	0																																			0
Stenotrophomonas phage vB_SmaS-DLP_6 (KU682439)	6	1	1			1,20E-11																																2								4,50E-52
Roseovarius sp. 217 phage 1 (FR682616)	6	1	1											1,90E-11																								1								3,20E-31
Roseovarius Plymouth podovirus 1 (NC_049345)	6	1	1											2,20E-11																								1								4,10E-32
Acinetobacter phage Acj9 (NC_014663)	6	1	1			3,90E-13																																0
Acinetobacter phage Acj61 (NC_014661)	6	1	1			6,40E-11																																0
Pseudomonas phage phiPMW (NC_041880)	6	0	0																																			1								3,30E-34
Pseudomonas phage VCM (NC_029065)	6	0	0																																			1								4,00E-59
Pseudomonas phage phiPsa300 (MT670418)	6	0	0																																			1								9,00E-59
Pseudomonas phage phiPsa397 (MT670422)	6	0	0																																			1								9,00E-59
Pseudomonas phage phiPsa374 (NC_023601)	6	0	0																																			1								9,00E-59
Pseudomonas phage phiPsa381 (MT670421)	6	0	0																																			1								1,00E-58
Pseudomonas phage phiPsa267 (MT670417)	6	0	0																																			1								2,80E-58
Pseudomonas phage phiPsa347 (MT670420)	6	0	0																																			1								1,80E-57
Pseudomonas phage phiPsa315 (MT670419)	6	0	0																																			1								3,70E-56
Pseudomonas phage PN09 (MW175491)	6	0	0																																			1								2,20E-53
Edwardsiella phage vB_EtaM_ET-ABTNL-9 (MN399336)	6	0	0																																			1								1,10E-55
Proteus phage Privateer (NC_048861)	6	0	0																																			1							5,20E-06
Cronobacter phage vB_CsaP_009 (NC_048664)	6	0	0																																			1							6,40E-06
Acinetobacter phage AM24 (KY000079)	6	0	0																																			1								4,50E-55
Caulobacter phage CcrColossus (NC_019406)	6	0	0																																			1								3,30E-35
Caulobacter phage CcrPW (NC_048046)	6	0	0																																			1								4,10E-35
Proteus phage PM2 (MF001355)	6	0	0																																			1
Proteus phage phiP4-3 (MG696114)	6	0	0																																			1
Proteus phage SJ_PmiM (MW367898)	6	0	0																																			1
Proteus phage vB_PmiM_Pm5461 (NC_028762)	6	0	0																																			1
Shigella phage vB_SdyM_006 (MK295204)	6	0	0																																			1
Escherichia phage Av-05 (NC_025830)	6	0	0																																			1
Shigella phage Silverhawkium (MK562505)	6	0	0																																			1
Shigella phage Sf15 (MF158041)	6	0	0																																			1
Shigella phage Sf16 (MF158043)	6	0	0																																			1
Shigella phage Sf18 (MF158044)	6	0	0																																			1
Shigella phage Sf19 (MF327005)	6	0	0																																			1
Shigella phage KPS64 (MK562502)	6	0	0																																			1
Shigella phage Sf13 (NC_042017)	6	0	0																																			1
Shigella phage Sf14 (NC_042075)	6	0	0																																			1
Shigella phage Sf17 (NC_042076)	6	0	0																																			1
Escherichia phage vB_EcoM_3HA14 (MN342151)	6	0	0																																			1
Enterobacteria phage CHB7 (MK562504)	6	0	0																																			1
Escherichia phage EcSzw-2 (MH791400)	6	0	0																																			1
Escherichia phage EcSzw_1 (MH791413)	6	0	0																																			1
Citrobacter phage Maleficent (MH920362)	6	0	0																																			1
Citrobacter phage Michonne (NC_028247)	6	0	0																																			1
Citrobacter phage Mordin (NC_041977)	6	0	0																																			1
Escherichia phage VpaE1_ev035 (LR699048)	6	0	0																																			1
Escherichia phage vB_EcoM-VpaE1 (NC_027337)	6	0	0																																			1
Escherichia phage mistaenkt (MN850587)	6	0	0																																			1
Salmonella phage BPS15Q2 (NC_031939)	6	0	0																																			1
Salmonella phage vB Seyj1-1 (MW423797)	6	0	0																																			1
Escherichia phage SUSP2 (NC_028935)	6	0	0																																			1
Citrobacter phage Mijalis (KY654690)	6	0	0																																			1
Citrobacter phage Moogle (NC_027293)	6	0	0																																			1
Enterobacteria phage XTG1 (KT184316)	6	0	0																																			1
Salmonella phage vB_SPuM_SP116 (NC_027329)	6	0	0																																			1
Enterobacteria phage vB_EcoM_IME338 (MH051914)	6	0	0																																			1
Salmonella phage SP3 (MW296865)	6	0	0																																			1
Escherichia phage JH2 (NC_029023)	6	0	0																																			1
Salmonella phage Mushroom (NC_041923)	6	0	0																																			1
Escherichia phage SUSP1 (NC_028808)	6	0	0																																			1
Salmonella phage FO1a (JF461087)	6	0	0																																			1
Escherichia phage VpaE1_ev108 (LR597658)	6	0	0																																			1
Salmonella phage ST11 (MF370225)	6	0	0																																			1
Salmonella virus VSe11 (MG251391)	6	0	0																																			1
Salmonella virus VSe102 (MG251392)	6	0	0																																			1
Escherichia phage vB_EcoM_LMP25 (MK482688)	6	0	0																																			1
Escherichia phage vB_EcoM_LMP33 (MK482689)	6	0	0																																			1
Escherichia phage vB_EcoM_LMP34 (MK482690)	6	0	0																																			1
Salmonella phage DaR-2019a (MK965969)	6	0	0																																			1
Salmonella phage DaR-2019b (MK965970)	6	0	0																																			1
Salmonella phage GEC_vB_B1 (MW006474)	6	0	0																																			1
Salmonella phage GEC_vB_BS (MW006475)	6	0	0																																			1
Salmonella phage GEC_vB_NS7 (MW006482)	6	0	0																																			1
Salmonella phage FelixO1 (NC_005282)	6	0	0																																			1
Salmonella phage Si3 (NC_041922)	6	0	0																																			1
Escherichia coli O157 typing phage 11 (KP869109)	6	0	0																																			1
Escherichia coli O157 typing phage 12 (KP869110)	6	0	0																																			1
Escherichia phage fjerdesal (MN850605)	6	0	0																																			1
Escherichia phage HY02 (NC_028872)	6	0	0																																			1
Escherichia typing phage 1 (NC_041979)	6	0	0																																			1
Enterobacteria phage KhF1 (KT184313)	6	0	0																																			1
Enterobacteria phage KhF2 (KT184314)	6	0	0																																			1
Escherichia phage L27 (LC473039)	6	0	0																																			1
Escherichia phage SP22 (LC519489)	6	0	0																																			1
Escherichia phage VpaE1_ev78 (LR597663)	6	0	0																																			1
Escherichia phage vB_EcoM-Ro111lw (MH571750)	6	0	0																																			1
Shigella phage JK55 (MK962758)	6	0	0																																			1
Escherichia phage heid (MN850577)	6	0	0																																			1
Escherichia phage momo (MN850580)	6	0	0																																			1
Escherichia phage nataliec (MN850611)	6	0	0																																			1
Escherichia phage adrianh (MN850614)	6	0	0																																			1
Escherichia phage finno (MN850619)	6	0	0																																			1
Escherichia phage mio (MN850631)	6	0	0																																			1
Escherichia phage dune (MN850636)	6	0	0																																			1
Escherichia coli phage vB_EcoM_Shy (MT833282)	6	0	0																																			1
Escherichia phage bumzen (MN850635)	6	0	0																																			1
Enterobacteriaphage UAB_Phi87 (NC_027360)	6	0	0																																			1
Escherichia phage allfine (MN850633)	6	0	0																																			1
Escherichia phage vB_EcoM_AYO145A (NC_028825)	6	0	0																																			1
Escherichia phage humlepung (MN850564)	6	0	0																																			1
Escherichia phage garuso (MN850566)	6	0	0																																			1
Escherichia phage Andreotti (MN850610)	6	0	0																																			1
Escherichia phage warpig (MN850637)	6	0	0																																			1
Shigella phage Z31 (MN655999)	6	0	0																																			1
Phage NBEco004 (MN994498)	6	0	0																																			1
Escherichia phage wV8 (NC_012749)	6	0	0																																			1
Enterobacteria phage KhF3 (KT184315)	6	0	0																																			1
Escherichia phage PHB11 (MK524176)	6	0	0																																			1
Phage NBEco005 (MN994499)	6	0	0																																			1
Escherichia phage EC6 (NC_027369)	6	0	0																																			1
Escherichia phage vB_EcoM_Alf5 (NC_031082)	6	0	0																																			1
Salmonella phage BPS17L1 (NC_042096)	6	0	0																																			1
Escherichia phage pinkbiff (MN850603)	6	0	0																																			1
Salmonella phage D1-2 (MN481367)	6	0	0																																			1
Salmonella phage Meda (MH586731)	6	0	0																																			1
Staphylococcus phage SA1 (NC_027991)	6	0	0																																			1
Salmonella phage BPS15S6 (MG646670)	6	0	0																																			1
Salmonella phage BPS17S6 (MG646671)	6	0	0																																			1
Salmonella phage BPSELC-1 (MN227145)	6	0	0																																			1
Salmonella phage BPS17W1 (NC_042097)	6	0	0																																			1
Escherichia phage ekra (MN850644)	6	0	0																																			1
Phage NBSal004 (MN994503)	6	0	0																																			1
Escherichia phage skuden (MN850585)	6	0	0																																			1
Cronobacter phage S13 (NC_028773)	6	0	0																																			1
Escherichia phage DK-13 (MT611523)	6	0	0																																			1
Escherichia phage CJ20 (MT533174)	6	0	0																																			1
Escherichia phage vB_EcoM_VR26 (NC_028957)	6	0	0																																			1
Escherichia phage vB_EcoM_VR20 (NC_028894)	6	0	0																																			1
Shigella phage SP18 (NC_014595)	6	0	0																																			1
Vibrio phage 1.161.O._10N.261.48.C5 (MG592529)	6	0	0																																			1
Pectinobacterium phage vB_PcaM_CBB (NC_041878)	6	0	0																																			1
Cronobacter phage vB_CsaM_GAP32 (NC_019401)	6	0	0																																			1
Klebsiella phage EI (MN106245)	6	0	0																																			1
Pseudomonas phage pf16 (NC_041881)	6	0	0																																			1								1,60E-43
Aeromonas virus 65 (NC_015251)	6	0	0																																			1
Klebsiella phage Metamorpho (MT701588)	6	0	0																																			1
Vibrio phage 1.244.A._10N.261.54.C3 (MG592609)	6	0	0																																			1
Vibrio phage 1.255.O._10N.286.45.F1 (MG592621)	6	0	0																																			1
Klebsiella phage vB_Kpn_P545 (MN781108)	6	0	0																																			1
Klebsiella phage KP179 (MH729874)	6	0	0																																			1
Erwinia phage Cronus (MH059636)	6	0	0																																			1
Enterobacter phage PG7 (NC_023561)	6	0	0																																			1
Klebsiella phage vB_KaeM_KaAlpha (MN013084)	6	0	0																																			1
Serratia phage X20 (MF036692)	6	0	0																																			1
Enterobacter phage prasa_myo (MN617835)	6	0	0																																			1
Roseobacter phage CRP-6 (MK613348)	6	0	0																																			0
Vibrio phage 1.187.O._10N.286.49.F1 (MG592553)	6	0	0																																			0
Rheinheimera phage vB_RspM_Barba19A (NC_048190)	6	0	0																																			0
Rheinheimera phage vB_RspM_Barba31A (MK719750)	6	0	0																																			0
Rheinheimera phage vB_RspM_Barba1A (MK719701)	6	0	0																																			0
Rheinheimera phage vB_RspM_Barba1S (MK719702)	6	0	0																																			0
Rheinheimera phage vB_RspM_Barba2A (MK719703)	6	0	0																																			0
Rheinheimera phage vB_RspM_Barba2S (MK719704)	6	0	0																																			0
Rheinheimera phage vB_RspM_Barba3A (MK719705)	6	0	0																																			0
Rheinheimera phage vB_RspM_Barba3S (MK719706)	6	0	0																																			0
Rheinheimera phage vB_RspM_Barba4A (MK719707)	6	0	0																																			0
Rheinheimera phage vB_RspM_Barba4S (MK719708)	6	0	0																																			0
Rheinheimera phage vB_RspM_Barba5A (MK719709)	6	0	0																																			0
Rheinheimera phage vB_RspM_Barba6A (MK719711)	6	0	0																																			0
Rheinheimera phage vB_RspM_Barba7A (MK719712)	6	0	0																																			0
Rheinheimera phage vB_RspM_Barba8A (MK719713)	6	0	0																																			0
Rheinheimera phage vB_RspM_Barba9A (MK719715)	6	0	0																																			0
Rheinheimera phage vB_RspM_Barba10A (MK719716)	6	0	0																																			0
Rheinheimera phage vB_RspM_Barba10S (MK719717)	6	0	0																																			0
Rheinheimera phage vB_RspM_Barba11S (MK719718)	6	0	0																																			0
Rheinheimera phage vB_RspM_Barba12A (MK719719)	6	0	0																																			0
Rheinheimera phage vB_RspM_Barba12S (MK719720)	6	0	0																																			0
Rheinheimera phage vB_RspM_Barba13A (MK719721)	6	0	0																																			0
Rheinheimera phage vB_RspM_Barba14S (MK719723)	6	0	0																																			0
Rheinheimera phage vB_RspM_Barba15A (MK719724)	6	0	0																																			0
Rheinheimera phage vB_RspM_Barba15S (MK719725)	6	0	0																																			0
Rheinheimera phage vB_RspM_Barba16S (MK719726)	6	0	0																																			0
Rheinheimera phage vB_RspM_Barba17A (MK719727)	6	0	0																																			0
Rheinheimera phage vB_RspM_Barba17S (MK719728)	6	0	0																																			0
Rheinheimera phage vB_RspM_Barba20A (MK719731)	6	0	0																																			0
Rheinheimera phage vB_RspM_Barba20S (MK719732)	6	0	0																																			0
Rheinheimera phage vB_RspM_Barba21S (MK719734)	6	0	0																																			0
Rheinheimera phage vB_RspM_Barba22A (MK719735)	6	0	0																																			0
Rheinheimera phage vB_RspM_Barba22S (MK719736)	6	0	0																																			0
Rheinheimera phage vB_RspM_Barba23A (MK719737)	6	0	0																																			0
Rheinheimera phage vB_RspM_Barba23S (MK719738)	6	0	0																																			0
Rheinheimera phage vB_RspM_Barba24S (MK719739)	6	0	0																																			0
Rheinheimera phage vB_RspM_Barba25A (MK719740)	6	0	0																																			0
Rheinheimera phage vB_RspM_Barba25S (MK719741)	6	0	0																																			0
Rheinheimera phage vB_RspM_Barba26A (MK719742)	6	0	0																																			0
Rheinheimera phage vB_RspM_Barba26S (MK719743)	6	0	0																																			0
Rheinheimera phage vB_RspM_Barba27S (MK719744)	6	0	0																																			0
Rheinheimera phage vB_RspM_Barba28A (MK719745)	6	0	0																																			0
Rheinheimera phage vB_RspM_Barba28S (MK719746)	6	0	0																																			0
Rheinheimera phage vB_RspM_Barba29A (MK719747)	6	0	0																																			0
Rheinheimera phage vB_RspM_Barba32A (MK719751)	6	0	0																																			0
Rheinheimera phage vB_RspM_Barba33A (MK719752)	6	0	0																																			0
Rheinheimera phage vB_RspM_Barba34A (MK719753)	6	0	0																																			0
Rheinheimera phage vB_RspM_Barba35A (MK719754)	6	0	0																																			0
Rheinheimera phage vB_RspM_barba_1-3A (MT497224)	6	0	0																																			0
Rheinheimera phage vB_RspM_barba_10-8A (MT497225)	6	0	0																																			0
Rheinheimera phage vB_RspM_barba_10-8B (MT497226)	6	0	0																																			0
Rheinheimera phage vB_RspM_barba_10-8D (MT497227)	6	0	0																																			0
Rheinheimera phage vB_RspM_barba_10-9A (MT497228)	6	0	0																																			0
Rheinheimera phage vB_RspM_barba_10-9B (MT497229)	6	0	0																																			0
Rheinheimera phage vB_RspM_barba_10-9C (MT497230)	6	0	0																																			0
Rheinheimera phage vB_RspM_barba_10-9D (MT497231)	6	0	0																																			0
Rheinheimera phage vB_RspM_barba_10-9E (MT497232)	6	0	0																																			0
Rheinheimera phage vB_RspM_barba_10-9F (MT497233)	6	0	0																																			0
Rheinheimera phage vB_RspM_barba_10-9G (MT497234)	6	0	0																																			0
Rheinheimera phage vB_RspM_barba_10-9H (MT497235)	6	0	0																																			0
Rheinheimera phage vB_RspM_barba_10-9I (MT497236)	6	0	0																																			0
Rheinheimera phage vB_RspM_barba_10-9J (MT497237)	6	0	0																																			0
Rheinheimera phage vB_RspM_barba_11-8A (MT497238)	6	0	0																																			0
Rheinheimera phage vB_RspM_barba_12-6A (MT497239)	6	0	0																																			0
Rheinheimera phage vB_RspM_barba_12-6B (MT497240)	6	0	0																																			0
Rheinheimera phage vB_RspM_barba_12-6C (MT497241)	6	0	0																																			0
Rheinheimera phage vB_RspM_barba_12-6D (MT497242)	6	0	0																																			0
Rheinheimera phage vB_RspM_barba_12-6E (MT497243)	6	0	0																																			0
Rheinheimera phage vB_RspM_barba_12-6F (MT497244)	6	0	0																																			0
Rheinheimera phage vB_RspM_barba_12-6G (MT497245)	6	0	0																																			0
Rheinheimera phage vB_RspM_barba_12-6H (MT497246)	6	0	0																																			0
Rheinheimera phage vB_RspM_barba_12-6I (MT497247)	6	0	0																																			0
Rheinheimera phage vB_RspM_barba_12-6J (MT497248)	6	0	0																																			0
Rheinheimera phage vB_RspM_barba_12-7A (MT497249)	6	0	0																																			0
Rheinheimera phage vB_RspM_barba_12-7B (MT497250)	6	0	0																																			0
Rheinheimera phage vB_RspM_barba_12-7C (MT497251)	6	0	0																																			0
Rheinheimera phage vB_RspM_barba_12-7D (MT497252)	6	0	0																																			0
Rheinheimera phage vB_RspM_barba_12-7E (MT497253)	6	0	0																																			0
Rheinheimera phage vB_RspM_barba_12-7F (MT497254)	6	0	0																																			0
Rheinheimera phage vB_RspM_barba_12-7G (MT497255)	6	0	0																																			0
Rheinheimera phage vB_RspM_barba_12-7H (MT497256)	6	0	0																																			0
Rheinheimera phage vB_RspM_barba_12-7I (MT497257)	6	0	0																																			0
Rheinheimera phage vB_RspM_barba_12-7J (MT497258)	6	0	0																																			0
Rheinheimera phage vB_RspM_barba_12-8A (MT497259)	6	0	0																																			0
Rheinheimera phage vB_RspM_barba_12-8B (MT497260)	6	0	0																																			0
Rheinheimera phage vB_RspM_barba_12-8C (MT497261)	6	0	0																																			0
Rheinheimera phage vB_RspM_barba_12-8E (MT497262)	6	0	0																																			0
Rheinheimera phage vB_RspM_barba_12-8F (MT497263)	6	0	0																																			0
Rheinheimera phage vB_RspM_barba_12-8G (MT497264)	6	0	0																																			0
Rheinheimera phage vB_RspM_barba_12-8H (MT497265)	6	0	0																																			0
Rheinheimera phage vB_RspM_barba_12-8I (MT497266)	6	0	0																																			0
Rheinheimera phage vB_RspM_barba_12-9A (MT497267)	6	0	0																																			0
Rheinheimera phage vB_RspM_barba_12-9B (MT497268)	6	0	0																																			0
Rheinheimera phage vB_RspM_barba_12-9C (MT497269)	6	0	0																																			0
Rheinheimera phage vB_RspM_barba_12-9D (MT497270)	6	0	0																																			0
Rheinheimera phage vB_RspM_barba_12-9E (MT497271)	6	0	0																																			0
Rheinheimera phage vB_RspM_barba_12-9F (MT497272)	6	0	0																																			0
Rheinheimera phage vB_RspM_barba_12-9G (MT497273)	6	0	0																																			0
Rheinheimera phage vB_RspM_barba_12-9I (MT497274)	6	0	0																																			0
Rheinheimera phage vB_RspM_barba_12-9J (MT497275)	6	0	0																																			0
Rheinheimera phage vB_RspM_barba_13-4A (MT497276)	6	0	0																																			0
Rheinheimera phage vB_RspM_barba_13-6A (MT497277)	6	0	0																																			0
Rheinheimera phage vB_RspM_barba_13-8A (MT497278)	6	0	0																																			0
Rheinheimera phage vB_RspM_barba_5-7A (MT497279)	6	0	0																																			0
Rheinheimera phage vB_RspM_Barba18A (NC_048189)	6	0	0																																			0
Rheinheimera phage vB_RspM_Barba14A (MK719722)	6	0	0																																			0
Rheinheimera phage vB_RspM_Barba29S (MK719748)	6	0	0																																			0
Rheinheimera phage vB_RspM_Barba30A (MK719749)	6	0	0																																			0
Rheinheimera phage vB_RspM_Barba21A (NC_048191)	6	0	0																																			0
Vibrio phage 1.084.O._10N.261.49.F5 (MG592459)	6	0	0																																			0
Escherichia virus RB43 (NC_007023)	6	0	0																																			0
Citrobacter phage vB_Cfr_Xman (MW021749)	6	0	0																																			0
Citrobacter phage vB_CfrM_CfP1 (NC_031057)	6	0	0																																			0
Escherichia virus RB43 (HE858210)	6	0	0																																			0
Escherichia virus RB43 (HE981739)	6	0	0																																			0
Escherichia phage Lw1 (NC_021344)	6	0	0																																			0
Salmonella phage Munch (MK268344)	6	0	0																																			0
Salmonella phage 7t3 (MK773491)	6	0	0																																			0
Salmonella phage SE_PL (MT001829)	6	0	0																																			0
Panteoa phage Phynn (MN038175)	6	0	0																																			0
Aeromonas phage LAh_6 (NC_048774)	5	1	0																															9,90E-09				0
Aeromonas phage LAh9 (NC_048776)	5	1	0																															9,90E-09				0
Aeromonas phage 4_4572 (NC_048773)	5	1	0																															1,30E-08				0
Aeromonas phage LAh_8 (NC_048775)	5	1	0																															1,30E-08				0
Vibrio phage vB_VpP_BA6 (MK483107)	5	1	0																																		5,00E-07	0
Vibrio phage KIT05 (AP019417)	5	1	0																																		4,90E-06	0
Acinetobacter virus 133 (NC_015250)	5	1	1			1,10E-13																																1
Vibrio phage CHOED (NC_023863)	5	1	1			3,30E-16																																0
Vibrio phage YC (NC_048709)	5	1	1			3,90E-09																																0
Vibrio phage vB_VcorM_GR28A (MT366762)	5	1	1			6,20E-09																																0
Prochlorococcus phage P-HM1 (NC_015280)	5	1	1			7,00E-10																																0
Pseudomonas phage vB_PaeM_MIJ3 (LR588166)	5	1	1			1,10E-09																																0
Pseudomonas phage vB_PaeM_PA5oct (MK797984)	5	1	1			2,30E-09																																0
Vibrio phage vB_ValS_X1 (MT442039)	5	1	1			4,20E-07																																0
Vibrio phage vB_VpS_PG07 (NC_048041)	5	1	1			4,90E-07																																0
Vibrio phage V05 (MT135024)	5	0	0																																			1
Acinetobacter phage vB_AbaM_B9 (MH133207)	5	0	0																																			1								1,60E-50
Acinetobacter phage YMC13/03/R2096 (NC_027332)	5	0	0																																			1								1,80E-58
Erwinia phage vB_EamP_Gutmeister (KX098391)	5	0	0																																			1								4,80E-46
Erwinia phage vB_EamP_Rexella (KX098390)	5	0	0																																			1								4,90E-46
Erwinia phage vB_EamP-S2 (NC_047917)	5	0	0																																			1										2,80E-12
Erwinia phage phiEa1H (FQ482084)	5	0	0																																			1										2,40E-11
Erwinia phage phiEa100 (NC_019926)	5	0	0																																			1										2,40E-11
Erwinia amylovora phage Era103 (NC_009014)	5	0	0																																			1										2,50E-11
Pseudomonas phage MR4 (MT104467)	5	0	0																																			1										2,20E-10
Escherichia phage ECBP5 (NC_027330)	5	0	0																																			1										6,00E-09
Bacteriophage Reminis (MN478376)	5	0	0																																			1										4,70E-08
Pectobacterium phage PP99 (NC_047802)	5	0	0																																			1										7,20E-08
Escherichia phage radambza (MN850639)	5	0	0																																			1
Escherichia coli O157 typing phage 8 (KP869106)	5	0	0																																			1
Escherichia coli O157 typing phage 15 (KP869113)	5	0	0																																			1
Escherichia phage tootiki (MN850647)	5	0	0																																			1
Klebsiella phage KMI7 (MN101221)	5	0	0																																			1
Pseudomonas phage JHP (MK443265)	5	0	0																																			1								1,60E-70
Stenotrophomonas phage IME-SM1 (KR560069)	5	0	0																																			1								7,50E-26
Yersinia phage fHe-Yen9-04 (LR596615)	5	0	0																																			1
Yersinia phage fHe-Yen9-04 (NC_042116)	5	0	0																																			1
Dickeya phage Ds3CZ (MN788369)	5	0	0																																			1
Dickeya phage Ds9CZ (MN813049)	5	0	0																																			1
Dickeya phage Coodle (MH807820)	5	0	0																																			1
Dickeya phage Ds5CZ (MN813048)	5	0	0																																			1
Dickeya phage Ds20CZ (MN813051)	5	0	0																																			1
Escherichia phage vB_vPM_PD112 (MH837626)	5	0	0																																			1
Escherichia phage vB_EcoM_IME537 (MT179807)	5	0	0																																			1
Stenotrophomonas phage Mendera (NC_048804)	5	0	0																																			1								4,40E-50
Stenotrophomonas phage Moby (NC_048802)	5	0	0																																			1								5,70E-50
Stenotrophomonas phage YB07 (NC_048755)	5	0	0																																			1								3,20E-49
Sphingobium phage Lacusarx (NC_041927)	5	0	0																																			1								1,80E-39
Silicibacter phage DSS3phi2 (NC_012697)	5	0	0																																			1								7,00E-34
Ruegeria phage vB_RpoP-V21 (MH015253)	5	0	0																																			1								7,30E-34
Ruegeria phage vB_RpoP-V14 (MH015257)	5	0	0																																			1								7,30E-34
Ruegeria phage vB_RpoP-V17 (MH015259)	5	0	0																																			1								7,30E-34
Ruegeria phage vB_RpoP-V12 (NC_049435)	5	0	0																																			1								7,30E-34
Sulfitobacter phage EE36phi1 (NC_012696)	5	0	0																																			1								1,20E-33
Caulobacter phage CcrBL10 (NC_048045)	5	0	0																																			1								2,80E-31
Caulobacter phage CcrSC (NC_048048)	5	0	0																																			1								4,10E-31
Caulobacter phage CcrBL9 (NC_048047)	5	0	0																																			1								1,90E-30
Caulobacter virus Rogue (NC_019408)	5	0	0																																			1								3,60E-30
Caulobacter virus phiCbK (JX163858)	5	0	0																																			1								5,40E-30
Caulobacter phage Ccr32 (KY555146)	5	0	0																																			1								5,40E-30
Caulobacter phage Ccr34 (KY555147)	5	0	0																																			1								5,40E-30
Caulobacter virus phiCbK (NC_019405)	5	0	0																																			1								5,40E-30
Caulobacter phage Ccr10 (KY555142)	5	0	0																																			1								1,40E-29
Caulobacter phage Ccr2 (KY555143)	5	0	0																																			1								1,40E-29
Caulobacter phage Ccr29 (KY555145)	5	0	0																																			1								1,40E-29
Caulobacter phage Ccr5 (KY555144)	5	0	0																																			1								1,50E-29
Caulobacter virus Karma (NC_019410)	5	0	0																																			1								1,50E-29
Caulobacter virus Magneto (NC_019407)	5	0	0																																			1								2,10E-29
Caulobacter virus Swift (NC_019411)	5	0	0																																			1								2,10E-29
Ralstonia phage RSP15 (NC_030948)	5	0	0																																			1
Erwinia phage pEa_SNUABM_50 (MT939488)	5	0	0																																			1
Erwinia phage pEa_SNUABM_47 (MT939487)	5	0	0																																			1
Serratia phage BF (NC_041917)	5	0	0																																			1
Erwinia phage pEa_SNUABM_12 (MT939486)	5	0	0																																			1
Yersinia phage fHe-Yen9-03 (LT960552)	5	0	0																																			1
Aeromonas phage phiA8-29 (NC_048660)	5	0	0																																			1
Dickeya phage XF4 (KY942057)	5	0	0																																			1
Dickeya phage Ds16CZ (MN813050)	5	0	0																																			1
Dickeya phage phiDP10.3 (KM209270)	5	0	0																																			1
Dickeya phage PP35 (MG266157)	5	0	0																																			1
Dickeya phage Kamild (MH807812)	5	0	0																																			1
Dickeya phage Ds25CZ (MN813053)	5	0	0																																			1
Dickeya virus Limestone (NC_019925)	5	0	0																																			1
Salmonella phage SS3 (MK972698)	5	0	0																																			1
Salmonella phage SS9 (NC_049458)	5	0	0																																			1
Salmonella phage pSal-SNUABM-02 (MT857002)	5	0	0																																			1
Salmonella phage SKML-39 (NC_019910)	5	0	0																																			1
Salmonella phage vB_SenM_SilasIsHot (MW021760)	5	0	0																																			1
Salmonella phage Se_EM4 (LR811968)	5	0	0																																			1
Klebsiella phage Magnus (NC_049462)	5	0	0																																			1
Klebsiella phage vB_KpnM_Potts1 (MN013081)	5	0	0																																			1
Klebsiella phage PhiKpNIH-6 (MN395284)	5	0	0																																			1
Klebsiella phage AmPh_EK29 (MN434092)	5	0	0																																			1
Klebsiella phage vB_Kpn_F48 (NC_048694)	5	0	0																																			1
Klebsiella phage vB_KpnM_17-11 (MW239157)	5	0	0																																			1
Klebsiella phage vB_KpnM_311F (LR877331)	5	0	0																																			1
Klebsiella phage KPN2 HKu-2019 (MN101226)	5	0	0																																			1
Klebsiella phage vB_KpnM_BovinicusUrsus (MW021752)	5	0	0																																			1
Klebsiella phage vB_KpnM_KpV477 (NC_031087)	5	0	0																																			1
Klebsiella phage Marfa (NC_048798)	5	0	0																																			1
Klebsiella phage KP1 (MG751100)	5	0	0																																			1
Klebsiella phage Mineola (MH333064)	5	0	0																																			1
Klebsiella phage KPN1 (MN101225)	5	0	0																																			1
Klebsiella phage KPN6 (MN101230)	5	0	0																																			1
Klebsiella phage JD18 (NC_028686)	5	0	0																																			1
Cronobacter phage Pet-CM3-4 (LT614807)	5	0	0																																			1
Enterobacter phage vB_EhoM-IME523 (MN087708)	5	0	0																																			1
Klebsiella phage JIPh_Kp122 (MN434095)	5	0	0																																			1
Enterobacter phage vB_EclM_CIP9 (NC_048849)	5	0	0																																			1
Edwardsiella phage PEi26 (AP014715)	5	0	0																																			1
Edwardsiella phage PEi20 (NC_028683)	5	0	0																																			1
Enterobacter phage CC31 (NC_014662)	5	0	0																																			1
Klebsiella phage PKO111 (NC_031095)	5	0	0																																			1
Serratia phage PS2 (NC_024121)	5	0	0																																			1
Escherichia phage vB_EcoM_FB (MT682711)	5	0	0																																			1
Serratia phage CBH8 (MF036691)	5	0	0																																			1
Serratia phage CHI14 (NC_041996)	5	0	0																																			1
Serratia phage Muldoon (NC_049464)	5	0	0																																			1
Klebsiella phage KPV15 (KY000080)	5	0	0																																			1
Serratia phage 4S (MW082584)	5	0	0																																			1
Escherichia phage vb_EcoM-VR5 (NC_028881)	5	0	0																																			1
Citrobacter phage CkP1 (MW239124)	5	0	0																																			1
Shigella phage vB_SflM_004 (MK295205)	5	0	0																																			1
Escherichia phage vB_EcoM_OE5505 (MK373785)	5	0	0																																			1
Yersinia phage vB_YepM_ZN18 (MN716856)	5	0	0																																			1
Salmonella phage vB_SenS_Sergei (KY002061)	5	0	0																																			0
Salmonella phage Solent (MH586730)	5	0	0																																			0
Salmonella phage vB_SenS_Sasha (NC_047786)	5	0	0																																			0
Pseudomonas phage phiK7A1 (MT740307)	5	0	0																																			0
Salmonella phage vB_SenS-3 (MT004791)	5	0	0																																			0
Tenacibaculum phage PTm5 (AP019525)	5	0	0																																			0
Tenacibaculum phage PTm1 (NC_049340)	5	0	0																																			0
Citrobacter phage Miller (NC_025414)	5	0	0																																			0
Escherichia virus RB16 (NC_014467)	5	0	0																																			0
Salmonella phage S124 (NC_048013)	5	0	0																																			0
Salmonella phage vaffelhjerte (MT074452)	5	0	0																																			0
Salmonella phage misterkot (MT074453)	5	0	0																																			0
Salmonella phage polluks (MT074456)	5	0	0																																			0
Salmonella phage gmork (MT074463)	5	0	0																																			0
Salmonella phage S147 (NC_048012)	5	0	0																																			0
Salmonella phage rokbiter (NC_048868)	5	0	0																																			0
Pectobacterium phage My1 (NC_018837)	5	0	0																																			0
Providencia phage PSTCR6 (MW057858)	5	0	0																																			0
Salmonella phage ende (MT074454)	5	0	0																																			0
Salmonella phage bastian (NC_048870)	5	0	0																																			0
Pectobacterium phage DU_PP_V (NC_047887)	5	0	0																																			0
Salmonella phage falkor (MT074467)	5	0	0																																			0
Proteus phage Vb_PmiP-P59 (MT664722)	5	0	0																																			0
Proteus phage 3H10_20 (MT740244)	5	0	0																																			0
Escherichia phage flopper (NC_048845)	5	0	0																																			0
Serratia phage Slocum (MN095770)	5	0	0																																			0
Salmonella phage SPT-1 (JX181822)	5	0	0																																			0
Escherichia phage vB_EcoM_VR25 (NC_028925)	5	0	0																																			0
Escherichia phage UPEC01 (MW233709)	5	0	0																																			0
Vibrio phage vB_VpaP_MGD2 (MK820013)	5	0	0																																			0
Pelagibacter phage Kolga EXVC016S (MT375529)	5	0	0																																			0
Pseudomonas phage O4 (NC_031274)	5	0	0																																			0
Aeromonas phage PVN02 (LR813619)	5	0	0																																			0
Aeromonas phage PVN02 (MT623578)	5	0	0																																			0
Acinetobacter phage vB_AbaM_ME3 (NC_041884)	5	0	0																																			0
Escherichia phage MX01 (NC_031934)	5	0	0																																			0
Klebsiella phage Muenster (MT708547)	5	0	0																																			0
Ruegeria phage vB_RpoP-V13 (NC_049436)	5	0	0																																			0
Escherichia virus T4 (NC_000866)	5	0	0																																			0
Vibrio phage 1.046.O._10N.286.52.E3 (MG592428)	4	1	0														2,70E-08																					0
Salmonella phage SE131 (MG873442)	4	1	0																															1,10E-10				0
Salmonella phage 7-11 (NC_015938)	4	1	0																															1,10E-10				0
Salmonella phage pSal-SNUABM-01 (MW296032)	4	1	0																															7,50E-09				0
Vibrio phage 2E1 (KX507045)	4	1	0																																		8,50E-08	0
Ruegeria phage Tedan (MT764845)	4	1	1			9,10E-40																																0
Salicola phage SCTP-2 (MF360958)	4	1	1			4,00E-08																																0
Vibrio phage AG74 (MT460514)	4	1	1			2,10E-10																																0
Vibrio phage Cody (MT460515)	4	1	1			9,80E-10																																0
Vibrio phage ABurr (MW344056)	4	1	1			9,80E-10																																0
Pelagibacter phage HTVC115P (MN698247)	4	1	1			1,10E-13																																0
Synechococcus phage S-CAM8 (NC_021530)	4	1	1			5,60E-12																																0
Synechococcus phage S-CAM8 (KU686203)	4	1	1			1,50E-11																																0
Caulobacter phage Cr30 (NC_025422)	4	1	1			4,10E-11																																0
Synechococcus phage ACG-2014g (NC_026924)	4	1	1			9,70E-11																																0
Cyanophage S-RIM12 (KX349308)	4	1	1			1,20E-10																																0
Cyanophage S-RIM12 (KX349311)	4	1	1			1,20E-10																																0
Cyanophage S-RIM12 (KX349321)	4	1	1			1,20E-10																																0
Cyanophage S-RIM12 (KX349322)	4	1	1			1,20E-10																																0
Cyanophage S-RIM12 (KX349324)	4	1	1			1,20E-10																																0
Cyanophage S-RIM12 (KX349325)	4	1	1			1,20E-10																																0
Cyanophage S-RIM12 (KX349326)	4	1	1			1,20E-10																																0
Cyanophage S-RIM12 (KX349327)	4	1	1			1,20E-10																																0
Cyanophage S-RIM12 (NC_047715)	4	1	1			1,20E-10																																0
Cyanophage S-RIM12 (NC_047716)	4	1	1			1,20E-10																																0
Cyanophage S-RIM12 (NC_047717)	4	1	1			1,20E-10																																0
Salinivibrio phage CW02 (NC_019540)	4	1	1			4,10E-09																																0
Sphingomonas phage PAU (NC_019521)	4	1	1			4,10E-07																																0
Synechococcus phage S-CAM7 (MT586120)	4	1	1			1,40E-06																																0
Roseobacter phage DSS3P8 (KT870145)	4	0	0																																			2								2,00E-41		6,60E-09
Ruegeria phage vB_RpoS-V10 (MH015255)	4	0	0																																			2								2,00E-41		1,50E-08
Vibrio phage 1.033.O._10N.222.49.B8 (MG592417)	4	0	0																																			1
Cellulophaga phage phiST (KC821604)	4	0	0																																			1								6,80E-19
Cellulophaga phage phi19:2 (KC821621)	4	0	0																																			1								6,80E-19
Cellulophaga phage phiST (NC_020842)	4	0	0																																			1								6,80E-19
Cellulophaga phage phi13:1 (KC821625)	4	0	0																																			1								6,80E-19
Rhizobium phage RHph_I1_18 (MN988519)	4	0	0																																			1
Escherichia phage JN01 (MN882542)	4	0	0																																			1
Escherichia phage PEC04 (KR233165)	4	0	0																																			1
Salmonella phage pSe_SNUABM_01 (MN580668)	4	0	0																																			1
Escherichia phage UFV-AREG1 (NC_031030)	4	0	0																																			1
Erwinia phage vB_EamP_Frozen (NC_031062)	4	0	0																																			1								4,80E-46
Xanthomonas phage RiverRider (NC_048703)	4	0	0																																			1								2,10E-45
Stenotrophomonas phage Pokken (NC_049463)	4	0	0																																			1								1,80E-40
Dinoroseobacter phage vBDshPR2C (KJ803031)	4	0	0																																			1								1,80E-34
Dinoroseobacter phage DFL12phi1 (NC_024367)	4	0	0																																			1								2,60E-33
Vibrio phage Vp_R1 (MG603697)	4	0	0																																			1										8,50E-13
Serratia phage 2050H1 (MF285619)	4	0	0																																			1
Serratia phage phiMAM1 (NC_020083)	4	0	0																																			1
Vibrio phage VAP7 (NC_048765)	4	0	0																																			1
Serratia phage vB_SmaA_3M (NC_048736)	4	0	0																																			1
Dickeya phage phiDP23.1 (KM209320)	4	0	0																																			1
Dickeya phage Ds23CZ (MN813052)	4	0	0																																			1
Dickeya phage JA15 (KY942056)	4	0	0																																			1
Enterobacter phage EspM4VN (NC_049384)	4	0	0																																			1
Shigella phage MK-13 (NC_049455)	4	0	0																																			1
Salmonella phage P46FS4 (NC_049509)	4	0	0																																			1
Salmonella phage aagejoakim (NC_049503)	4	0	0																																			1
Salmonella phage SFP10 (NC_016073)	4	0	0																																			1
Salmonella phage Se-J (NC_049497)	4	0	0																																			1
Salmonella phage Sh19 (NC_019530)	4	0	0																																			1
Salmonella phage SenASZ3 (NC_049439)	4	0	0																																			1
Salmonella phage allotria (NC_049501)	4	0	0																																			1
Salmonella phage maane (NC_049508)	4	0	0																																			1
Salmonella phage S115 (MH370368)	4	0	0																																			1
Escherichia phage vB_EcoA_4HA11 (MN445184)	4	0	0																																			1
Salmonella phage S118 (NC_049437)	4	0	0																																			1
Salmonella phage rabagast (NC_049499)	4	0	0																																			1
Escherichia virus CBA120 (NC_016570)	4	0	0																																			1
Salmonella phage vB_SenM-2 (KX171211)	4	0	0																																			1
Salmonella phage STP07 (KY000003)	4	0	0																																			1
Salmonella phage S8 (KY630163)	4	0	0																																			1
Salmonella phage Se_AO1 (LR800396)	4	0	0																																			1
Salmonella phage Chennai (MN953776)	4	0	0																																			1
Salmonella phage kage (MT074476)	4	0	0																																			1
Salmonella phage SPHG3 (MW388005)	4	0	0																																			1
Salmonella phage Marshall (NC_022772)	4	0	0																																			1
Salmonella phage vB-SalM-SJ3 (NC_024122)	4	0	0																																			1
Salmonella phage Det7 (NC_027119)	4	0	0																																			1
Salmonella phage GG32 (NC_031045)	4	0	0																																			1
Salmonella phage vB-SalM-PM10 (NC_031128)	4	0	0																																			1
Salmonella phage STML-13-1 (NC_042061)	4	0	0																																			1
Salmonella phage ST-W77 (NC_049378)	4	0	0																																			1
Salmonella phage BSP101 (NC_049382)	4	0	0																																			1
Salmonella phage SP1 (NC_049396)	4	0	0																																			1
Escherichia phage FEC14 (NC_049427)	4	0	0																																			1
Escherichia phage EP75 (NC_049433)	4	0	0																																			1
Salmonella phage SenALZ1 (NC_049440)	4	0	0																																			1
Salmonella phage Se-B (NC_049495)	4	0	0																																			1
Salmonella phage Se-G (NC_049496)	4	0	0																																			1
Salmonella phage pertopsoe (NC_049507)	4	0	0																																			1
Salmonella phage Se_EM3 (LR811969)	4	0	0																																			1
Salmonella phage BPS7 (MW355478)	4	0	0																																			1
Salmonella phage Mutine (NC_049428)	4	0	0																																			1
Salmonella phage moki (NC_049506)	4	0	0																																			1
Salmonella phage bering (NC_049502)	4	0	0																																			1
Serratia phage vB-Sru-IME250 (KY073123)	4	0	0																																			1
Serratia phage vB-Sru-IME250 (NC_042047)	4	0	0																																			1
Escherichia phage PhaxI (NC_019452)	4	0	0																																			1
Salmonella phage vB_SalM-LPST94 (MH523359)	4	0	0																																			1
Salmonella phage Se_EM1 (LR811967)	4	0	0																																			1
Salmonella phage S117 (MH370370)	4	0	0																																			1
Salmonella phage Mooltan (MH688040)	4	0	0																																			1
Escherichia phage vB_EcoM_3HA11 (MN342150)	4	0	0																																			1
Salmonella phage ISTP3 (MT974436)	4	0	0																																			1
Salmonella phage vB_SenM_AR2819 (MW021753)	4	0	0																																			1
Citrobacter phage vB_CfrM_Sajous1 (MW021757)	4	0	0																																			1
Salmonella phage BPS6 (MW355450)	4	0	0																																			1
Salmonella phage BPS3 (MW355475)	4	0	0																																			1
Salmonella phage BPS5 (MW355477)	4	0	0																																			1
Salmonella phage Maynard (NC_022768)	4	0	0																																			1
Salmonella phage vB-SalM-SJ2 (NC_023856)	4	0	0																																			1
Salmonella phage SeSz-1 (NC_049443)	4	0	0																																			1
Salmonella phage heyday (NC_049500)	4	0	0																																			1
Salmonella phage dinky (NC_049504)	4	0	0																																			1
Salmonella phage SE14 (NC_049512)	4	0	0																																			1
Klebsiella virus 0507KN21 (NC_022343)	4	0	0																																			1
Klebsiella phage Menlow (NC_047901)	4	0	0																																			1
Klebsiella phage vB_KpnM_KpS110 (NC_047932)	4	0	0																																			1
Klebsiella virus UPM 2146 (NC_049472)	4	0	0																																			1
Escherichia phage EcS1 (LC371242)	4	0	0																																			1
Escherichia phage vB_EcoM_KWBSE43-6 (NC_048186)	4	0	0																																			1
Klebsiella phage May (NC_047900)	4	0	0																																			1
Salmonella phage barely (NC_049505)	4	0	0																																			1
Escherichia phage vB_EcoM_Sa157lw (MH427377)	4	0	0																																			1
Salmonella phage PS5 (MH940212)	4	0	0																																			1
Salmonella phage Matapan (MN066127)	4	0	0																																			1
Salmonella phage GEC_vB_GOT (MW006476)	4	0	0																																			1
Salmonella phage GEC_vB_N6 (MW006480)	4	0	0																																			1
Salmonella phage vB_SenM_FrontPhageNews (MW021754)	4	0	0																																			1
Salmonella virus ViI (NC_015296)	4	0	0																																			1
Escherichia phage ECML-4 (NC_025446)	4	0	0																																			1
Klebsiella phage vB_KpnM_GF (MK421971)	4	0	0																																			1
Klebsiella phage KPN5 (MN101229)	4	0	0																																			1
Aeromonas phage Asfd_1 (MK577502)	4	0	0																																			1
Erwinia phage phiEa2809 (NC_027340)	4	0	0																																			1
Citrobacter phage Moon (NC_027331)	4	0	0																																			1
Escherichia phage SF (MH359124)	4	0	0																																			1
Citrobacter phage Merlin (NC_028857)	4	0	0																																			1
Citrobacter phage CF1 ERZ-2017 (NC_042067)	4	0	0																																			1
Escherichia phage vB_EcoM_SP1 (MT682709)	4	0	0																																			1
Enterobacteria phage Kha5h (KT184312)	4	0	0																																			1
Escherichia phage PP01 (LC348379)	4	0	0																																			1
Shigella phage vB_SsoM_113 (LR746311)	4	0	0																																			1
Escherichia phage EC121 (MF001359)	4	0	0																																			1
Citrobacter phage vB_CroM_CrRp10 (MG775043)	4	0	0																																			1
Enterobacteria phage vB_EcoM_IME339 (MH051915)	4	0	0																																			1
Enterobacteria phage vB_EcoM_IME340 (MH051916)	4	0	0																																			1
Escherichia phage vB_EcoM_DalCa (MH992510)	4	0	0																																			1
Escherichia phage D5505 (MK327929)	4	0	0																																			1
Escherichia phage EcNP1 (MK886800)	4	0	0																																			1
Shigella phage Sfk20 (MW341595)	4	0	0																																			1
Shigella phage pSs-1 (NC_025829)	4	0	0																																			1
Shigella phage Sf21 (NC_042077)	4	0	0																																			1
Escherichia phage vB_EcoM_G50 (MK327942)	4	0	0																																			1
Escherichia phage ime09 (NC_019503)	4	0	0																																			1
Salmonella phage SP069 (NC_042062)	4	0	0																																			0
Salmonella phage 9NA (NC_025443)	4	0	0																																			0
Proteus phage vB_PmiP_RS10pmA (MG575420)	4	0	0																																			0
Vibrio phage LP.2 (MK249871)	4	0	0																																			0
Vibrio phage phiV208 (MT227924)	4	0	0																																			0
Vibrio phage 1.285.O._10N.286.55.C12 (MG592655)	4	0	0																																			0
Vibrio phage 1.088.O._10N.261.46.A1 (MG592463)	4	0	0																																			0
Vibrio phage 1.024.O._10N.261.45.F8 (MG592408)	4	0	0																																			0
Proteus phage 2207-N35 (MN840487)	4	0	0																																			0
Salmonella phage SSU5 (NC_018843)	4	0	0																																			0
Dinoroseobacter phage vB_DshS-R5C (NC_041921)	4	0	0																																			0
Curvibacter phage P26059A (KY981271)	4	0	0																																			0
Yersinia phage phiR2-01 (NC_019919)	4	0	0																																			0
Salmonella phage Shivani (NC_028754)	4	0	0																																			0
Escherichia phage vB_EcoS_HdH2 (NC_048748)	4	0	0																																			0
Escherichia virus T5 (AY587007)	4	0	0																																			0
Escherichia virus T5 (AY692264)	4	0	0																																			0
Escherichia phage vB_EcoS_HASG4 (MK373797)	4	0	0																																			0
Escherichia phage vB_EcoS_EASG3 (MK373799)	4	0	0																																			0
Salmonella phage SP01 (NC_047859)	4	0	0																																			0
Salmonella phage vB_SalS_SA001 (MN445182)	4	0	0																																			0
Salmonella phage 100268_sal2 (NC_031902)	4	0	0																																			0
Phage NBSal002 (MN994501)	4	0	0																																			0
Bacteriophage T5-like chee130_1 (MF431736)	4	0	0																																			0
Bacteriophage T5-like poul149 (MF431738)	4	0	0																																			0
Bacteriophage T5-like chee158 (MF431739)	4	0	0																																			0
Bacteriophage T5-like cott162 (MF431740)	4	0	0																																			0
Bacteriophage T5-like saus176N (MF431741)	4	0	0																																			0
Salmonella virus Stitch (NC_027297)	4	0	0																																			0
Escherichia phage saus132 (NC_047884)	4	0	0																																			0
Bacteriophage T5-like pork27 (MF431731)	4	0	0																																			0
Bacteriophage T5-like pork29 (MF431732)	4	0	0																																			0
Bacteriophage T5-like saus47N (MF431733)	4	0	0																																			0
Bacteriophage T5-like saus111K (MF431734)	4	0	0																																			0
Bacteriophage T5-like poul124 (MF431735)	4	0	0																																			0
Escherichia phage chee24 (NC_047885)	4	0	0																																			0
Salmonella phage L6jm (NC_048852)	4	0	0																																			0
Phage NBEco001 (NC_048853)	4	0	0																																			0
Phage NBSal003 (NC_048856)	4	0	0																																			0
Phage NBSal005 (NC_048857)	4	0	0																																			0
Phage NBEco002 (NC_048855)	4	0	0																																			0
Klebsiella phage vB_Kpn_IME260 (NC_041899)	4	0	0																																			0
Klebsiella phage KpGranit (MN163280)	4	0	0																																			0
Vibrio phage vB_VmeM-Yong XC31 (MK308674)	4	0	0																																			0
Vibrio phage vB_VmeM-Yong XC32 (MK308675)	4	0	0																																			0
Vibrio phage vB_VmeM-Yong MS31 (MK308676)	4	0	0																																			0
Vibrio phage vB_VmeM-Yong MS32 (MK308677)	4	0	0																																			0
Vibrio phage AS51 (NC_047737)	4	0	0																																			0
Salmonella phage NR01 (NC_031042)	4	0	0																																			0
Salmonella virus SPC35 (NC_015269)	4	0	0																																			0
Shigella phage SSP1 (NC_047881)	4	0	0																																			0
Citrobacter phage IME-CF2 (NC_029013)	4	0	0																																			0
Salmonella phage atrejo (NC_048872)	4	0	0																																			0
Escherichia phage vB_EcoS_VAH1 (MK373792)	4	0	0																																			0
Salmonella phage 3sent1 (MT653143)	4	0	0																																			0
Salmonella phage GEC_vB_N5 (MW006479)	4	0	0																																			0
Escherichia virus T5 (NC_005859)	4	0	0																																			0
Escherichia phage vB_Eco_mar004NP2 (NC_048205)	4	0	0																																			0
Escherichia phage SP15 (NC_048627)	4	0	0																																			0
Salmonella phage bobsandoy (MT074464)	4	0	0																																			0
Salmonella phage vB_SenS_SB10 (MK947458)	4	0	0																																			0
Salmonella phage SE7 (MK972708)	4	0	0																																			0
Salmonella phage 9-29 (MN218190)	4	0	0																																			0
Salmonella phage beppo (MT074455)	4	0	0																																			0
Salmonella phage smaug (MT074461)	4	0	0																																			0
Escherichia coli phage vB_EcoS_Ace (MT833283)	4	0	0																																			0
Salmonella phage GEC_vB_N3 (MW006478)	4	0	0																																			0
Salmonella phage GEC_vB_N7 (MW006481)	4	0	0																																			0
Salmonella phage SP76 (MW206381)	4	0	0																																			0
Phage vB_SabS_Sds2 (MW357609)	4	0	0																																			0
Salmonella phage 118970_sal2 (NC_031933)	4	0	0																																			0
Salmonella phage LVR16A (NC_048000)	4	0	0																																			0
Salmonella phage S113 (NC_048005)	4	0	0																																			0
Salmonella phage S126 (NC_048008)	4	0	0																																			0
Salmonella phage S132 (NC_048010)	4	0	0																																			0
Salmonella phage Sw2 (NC_048062)	4	0	0																																			0
Salmonella phage 3-29 (NC_048145)	4	0	0																																			0
Escherichia phage vB_Eco_mar003J3 (NC_048203)	4	0	0																																			0
Salmonella phage vB_SenS_SB13 (NC_048781)	4	0	0																																			0
Salmonella phage OSY-STA (NC_048808)	4	0	0																																			0
Salmonella phage 1-29 (NC_048811)	4	0	0																																			0
Salmonella phage 1-19 (NC_048819)	4	0	0																																			0
Escherichia virus DT57C (NC_027356)	4	0	0																																			0
Enterobacteria phage DT571/2 (NC_047749)	4	0	0																																			0
Escherichia phage Gostya9 (NC_047979)	4	0	0																																			0
Salmonella phage BSP22A (KY787212)	4	0	0																																			0
Salmonella phage vB_SenS_SB9 (MK867835)	4	0	0																																			0
Salmonella phage SE18 (MK972717)	4	0	0																																			0
Salmonella phage rutana (MT074468)	4	0	0																																			0
Salmonella phage S116 (NC_048007)	4	0	0																																			0
Salmonella phage Seafire (NC_048110)	4	0	0																																			0
Salmonella phage SE24 (NC_048785)	4	0	0																																			0
Salmonella phage faergetype (NC_048867)	4	0	0																																			0
Salmonella phage STG2 (NC_048089)	4	0	0																																			0
Salmonella phage Seabear (MK728824)	4	0	0																																			0
Salmonella phage vB_SenS_SB6 (MK809530)	4	0	0																																			0
Salmonella phage SE19 (MK972704)	4	0	0																																			0
Salmonella phage SE20 (MK972709)	4	0	0																																			0
Salmonella phage phagemcphageface (MT074447)	4	0	0																																			0
Salmonella phage 8sent1748 (MT653146)	4	0	0																																			0
Salmonella phage SH9 (NC_047999)	4	0	0																																			0
Salmonella phage 1-23 (NC_048149)	4	0	0																																			0
Salmonella phage bombadil (NC_048866)	4	0	0																																			0
Salmonella phage fuchur (NC_048869)	4	0	0																																			0
Salmonella phage oselot (NC_048871)	4	0	0																																			0
Escherichia phage T5_ev219 (LR597655)	4	0	0																																			0
Escherichia phage T5_ev212 (LR597659)	4	0	0																																			0
Salmonella phage S130 (MH370377)	4	0	0																																			0
Salmonella phage SE8 (MK972716)	4	0	0																																			0
Salmonella phage vB_Sen-E22 (MT311645)	4	0	0																																			0
Salmonella phage vB_SalS_ABTNLsp4 (MW149273)	4	0	0																																			0
Salmonella phage vB_SalS_ABTNLsp9 (MW149275)	4	0	0																																			0
Escherichia phage vB_EcoS_AKFV33 (NC_017969)	4	0	0																																			0
Escherichia phage vB_EcoS_FFH_1 (NC_024139)	4	0	0																																			0
Escherichia phage slur09 (NC_028840)	4	0	0																																			0
Escherichia phage phiAPCEc03 (NC_047754)	4	0	0																																			0
Escherichia phage phiLLS (NC_047822)	4	0	0																																			0
Escherichia phage OSYSP (NC_047835)	4	0	0																																			0
Salmonella phage SP3 (NC_048001)	4	0	0																																			0
Salmonella phage S131 (NC_048009)	4	0	0																																			0
Escherichia phage fp01 (NC_048731)	4	0	0																																			0
Salmonella phage SE11 (NC_048786)	4	0	0																																			0
Salmonella virus VSe12 (NC_048794)	4	0	0																																			0
Escherichia virus VEc33 (NC_048818)	4	0	0																																			0
Salmonella phage oldekolle (NC_048865)	4	0	0																																			0
Escherichia phage vB_EcoS-26175I (MK907267)	4	0	0																																			0
Escherichia phage vB_EcoS-26175II (MK907268)	4	0	0																																			0
Escherichia phage vB_EcoS-26175III (MK907269)	4	0	0																																			0
Escherichia phage vB_EcoS-26175IV (MK907270)	4	0	0																																			0
Escherichia phage vB_EcoS-26175V (MK907271)	4	0	0																																			0
Salmonella phage bux (MT074460)	4	0	0																																			0
Salmonella phage vB STyj5-1 (MW423798)	4	0	0																																			0
Salmonella phage 2-3 (NC_048809)	4	0	0																																			0
Salmonella phage Sepoy (NC_048760)	4	0	0																																			0
Salmonella phage SP_Thor (MW411578)	4	0	0																																			0
Salmonella phage S114 (NC_048006)	4	0	0																																			0
Salmonella phage S133 (NC_048011)	4	0	0																																			0
Salmonella phage Th1 (NC_048795)	4	0	0																																			0
Klebsiella phage vB_KpnS_FZ41 (MK521907)	4	0	0																																			0
Klebsiella phage JIPh_Kp127 (MN434096)	4	0	0																																			0
Klebsiella phage AmPh_EK80 (MN434094)	4	0	0																																			0
Klebsiella phage Sugarland (NC_042093)	4	0	0																																			0
Klebsiella phage vB_Kpn_B01 (MT380195)	4	0	0																																			0
Klebsiella phage KPN4 (MN101228)	4	0	0																																			0
Klebsiella phage Spivey (MK630230)	4	0	0																																			0
Bacteriophage Eos (MN478377)	4	0	0																																			0
Escherichia phage phiEcoM-GJ1 (NC_010106)	4	0	0																																			0
Escherichia phage ST32 (NC_047830)	4	0	0																																			0
Shigella phage SHSML-45 (NC_031022)	4	0	0																																			0
Escherichia virus EPS7 (NC_010583)	4	0	0																																			0
Escherichia phage vB_EcoP_Bp7 (MN117721)	4	0	0																																			0
Erwinia phage Faunus (NC_047978)	4	0	0																																			0
Providencia phage vB_PreS_PR1 (NC_041913)	4	0	0																																			0
Providencia phage PSTCR5 (MW057857)	4	0	0																																			0
Citrobacter phage CVT22 (NC_027988)	4	0	0																																			0
Acinetobacter phage BS46 (MN276049)	4	0	0																																			0
Ralstonia phage RP31 (AP017925)	4	0	0																																			0
Ralstonia phage RP12 (NC_041911)	4	0	0																																			0
Pelagibacter phage HTVC021P (MH579717)	4	0	0																																			0
Pelagibacter phage HTVC031P (MH598800)	4	0	0																																			0
Rhizobium phage RHEph01 (NC_047738)	4	0	0																																			0
Rhizobium phage vB_RleA_TRX32-1 (MW023914)	4	0	0																																			0
Pelagibacter phage Eistla EXVC025P (MT375521)	4	0	0																																			0
Pelagibacter phage HTVC022P (MH598798)	4	0	0																																			0
Pelagibacter phage HTVC121P (MH598803)	4	0	0																																			0
Pelagibacter phage HTVC019P (NC_020483)	4	0	0																																			0
Pelagibacter phage HTVC105P (MH598804)	4	0	0																																			0
Pelagibacter phage HTVC201P (MH598802)	4	0	0																																			0
Pelagibacter phage Jormungand EXVC012P (MT375528)	4	0	0																																			0
Pelagibacter phage Ran EXVC014P (MT375530)	4	0	0																																			0
Pseudomonas phage Njord (NC_047954)	4	0	0																																			0
Pelagibacter phage HTVC109P (MH598805)	4	0	0																																			0
Pseudomonas phage Nerthus (NC_047955)	4	0	0																																			0
Pseudomonas phage BUCT553 (MT941682)	4	0	0																																			0
Pseudomonas phage Alpheus (NC_047957)	4	0	0																																			0
Pseudomonas phage Achelous (NC_047956)	4	0	0																																			0
Aeromonas phage HJG (MK455770)	4	0	0																																			0
Escherichia phage Penshu1 (MK903281)	4	0	0																																			0
Aeromonas phage MJG (MK455769)	4	0	0																																			0
Vibrio phage Vp670 (NC_047803)	4	0	0																																			0
Pelagibacter phage HTVC120P (MH598807)	4	0	0																																			0
Pelagibacter phage Bylgja EXVC010P (MT375520)	4	0	0																																			0
Pelagibacter phage Himinglaeva EXVC011P (MT375526)	4	0	0																																			0
Pelagibacter phage Hroenn EXVC015P (MT375527)	4	0	0																																			0
Pelagibacter phage Unn EXVC019P (MT375531)	4	0	0																																			0
Vibrio phage VP-HS15 (MN807240)	4	0	0																																			0
Vibrio phage Vc1 (NC_047746)	4	0	0																																			0
Vibrio phage VEN (NC_047903)	4	0	0																																			0
Pseudomonas phage uligo (NC_047894)	4	0	0																																			0
Escherichia phage LL11 (NC_048064)	4	0	0																																			0
Escherichia virus VEc3 (NC_047899)	4	0	0																																			0
Escherichia phage UAB_Phi78 (NC_020414)	4	0	0																																			0
Escherichia phage vB_EcoP_R4596 (MK373771)	4	0	0																																			0
Escherichia phage Mt1B1_P10 (MT496971)	4	0	0																																			0
Salmonella phage BP12B (NC_031271)	4	0	0																																			0
Escherichia phage vB_EcoP_ACG-C91 (NC_019403)	4	0	0																																			0
Escherichia virus K1E (KY435490)	4	0	0																																			0
Escherichia virus K1E (NC_007637)	4	0	0																																			0
Escherichia virus K1-5 (NC_008152)	4	0	0																																			0
Escherichia virus AAPEc6 (NC_047769)	4	0	0																																			0
Proteus phage PM 116 (NC_047858)	4	0	0																																			0
Escherichia phage vB_EcoP_B (NC_047806)	4	0	0																																			0
Proteus phage vB_PmiP_Pm5460 (NC_028916)	4	0	0																																			0
Proteus phage PM 93 (NC_027390)	4	0	0																																			0
Proteus phage PM 85 (NC_027379)	4	0	0																																			0
Escherichia virus mutPK1A2 (NC_047889)	4	0	0																																			0
Escherichia phage vB_EcoP_C (NC_047807)	4	0	0																																			0
Escherichia phage vB_EcoP_D (KY295893)	4	0	0																																			0
Escherichia phage vB_EcoP_R (KY295899)	4	0	0																																			0
Salmonella virus SP6 (AY370673)	4	0	0																																			0
Salmonella virus SP6 (NC_004831)	4	0	0																																			0
Marinomonas phage CPG1g (KY626177)	4	0	0																																			0
Marinomonas phage CPP1m (NC_047821)	4	0	0																																			0
Marinomonas phage CB5A (NC_047836)	4	0	0																																			0
Escherichia phage vB_EcoP_KAW1A4500 (MK373773)	4	0	0																																			0
Lelliottia phage phD2B (NC_025450)	4	0	0																																			0
Klebsiella phage K1-ULIP33 (MK380014)	4	0	0																																			0
Klebsiella phage vB_KpP_FBKp16 (MW394389)	4	0	0																																			0
Pectobacterium phage PP1 (NC_019542)	4	0	0																																			0
Proteus phage PmP19 (MT680615)	4	0	0																																			0
Pectobacterium phage POP72 (KY744566)	4	0	0																																			0
Podovirus Lau218 (KJ183192)	4	0	0																																			0
Podovirus Lau218 (NC_024329)	4	0	0																																			0
Citrobacter phage vB_CroP_CrRp3 (NC_047920)	4	0	0																																			0
Escherichia phage CMSTMSU (MH494197)	4	0	0																																			0
Bacillus phage BCP8-2 (NC_027355)	4	0	0																																			0
Escherichia phage vB_EcoM_112 (NC_024125)	4	0	0																																			0
Bacillus phage PK16 (KX495186)	4	0	0																																			0
Bacillus phage BCP01 (MG602477)	4	0	0																																			0
Pseudoalteromonas phage pYD6-A (NC_020849)	4	0	0																																			0
Shigella phage SHFML-11 (NC_030953)	4	0	0																																			0
Salmonella phage vB_SenM-S16 (NC_020416)	4	0	0																																			0
Salmonella phage SG1 (MF001354)	4	0	0																																			0
Escherichia phage vB_EcoM_F1 (MT682712)	4	0	0																																			0
Escherichia phage HY03 (NC_031047)	4	0	0																																			0
Escherichia phage vB_EcoM_G8 (MK373787)	4	0	0																																			0
Vibrio phage Phriendly (MN062185)	4	0	0																																			0
Vibrio phage VPp1 (KJ936628)	4	0	0																																			0
Vibrio phage vB_ValP_IME271 (MF431726)	4	0	0																																			0
Pseudomonas phage IME180 (MF788075)	4	0	0																																			0
Aeromonas phage pAh6-C (NC_025459)	4	0	0																																			0
Vibrio phage RYC (AP014858)	4	0	0																																			0
Escherichia phage SP27 (LC494302)	4	0	0																																			0
Escherichia phage PBECO4 (NC_027364)	4	0	0																																			0
Escherichia phage 121Q (NC_025447)	4	0	0																																			0
Escherichia phage Ecwhy_1 (MH791411)	4	0	0																																			0
Escherichia phage QL01 (NC_028847)	4	0	0																																			0
Escherichia phage vB_EcoM_phAPEC6 (MK817115)	4	0	0																																			0
Escherichia phage vB_Eco_slurp01 (LT603033)	4	0	0																																			0
Escherichia phage UB (MH383160)	4	0	0																																			0
Escherichia phage vB_EcoM_G17 (MK327931)	4	0	0																																			0
Escherichia phage Bp7 (NC_019500)	4	0	0																																			0
Enterobacteria phage IME08 (NC_014260)	4	0	0																																			0
Escherichia phage WG01 (NC_031928)	4	0	0																																			0
Salmonella phage vB_SalM_ABTNLsp5 (MW149274)	4	0	0																																			0
Escherichia phage AnYang (MK234886)	4	0	0																																			0
Enterobacteria phage vB_EcoM_IME540 (MT150133)	4	0	0																																			0
Enterobacteria phage vB_EcoM_IME341 (MH051917)	4	0	0																																			0
Phage NC-G (MK310184)	4	0	0																																			0
Enterobacteria phage vB_EcoM_IME281 (MH051913)	4	0	0																																			0
Escherichia phage EcWhh-1 (MH791409)	4	0	0																																			0
Escherichia phage JS98 (NC_010105)	4	0	0																																			0
Escherichia phage JS10 (NC_012741)	4	0	0																																			0
Escherichia phage dhaeg (MN850609)	4	0	0																																			0
Escherichia phage dhabil (MN850621)	4	0	0																																			0
Roseobacter phage RD-1410Ws-07 (KU885990)	4	0	0																																			0
Dinoroseobacter phage DS-1410Ws-06 (NC_049371)	4	0	0																																			0
Vibrio phage 2.275.O._10N.286.54.E11 (MG592671)	4	0	0																																			0
Klebsiella phage vB_KleM_RaK2 (NC_019526)	4	0	0																																			0
Klebsiella phage K64-1 (NC_027399)	4	0	0																																			0
Sulfitobacter phage phiCB2047-B (NC_020862)	4	0	0																																			0
Bacillus phage vB_BcoS-136 (MH884508)	4	0	0																																			0
Lactococcus phage LW81 (NC_049855)	4	0	0																																			0
Bacillus phage JBP901 (NC_027352)	4	0	0																																			0
Bacillus phage Mater (NC_027366)	4	0	0																																			0
Bacillus phage Moonbeam (NC_027374)	4	0	0																																			0
Vibrio phage VBP47 (NC_020848)	4	0	0																																			0
Vibrio phage VBP32 (NC_020868)	4	0	0																																			0
Pantoea phage vB_PagS_AAS21 (MK770119)	4	0	0																																			0
Proteus phage 2 (MT679222)	4	0	0																																			0
Proteus phage 1 (MT679223)	4	0	0																																			0
Proteus phage M4H10_20 (MT740245)	4	0	0																																			0
Proteus phage Stubb (NC_048086)	4	0	0																																			0
Xanthomonas phage Xoo-sp13 (MN047793)	4	0	0																																			0
Xanthomonas phage XacN1 (AP018399)	4	0	0																																			0
Vibrio phage VspSw_1 (NC_048151)	4	0	0																																			0
Acidovorax phage ACP17 (NC_041997)	4	0	0																																			0
Shigella phage Sf25 (MF327009)	4	0	0																																			0
Escherichia phage YUEEL01 (KY290975)	4	0	0																																			0
Escherichia phage CF2 (NC_041919)	4	0	0																																			0
Salmonella phage STP4-a (NC_026607)	4	0	0																																			0
Escherichia phage vB_EcoM-G28 (MG867727)	4	0	0																																			0
Yersinia phage fPS-65 (LR215724)	4	0	0																																			0
Enterobacteria phage T2 (AP018813)	4	0	0																																			0
Escherichia phage T2 (LC348380)	4	0	0																																			0
Escherichia phage T2 (MH751506)	4	0	0																																			0
Salmonella phage STML-198 (NC_027344)	4	0	0																																			0
Escherichia phage PE37 (KU925172)	4	0	0																																			0
Escherichia phage vB_EcoM_G9062 (MK373779)	4	0	0																																			0
Escherichia phage JEP6 (MT764206)	4	0	0																																			0
Escherichia phage T4_ev240 (LR597657)	4	0	0																																			0
Shigella phage vB_SsoM_JK08 (LR877332)	4	0	0																																			0
Escherichia phage vB_EcoM-fFiEco06 (MG781190)	4	0	0																																			0
Escherichia phage vB_EcoM-fHoEco02 (MG781191)	4	0	0																																			0
Escherichia phage vB_EcoM_G29 (MK327940)	4	0	0																																			0
Escherichia phage vB_EcoM_G4500 (MK327945)	4	0	0																																			0
Shigella phage JK23 (MK962752)	4	0	0																																			0
Serratia phage PhiZZ30 (MT176426)	4	0	0																																			0
Shigella phage Sf24 (NC_042078)	4	0	0																																			0
Escherichia phage vB_EcoM_G2540 (MK327936)	4	0	0																																			0
Enterobacteria phage T4T (HM137666)	4	0	0																																			0
Enterobacteria phage RB55 (KM607002)	4	0	0																																			0
Enterobacteria phage RB59 (KM607003)	4	0	0																																			0
Escherichia phage T4 (MT984581)	4	0	0																																			0
Escherichia phage vB_EcoM_ACG-C40 (NC_019399)	4	0	0																																			0
Escherichia phage vB_EcoM_JB75 (MH355584)	4	0	0																																			0
Escherichia phage vB_EcoM_FT (MT682710)	4	0	0																																			0
Escherichia phage slur08 (LN881733)	4	0	0																																			0
Escherichia phage slur14 (NC_028448)	4	0	0																																			0
Escherichia phage slur03 (NC_042129)	4	0	0																																			0
Escherichia phage vB_EcoM_Lutter (MT682714)	4	0	0																																			0
Roseobacter phage RD-1410W1-01 (NC_049372)	4	0	0																																			0
Vibrio phage 1.135.O._10N.222.54.B6 (MG592506)	3	1	0																																		1,00E-07	0
Escherichia phage ECBP2 (NC_018859)	3	1	0																															9,40E-09				0
Escherichia phage EK010 (LC553734)	3	1	0																															1,10E-08				0
Xanthomonas phage Xp15 (NC_007024)	3	1	1			2,70E-12																																1								3,10E-33
Achromobacter phage JWF (NC_029075)	3	1	1					1,30E-36																														1								2,00E-37
Vibrio phage 1.223.O._10N.261.48.A9 (MG592590)	3	1	1			1,40E-10																																0
Synechococcus phage S-B05 (MK799832)	3	1	1			7,20E-13																																0
Synechococcus phage ACG-2014d (KJ019113)	3	1	1			1,40E-11																																0
Vibrio phage Cilsick (MN966730)	3	1	1			2,10E-10																																0
Vibrio phage Chester (MN966732)	3	1	1			2,10E-10																																0
Vibrio phage Gary (MW344054)	3	1	1			2,10E-10																																0
Vibrio phage GRLPWR (MW344055)	3	1	1			2,10E-10																																0
Vibrio phage River4 (MT448617)	3	1	1			2,20E-10																																0
Vibrio phage Thalassa (NC_042095)	3	1	1			2,30E-10																																0
Vibrio phage Ceto (NC_042094)	3	1	1			6,90E-10																																0
Vibrio phage phi 3 (NC_028895)	3	1	1			3,00E-09																																0
Synechococcus phage S-B43 (MN018232)	3	1	1			7,20E-13																																0
Synechococcus phage ACG-2014d (KJ019056)	3	1	1			3,30E-12																																0
Prochlorococcus phage P-SSM7 (NC_015290)	3	1	1			7,30E-12																																0
Synechococcus phage S-B64 (MH107246)	3	1	1			7,50E-12																																0
Synechococcus phage ACG-2014d (KJ019028)	3	1	1			1,40E-11																																0
Synechococcus phage ACG-2014d (KJ019029)	3	1	1			1,40E-11																																0
Synechococcus phage ACG-2014d (KJ019031)	3	1	1			1,40E-11																																0
Synechococcus phage ACG-2014d (KJ019032)	3	1	1			1,40E-11																																0
Synechococcus phage ACG-2014d (KJ019034)	3	1	1			1,40E-11																																0
Synechococcus phage ACG-2014d (KJ019046)	3	1	1			1,40E-11																																0
Synechococcus phage ACG-2014d (KJ019047)	3	1	1			1,40E-11																																0
Synechococcus phage ACG-2014d (KJ019048)	3	1	1			1,40E-11																																0
Synechococcus phage ACG-2014d (KJ019050)	3	1	1			1,40E-11																																0
Synechococcus phage ACG-2014d (KJ019057)	3	1	1			1,40E-11																																0
Synechococcus phage ACG-2014d (KJ019062)	3	1	1			1,40E-11																																0
Synechococcus phage ACG-2014d (KJ019070)	3	1	1			1,40E-11																																0
Synechococcus phage ACG-2014d (KJ019072)	3	1	1			1,40E-11																																0
Synechococcus phage ACG-2014d (KJ019073)	3	1	1			1,40E-11																																0
Synechococcus phage ACG-2014d (KJ019074)	3	1	1			1,40E-11																																0
Synechococcus phage ACG-2014d (KJ019075)	3	1	1			1,40E-11																																0
Synechococcus phage ACG-2014d (KJ019080)	3	1	1			1,40E-11																																0
Synechococcus phage ACG-2014d (KJ019112)	3	1	1			1,40E-11																																0
Synechococcus phage ACG-2014d (KJ019115)	3	1	1			1,40E-11																																0
Synechococcus phage ACG-2014d (KJ019117)	3	1	1			1,40E-11																																0
Synechococcus phage ACG-2014d (KJ019119)	3	1	1			1,40E-11																																0
Synechococcus phage ACG-2014d (KJ019120)	3	1	1			1,40E-11																																0
Synechococcus phage ACG-2014d (KJ019121)	3	1	1			1,40E-11																																0
Synechococcus phage ACG-2014d (KJ019124)	3	1	1			1,40E-11																																0
Synechococcus phage ACG-2014d (KJ019125)	3	1	1			1,40E-11																																0
Synechococcus phage ACG-2014d (KJ019126)	3	1	1			1,40E-11																																0
Synechococcus phage ACG-2014d (KJ019127)	3	1	1			1,40E-11																																0
Synechococcus phage ACG-2014d (KJ019130)	3	1	1			1,40E-11																																0
Synechococcus phage ACG-2014d (KJ019140)	3	1	1			1,40E-11																																0
Synechococcus phage ACG-2014d (KJ019160)	3	1	1			1,40E-11																																0
Synechococcus phage ACG-2014d (KJ019164)	3	1	1			1,40E-11																																0
Synechococcus phage ACG-2014d (KJ019165)	3	1	1			1,40E-11																																0
Synechococcus phage ACG-2014d (NC_026923)	3	1	1			1,40E-11																																0
Synechococcus phage ACG-2014d (KJ019036)	3	1	1			1,40E-11																																0
Synechococcus phage ACG-2014d (KJ019078)	3	1	1			1,40E-11																																0
Synechococcus phage ACG-2014d (KJ019083)	3	1	1			1,40E-11																																0
Synechococcus phage ACG-2014d (KJ019118)	3	1	1			1,40E-11																																0
Synechococcus phage ACG-2014d (KJ019129)	3	1	1			1,40E-11																																0
Synechococcus phage ACG-2014d (KJ019162)	3	1	1			1,40E-11																																0
Synechococcus phage S-SKS1 (NC_020851)	3	1	1			1,50E-11																																0
Synechococcus phage ACG-2014d (KJ019131)	3	1	1			1,60E-11																																0
Synechococcus phage ACG-2014h (NC_023587)	3	1	1			2,90E-11																																0
Synechococcus phage ACG-2014d (KJ019079)	3	1	1			3,80E-11																																0
Cyanophage S-SSM6b (HQ316603)	3	1	1			5,10E-11																																0
Synechococcus phage S-SSM4 (NC_020875)	3	1	1			5,10E-11																																0
Synechococcus phage S-SCSM1 (MK867354)	3	1	1			5,90E-11																																0
Prochlorococcus phage P-SSM3 (NC_021559)	3	1	1			9,40E-11																																0
Synechococcus phage ACG-2014d (KJ019139)	3	1	1			9,80E-11																																0
Synechococcus phage ACG-2014j (KJ019089)	3	1	1			1,00E-10																																0
Synechococcus phage S-CAM4 (KU686200)	3	1	1			1,00E-10																																0
Synechococcus phage S-CAM4 (KU686202)	3	1	1			1,00E-10																																0
Synechococcus phage ACG-2014j (NC_026926)	3	1	1			1,00E-10																																0
Synechococcus phage S-CAM4 (NC_031900)	3	1	1			1,00E-10																																0
Synechococcus phage ACG-2014a (KJ019039)	3	1	1			1,50E-10																																0
Synechococcus phage ACG-2014a (KJ019026)	3	1	1			1,60E-10																																0
Synechococcus phage ACG-2014a (KJ019030)	3	1	1			1,60E-10																																0
Synechococcus phage ACG-2014a (KJ019033)	3	1	1			1,60E-10																																0
Synechococcus phage ACG-2014a (KJ019055)	3	1	1			1,60E-10																																0
Synechococcus phage ACG-2014a (KJ019065)	3	1	1			1,60E-10																																0
Synechococcus phage ACG-2014a (KJ019067)	3	1	1			1,60E-10																																0
Synechococcus phage ACG-2014a (KJ019068)	3	1	1			1,60E-10																																0
Synechococcus phage ACG-2014a (KJ019076)	3	1	1			1,60E-10																																0
Synechococcus phage ACG-2014a (KJ019081)	3	1	1			1,60E-10																																0
Synechococcus phage ACG-2014a (KJ019084)	3	1	1			1,60E-10																																0
Synechococcus phage ACG-2014a (KJ019087)	3	1	1			1,60E-10																																0
Synechococcus phage ACG-2014a (KJ019088)	3	1	1			1,60E-10																																0
Synechococcus phage ACG-2014a (KJ019114)	3	1	1			1,60E-10																																0
Synechococcus phage ACG-2014a (KJ019116)	3	1	1			1,60E-10																																0
Synechococcus phage ACG-2014a (KJ019122)	3	1	1			1,60E-10																																0
Synechococcus phage ACG-2014a (KJ019135)	3	1	1			1,60E-10																																0
Synechococcus phage ACG-2014a (KJ019137)	3	1	1			1,60E-10																																0
Synechococcus phage ACG-2014a (KJ019138)	3	1	1			1,60E-10																																0
Synechococcus phage ACG-2014a (KJ019153)	3	1	1			1,60E-10																																0
Synechococcus phage ACG-2014a (KJ019157)	3	1	1			1,60E-10																																0
Synechococcus phage ACG-2014a (KJ019158)	3	1	1			1,60E-10																																0
Synechococcus phage ACG-2014a (KJ019163)	3	1	1			1,60E-10																																0
Synechococcus phage S-H34 (MT162467)	3	1	1			1,90E-10																																0
Synechococcus phage ACG-2014a (KJ019038)	3	1	1			1,90E-10																																0
Synechococcus phage ACG-2014c (KJ019128)	3	1	1			2,20E-10																																0
Synechococcus phage S-T4 (NC_048049)	3	1	1			2,40E-10																																0
Synechococcus phage S-MbCM25 (KF156339)	3	1	1			3,30E-10																																0
Vibrio phage Brizo (MK895508)	3	1	1			4,20E-10																																0
Synechococcus phage ACG-2014c (NC_019444)	3	1	1			4,30E-10																																0
Synechococcus phage S-MbCM100 (NC_023584)	3	1	1			4,30E-10																																0
Synechococcus phage ACG-2014c (KJ019027)	3	1	1			4,40E-10																																0
Synechococcus phage ACG-2014c (KJ019063)	3	1	1			4,40E-10																																0
Synechococcus phage ACG-2014c (KJ019064)	3	1	1			4,40E-10																																0
Prochlorococcus phage P-TIM68 (NC_028955)	3	1	1			4,60E-10																																0
Prochlorococcus phage P-RSM4 (NC_015283)	3	1	1			5,60E-10																																0
Cyanophage S-RIM12 (KX349309)	3	1	1			8,10E-10																																0
Cyanophage S-RIM12 (KX349315)	3	1	1			8,10E-10																																0
Cyanophage S-RIM12 (KX349316)	3	1	1			8,10E-10																																0
Cyanophage S-RIM12 (KX349317)	3	1	1			8,10E-10																																0
Cyanophage S-RIM12 (KX349318)	3	1	1			8,10E-10																																0
Cyanophage S-RIM12 (KX349320)	3	1	1			8,10E-10																																0
Prochlorococcus phage Syn33 (NC_015285)	3	1	1			8,10E-10																																0
Cyanophage S-RIM12 (KX349307)	3	1	1			8,20E-10																																0
Cyanophage S-RIM12 (KX349312)	3	1	1			8,20E-10																																0
Cyanophage S-RIM12 (KX349314)	3	1	1			8,20E-10																																0
Cyanophage S-RIM12 (KX349319)	3	1	1			8,20E-10																																0
Prochlorococcus phage P-HM2 (NC_015284)	3	1	1			9,60E-10																																0
Synechococcus phage ACG-2014e (KJ019054)	3	1	1			1,10E-09																																0
Synechococcus phage ACG-2014e (KJ019094)	3	1	1			1,10E-09																																0
Synechococcus phage ACG-2014e (NC_026928)	3	1	1			1,10E-09																																0
Synechococcus phage B3 (MN695334)	3	1	1			2,00E-09																																0
Synechococcus phage B23 (MN695335)	3	1	1			2,00E-09																																0
Synechococcus phage S-N03 (MT162466)	3	1	1			2,10E-09																																0
Cyanophage S-TIM4 (NC_048015)	3	1	1			2,20E-09																																0
Cyanophage P-RSM6 (NC_020855)	3	1	1			2,70E-09																																0
Cyanophage S-RIM44 (KX349291)	3	1	1			2,80E-09																																0
Cyanophage S-RIM44 (KX349293)	3	1	1			2,80E-09																																0
Cyanophage S-RIM44 (KX349296)	3	1	1			2,80E-09																																0
Cyanophage S-RIM44 (NC_047734)	3	1	1			2,80E-09																																0
Vibrio phage JSF10 (NC_042074)	3	1	1			3,00E-09																																0
Vibrio phage JSF12 (NC_047882)	3	1	1			3,00E-09																																0
Cyanophage S-RIM44 (KU594607)	3	1	1			3,30E-09																																0
Cyanophage S-RIM44 (KX349292)	3	1	1			3,30E-09																																0
Cyanophage S-RIM44 (KX349295)	3	1	1			3,30E-09																																0
Cyanophage S-RIM44 (KX349297)	3	1	1			3,30E-09																																0
Prochlorococcus phage Syn1 (NC_015288)	3	1	1			3,30E-09																																0
Cyanophage P-RSM3 (HQ634176)	3	1	1			3,40E-09																																0
Prochlorococcus phage P-SSM4 (NC_006884)	3	1	1			3,40E-09																																0
Synechococcus phage ACG-2014i (NC_027132)	3	1	1			3,60E-09																																0
Pelagibacter phage Mosig EXVC030M (MT647606)	3	1	1			4,70E-09																																0
Synechococcus phage S-B68 (MK016664)	3	1	1			4,80E-09																																0
Cyanophage S-SSM6a (HQ317391)	3	1	1			5,20E-09																																0
Synechococcus phage S-SSM7 (NC_015287)	3	1	1			5,20E-09																																0
Synechococcus phage S-CRM01 (NC_015569)	3	1	1			1,10E-08																																0
Prochlorococcus phage MED4-213 (NC_020845)	3	1	1			3,40E-08																																0
Prochlorococcus phage P-SSM2 (GU071092)	3	1	1			4,60E-08																																0
Prochlorococcus phage P-SSM5 (HQ632825)	3	1	1			4,60E-08																																0
Prochlorococcus phage P-SSM2 (NC_006883)	3	1	1			4,60E-08																																0
Vibrio phage KIT04 (LC487410)	3	1	1			4,60E-08																																0
Vibrio phage VPT02 (MN954399)	3	1	1			9,50E-08																																0
Vibrio phage pVp-1 (NC_019529)	3	1	1			2,70E-07																																0
Synechococcus phage S-CAM9 (KU686205)	3	1	1			3,20E-07																																0
Synechococcus phage S-CAM9 (KU686204)	3	1	1			4,40E-07																																0
Synechococcus phage S-CAM9 (NC_031922)	3	1	1			4,40E-07																																0
Synechococcus phage S-CAM3 (KU686198)	3	1	1			6,40E-07																																0
Synechococcus phage S-CAM3 (NC_031906)	3	1	1			6,40E-07																																0
Synechococcus phage S-CAM3 (KU686197)	3	1	1			6,80E-07																																0
Synechococcus virus S-PRM1 (MH629685)	3	1	1			6,90E-07																																0
Synechococcus phage ACG-2014f (KJ019106)	3	1	1			7,70E-07																																0
Synechococcus phage ACG-2014f (KJ019037)	3	1	1			8,20E-07																																0
Synechococcus phage ACG-2014f (KJ019045)	3	1	1			8,20E-07																																0
Synechococcus phage ACG-2014f (KJ019053)	3	1	1			8,20E-07																																0
Synechococcus phage ACG-2014f (KJ019066)	3	1	1			8,20E-07																																0
Synechococcus phage ACG-2014f (KJ019085)	3	1	1			8,20E-07																																0
Synechococcus phage ACG-2014f (KJ019092)	3	1	1			8,20E-07																																0
Synechococcus phage ACG-2014f (KJ019095)	3	1	1			8,20E-07																																0
Synechococcus phage ACG-2014f (KJ019097)	3	1	1			8,20E-07																																0
Synechococcus phage ACG-2014f (KJ019098)	3	1	1			8,20E-07																																0
Synechococcus phage ACG-2014f (KJ019102)	3	1	1			8,20E-07																																0
Synechococcus phage ACG-2014f (KJ019105)	3	1	1			8,20E-07																																0
Synechococcus phage ACG-2014f (KJ019107)	3	1	1			8,20E-07																																0
Synechococcus phage ACG-2014f (KJ019111)	3	1	1			8,20E-07																																0
Synechococcus phage ACG-2014f (KJ019142)	3	1	1			8,20E-07																																0
Synechococcus phage ACG-2014f (KJ019143)	3	1	1			8,20E-07																																0
Synechococcus phage ACG-2014f (KJ019144)	3	1	1			8,20E-07																																0
Synechococcus phage ACG-2014f (KJ019146)	3	1	1			8,20E-07																																0
Synechococcus phage ACG-2014f (KJ019150)	3	1	1			8,20E-07																																0
Synechococcus phage ACG-2014f (KJ019151)	3	1	1			8,20E-07																																0
Synechococcus phage ACG-2014f (KJ019155)	3	1	1			8,20E-07																																0
Synechococcus phage ACG-2014f (NC_026927)	3	1	1			8,20E-07																																0
Synechococcus phage ACG-2014f (NC_047712)	3	1	1			8,20E-07																																0
Synechococcus phage ACG-2014f (NC_047714)	3	1	1			8,20E-07																																0
Synechococcus phage ACG-2014f (KJ019099)	3	1	1			8,30E-07																																0
Synechococcus phage ACG-2014f (KJ019101)	3	1	1			1,00E-06																																0
Synechococcus phage ACG-2014f (KJ019093)	3	1	1			1,10E-06																																0
Synechococcus phage S-CAM1 (KU686192)	3	1	1			1,20E-06																																0
Synechococcus phage S-CAM1 (KU686193)	3	1	1			1,20E-06																																0
Synechococcus phage S-CAM1 (KU686194)	3	1	1			1,20E-06																																0
Synechococcus phage S-CAM1 (KU686195)	3	1	1			1,20E-06																																0
Synechococcus phage S-CAM1 (KU686196)	3	1	1			1,20E-06																																0
Synechococcus phage S-CAM1 (NC_020837)	3	1	1			1,20E-06																																0
Synechococcus phage ACG-2014f (KJ019145)	3	1	1			1,40E-06																																0
Synechococcus phage ACG-2014f (KJ019141)	3	1	1			1,50E-06																																0
Synechococcus phage ACG-2014f (NC_047713)	3	1	1			1,50E-06																																0
Synechococcus phage ACG-2014f (KJ019100)	3	1	1			1,50E-06																																0
Cyanophage P-TIM40 (NC_028663)	3	1	1			1,90E-06																																0
Pseudanabaena phage PA-SR01 (MT234670)	3	1	1			2,50E-06																																0
Synechococcus phage ACG-2014f (KJ019123)	3	1	1			3,70E-06																																0
Synechococcus phage ACG-2014f (KJ019147)	3	1	1			3,70E-06																																0
Synechococcus phage ACG-2014f (KJ019148)	3	1	1			3,70E-06																																0
Synechococcus phage ACG-2014f (KJ019149)	3	1	1			3,70E-06																																0
Synechococcus phage ACG-2014f (KJ019086)	3	1	1			7,20E-06																																0
Synechococcus phage ACG-2014f (KJ019090)	3	1	1			7,20E-06																																0
Synechococcus phage ACG-2014f (KJ019096)	3	1	1			7,20E-06																																0
Synechococcus phage ACG-2014f (KJ019159)	3	1	1			7,20E-06																																0
Synechococcus phage ACG-2014f (KJ019152)	3	1	1			7,80E-06																																0
Caulobacter phage Seuss (NC_047757)	3	0	0																																			2				9,20E-07				6,90E-47
Shigella virus Shfl1 (NC_015456)	3	0	0																																			1										3,40E-09
Escherichia virus ECH1 (MN164484)	3	0	0																																			1										5,50E-06
Caulobacter phage Sansa (NC_047756)	3	0	0																																			1
Rhizobium phage RHph_Y2_17_1 (MN988548)	3	0	0																																			1								2,90E-37
Rhizobium phage RHph_Y2_11 (MN988547)	3	0	0																																			1								4,30E-37
Rhizobium phage V1VFA-S (MT778838)	3	0	0																																			1								2,70E-30
Rhizobium phage B1VFA (MT770738)	3	0	0																																			1								1,60E-29
Aeromonas phage CF7 (NC_047865)	3	0	0																																			1										4,30E-09
Pectobacterium phage CX5 (MN270887)	3	0	0																																			1										3,50E-08
Pectobacterium phage CX5-1 (MN270888)	3	0	0																																			1										3,50E-08
Escherichia phage Lidtsur (NC_048177)	3	0	0																																			1										5,00E-08
Escherichia phage forsur (MN850617)	3	0	0																																			1										4,00E-07
Escherichia phage glasur (MN850583)	3	0	0																																			1										4,00E-07
Escherichia phage usur (MN850624)	3	0	0																																			1										4,00E-07
Escherichia phage smaasur (MN850625)	3	0	0																																			1										5,30E-07
Escherichia phage altidsur (MN850568)	3	0	0																																			1										7,30E-07
Escherichia phage aldrigsur (MN850592)	3	0	0																																			1										7,30E-07
Escherichia phage J8-65 (NC_025445)	3	0	0																																			1										8,90E-07
Escherichia phage mellemsur (MN850570)	3	0	0																																			1										1,10E-06
Escherichia phage megetsur (MN850608)	3	0	0																																			1										1,10E-06
Salmonella phage 38 (NC_029042)	3	0	0																																			1
Psychrobacillus phage Perkons (MT325768)	3	0	0																																			1
Escherichia phage PD38 (MH669274)	3	0	0																																			1								7,20E-56
Escherichia phage Bp4 (NC_024142)	3	0	0																																			1								7,20E-56
Erwinia phage Ea9-2 (NC_023579)	3	0	0																																			1								4,60E-46
Bacteriophage DSS3_MAL1 (MN602268)	3	0	0																																			1								1,70E-42
Phaeobacter phage MD18 (MT270409)	3	0	0																																			1								6,50E-40
Brevundimonas phage vB_BsubS-Delta (MN862068)	3	0	0																																			1								9,90E-40
Bradyrhizobium phage BDU-MI-1 (KY940711)	3	0	0																																			1								3,00E-35
Mesorhizobium phage Cp1R7A-A1 (MT188704)	3	0	0																																			1								6,10E-33
Microcystis phage Mic1 (MN013189)	3	0	0																																			1								3,90E-30
Escherichia phage K1ind3 (GU196281)	3	0	0																																			1										5,00E-08
Bacillus phage SP-10 (NC_019487)	3	0	0																																			1
Bacillus phage YungSlug (MT416612)	3	0	0																																			1
Vibrio phage VP-1 (MH363700)	3	0	0																																			1
Aeromonas phage AS-gz (NC_042019)	3	0	0																																			1
Aeromonas phage Aes508 (NC_019543)	3	0	0																																			1
Aeromonas phage phiAS4 (NC_014635)	3	0	0																																			1
Aeromonas phage Aes012 (NC_020879)	3	0	0																																			1
Aeromonas phage 50AhydR13PP (MH179476)	3	0	0																																			1
Aeromonas phage 60AhydR15PP (MH179477)	3	0	0																																			1
Stenotrophomonas phage IME13 (NC_029000)	3	0	0																																			1
Aeromonas virus 25 (NC_008208)	3	0	0																																			1
Escherichia phage HY01 (NC_027349)	3	0	0																																			1
Moraxella phage Mcat9 (KR093633)	3	0	0																																			0
Proteus phage vB_PvuS_Pm34 (KY420199)	3	0	0																																			0
Salmonella phage Fels-1 (NC_010391)	3	0	0																																			0
Vibrio phage 1.022.O._10N.286.45.A10 (MG592406)	3	0	0																																			0
Vibrio phage 1.023.O._10N.222.51.B4 (MG592407)	3	0	0																																			0
Vibrio phage 1.104.O._10N.286.49.A12 (MG592476)	3	0	0																																			0
Vibrio phage 1.012.O._10N.261.48.C12 (MG592397)	3	0	0																																			0
Vibrio phage 1.089.O._10N.261.51.F9 (MG592464)	3	0	0																																			0
Vibrio phage 1.098.O._10N.286.51.B9 (MG592471)	3	0	0																																			0
Vibrio phage 1.195.O._10N.286.54.C8 (MG592564)	3	0	0																																			0
Vibrio phage 1.269.O._10N.286.54.A6 (MG592635)	3	0	0																																			0
Vibrio phage 1.118.A._10N.261.49.F6 (MG592492)	3	0	0																																			0
Vibrio phage 1.118.B._10N.261.49.F6 (MG592493)	3	0	0																																			0
Vibrio phage 1.160.O._10N.261.48.B11 (MG592528)	3	0	0																																			0
Vibrio phage 1.237.A._10N.261.52.C5 (MG592601)	3	0	0																																			0
Vibrio phage 1.237.B._10N.261.52.C5 (MG592602)	3	0	0																																			0
Vibrio phage 1.283.A._10N.286.55.A1 (MG592651)	3	0	0																																			0
Vibrio phage 1.283.B._10N.286.55.A1 (MG592652)	3	0	0																																			0
Vibrio phage 1.283.C._10N.286.55.A1 (MG592653)	3	0	0																																			0
Proteus phage VB_PmiS-Isfahan (NC_041925)	3	0	0																																			0
Vibrio phage 1.198.A._10N.286.54.F4 (MG592567)	3	0	0																																			0
Vibrio phage 1.198.B._10N.286.54.F4 (MG592568)	3	0	0																																			0
Vibrio virus vB_VspP_SBP1 (MK301608)	3	0	0																																			0
Burkholderia virus phi1026b (NC_005284)	3	0	0																																			0
Burkholderia virus phiE125 (NC_003309)	3	0	0																																			0
Burkholderia phage KS9 (NC_013055)	3	0	0																																			0
Vibrio phage VpaJT_1 (MH925092)	3	0	0																																			0
Enterobacteria phage T3 (NC_003298)	3	0	0																																			0
Enterobacteria phage T7M (NC_047867)	3	0	0																																			0
Yersinia phage phiYeO3-12 (NC_001271)	3	0	0																																			0
Escherichia phage T7 (MG833025)	3	0	0																																			0
Vibrio phage vB_VhaM_VH-8 (MN497415)	3	0	0																																			0
Pseudomonas phage PA1C (MK599315)	3	0	0																																			0
Ralstonia phage DU_RP_I (NC_047888)	3	0	0																																			0
Citrobacter phage CR44b (NC_023576)	3	0	0																																			0
Citrobacter phage SH5 (KU687351)	3	0	0																																			0
Citrobacter phage SH4 (NC_031018)	3	0	0																																			0
Escherichia phage CLB_P1 (KC109329)	3	0	0																																			0
Escherichia phage K1F (NC_007636)	3	0	0																																			0
Citrobacter phage SH3 (NC_031123)	3	0	0																																			0
Erwinia phage vB_EamP-L1 (NC_019510)	3	0	0																																			0
Yersinia phage Berlin (NC_008694)	3	0	0																																			0
Yersinia phage Yep-phi (NC_023715)	3	0	0																																			0
Escherichia phage SRT7 (NC_048002)	3	0	0																																			0
Yersinia phage Yepe2 (NC_011038)	3	0	0																																			0
Escherichia phage T7 (AY264778)	3	0	0																																			0
Escherichia phage T7 (AY264774)	3	0	0																																			0
Escherichia phage T7 (NC_001604)	3	0	0																																			0
Escherichia phage T7 (AY264777)	3	0	0																																			0
Citrobacter phage CR8 (NC_023548)	3	0	0																																			0
Escherichia phage T7 (AY264776)	3	0	0																																			0
Escherichia phage T7 (AY264775)	3	0	0																																			0
Escherichia phage 13a (NC_011045)	3	0	0																																			0
Salmonella phage phiSG-JL2 (NC_010807)	3	0	0																																			0
Citrobacter phage SH1 (NC_031066)	3	0	0																																			0
Citrobacter phage SH2 (NC_031092)	3	0	0																																			0
Klebsiella phage K11 (NC_011043)	3	0	0																																			0
Escherichia phage Ebrios (NC_047942)	3	0	0																																			0
Pectobacterium phage Jarilo (NC_047963)	3	0	0																																			0
Escherichia phage LM33_P1 (NC_031937)	3	0	0																																			0
Ralstonia phage phiITL-1 (NC_047751)	3	0	0																																			0
Salmonella phage vB_SalM-LPST153 (MK907285)	3	0	0																																			0
Klebsiella phage Henu1 (NC_048138)	3	0	0																																			0
Salmonella phage vB_Sen_I1 (MT233524)	3	0	0																																			0
Salmonella phage SE3 (MK770410)	3	0	0																																			0
Salmonella phage 8sent65 (MT653145)	3	0	0																																			0
Salmonella phage vB_SenS_PHB06 (MH102285)	3	0	0																																			0
Escherichia phage Mangalitsa (NC_048799)	3	0	0																																			0
Erwinia phage vB_EamM-Y2 (NC_019504)	3	0	0																																			0
Cronobacter phage vB_CsaP_GAP52 (NC_019402)	3	0	0																																			0
Cronobacter phage A24 (MW343794)	3	0	0																																			0
Erwinia phage pEa_SNUABM_27 (MW349138)	3	0	0																																			0
Pantoea phage vB_PagM_SSEM1 (NC_048875)	3	0	0																																			0
Escherichia phage vB_EcoM_Bp10 (MN122072)	3	0	0																																			0
Vibrio phage NF (MN812722)	3	0	0																																			0
Rhizobium phage RHEph10 (NC_034248)	3	0	0																																			0
Rhizobium phage RHph_N1_10 (MN988505)	3	0	0																																			0
Roseobacter phage RDJL Phi 1 (NC_015466)	3	0	0																																			0
Roseobacter phage RDJL Phi 2 (NC_041958)	3	0	0																																			0
Pectobacterium phage Wc4 (MN270891)	3	0	0																																			0
Pectobacterium phage Wc4-1 (MN270892)	3	0	0																																			0
Pectobacterium phage Arno162 (MK290737)	3	0	0																																			0
Pectobacterium phage Arno18 (MK290738)	3	0	0																																			0
Klebsiella phage ST13-OXA48phi12.3 (MK422451)	3	0	0																																			0
Pseudomonas phage phiK7B1 (MT354569)	3	0	0																																			0
Pseudomonas phage nickie (NC_042091)	3	0	0																																			0
Pseudomonas phage Noxifer (NC_041994)	3	0	0																																			0
Pseudomonas phage vB_PaeM_PS119XW (MN103543)	3	0	0																																			0
Pseudomonas phage PhiPA3 (NC_028999)	3	0	0																																			0
Pseudomonas phage KTN4 (KU521356)	3	0	0																																			0
Pseudomonas phage fnug (MT133560)	3	0	0																																			0
Pseudomonas virus phiKZ (NC_004629)	3	0	0																																			0
Pseudomonas phage SL2 (NC_042081)	3	0	0																																			0
Pseudomonas phage PA02 (AP019418)	3	0	0																																			0
Pseudomonas phage PA7 (NC_042060)	3	0	0																																			0
Pseudomonas phage Psa21 (MK552327)	3	0	0																																			0
Burkholderia phage FLC6 (LC592711)	3	0	0																																			0
Ralstonia phage RSL2 (NC_028950)	3	0	0																																			0
Ralstonia phage RSF1 (NC_028899)	3	0	0																																			0
Vibrio phage vB_pir03 (MT811961)	3	0	0																																			0
Tenacibaculum phage pT24 (NC_049383)	3	0	0																																			0
Ralstonia phage RsoP1EGY (NC_047946)	3	0	0																																			0
Mesorhizobium phage vB_MloP_Lo5R7ANS (NC_025431)	3	0	0																																			0
Ralstonia phage P-PSG-11 (MN270889)	3	0	0																																			0
Ralstonia phage P-PSG-11-1 (MN270890)	3	0	0																																			0
Rhizobium phage RHph_I20 (MN988539)	3	0	0																																			0
Vibrio phage JSF18 (KY883650)	3	0	0																																			0
Vibrio phage JSF25 (MF574151)	3	0	0																																			0
Vibrio phage ICP3_2009_A (HQ641342)	3	0	0																																			0
Vibrio phage JSF31 (KY883645)	3	0	0																																			0
Vibrio phage JSF32 (KY883646)	3	0	0																																			0
Vibrio phage JSF35 (KY883648)	3	0	0																																			0
Vibrio phage JSF36 (KY883649)	3	0	0																																			0
Vibrio phage JSF20 (KY883651)	3	0	0																																			0
Vibrio phage JSF24 (KY883652)	3	0	0																																			0
Vibrio phage JSF34 (KY883653)	3	0	0																																			0
Bordetella phage vB_BbrP_BB8 (MK984681)	3	0	0																																			0
Agrobacterium phage Atu_ph03 (NC_047846)	3	0	0																																			0
Vibrio phage JSF11 (KY883641)	3	0	0																																			0
Vibrio phage ICP3 (NC_015159)	3	0	0																																			0
Vibrio phage Rostov-1 (MG957431)	3	0	0																																			0
Vibrio phage N4 (NC_013651)	3	0	0																																			0
Vibrio phage ICP3_2007_A (HQ641344)	3	0	0																																			0
Agrobacterium phage Atu_ph02 (NC_047845)	3	0	0																																			0
Vibrio phage JSF30 (KY883644)	3	0	0																																			0
Vibrio phage ICP3_2008_A (HQ641343)	3	0	0																																			0
Vibrio phage VP4 (NC_007149)	3	0	0																																			0
Vibrio phage VP3 (JQ780163)	3	0	0																																			0
Pseudomonas phage 17A (NC_048201)	3	0	0																																			0
Teseptimavirus S2B (MN857473)	3	0	0																																			0
Pseudomonas phage CHF19 (MN729597)	3	0	0																																			0
Pseudomonas phage CHF17 (MN729600)	3	0	0																																			0
Ralstonia phage RSB2 (NC_023736)	3	0	0																																			0
Pseudomonas phage MR2 (MT104466)	3	0	0																																			0
Rhizobium phage Pasto (MT708545)	3	0	0																																			0
Aeromonas phage T7-Ah (MT740748)	3	0	0																																			0
Pseudomonad phage gh-1 (NC_004665)	3	0	0																																			0
Pseudomonas phage Waldo5 (MT711889)	3	0	0																																			0
Pseudomonas phage CHF7 (MN729596)	3	0	0																																			0
Pseudomonas phage CHF1 (MN729595)	3	0	0																																			0
Pseudomonas phage CHF33 (MN729599)	3	0	0																																			0
Pseudomonas phage phiPSA2 (NC_024362)	3	0	0																																			0
Pseudomonas virus WRT (NC_047826)	3	0	0																																			0
Pseudomonas phage CHF21 (MN729598)	3	0	0																																			0
Pseudomonas phage phiPsa17 (NC_047747)	3	0	0																																			0
Pseudomonas virus KNP (NC_047827)	3	0	0																																			0
Pseudomonas virus Pf1 ERZ-2017 (NC_047874)	3	0	0																																			0
Pseudomonas phage MR1 (MT104465)	3	0	0																																			0
Pseudomonas phage PPPL-1 (NC_028661)	3	0	0																																			0
Pelagibacter phage HTVC119P (MH598806)	3	0	0																																			0
Pseudomonas phage PlaquesPlease (MT711890)	3	0	0																																			0
Pseudomonas phage Henninger (NC_047922)	3	0	0																																			0
Pseudomonas phage shl2 (NC_048200)	3	0	0																																			0
Ralstonia phage RPSC1 (NC_047982)	3	0	0																																			0
Delftia phage IME-DE1 (NC_028702)	3	0	0																																			0
Rhizobium phage RHph_I38 (MN988529)	3	0	0																																			0
Pasteurella phage vB_PmuP_Pa7 (MT902335)	3	0	0																																			0
Pasteurella phage vB_PmuP_PHB02 (NC_047831)	3	0	0																																			0
Escherichia phage Ro45lw (NC_048136)	3	0	0																																			0
Rhizobium phage RHph_TM33 (MN988492)	3	0	0																																			0
Rhizobium phage RHph_TM38 (MN988493)	3	0	0																																			0
Rhizobium phage RHEph03 (JX483875)	3	0	0																																			0
Rhizobium phage RHEph02 (NC_047868)	3	0	0																																			0
Pasteurella phage PHB01 (NC_047832)	3	0	0																																			0
Rhizobium phage RHEph08 (NC_047869)	3	0	0																																			0
Rhizobium phage RHEph09 (NC_047870)	3	0	0																																			0
Pelagibacter phage HTVC200P (MH598801)	3	0	0																																			0
Providencia phage PSTCR2 (MW057854)	3	0	0																																			0
Escherichia phage vB_EcoP-Ro103C3lw (MN067430)	3	0	0																																			0
Escherichia phage Pisces (MK903277)	3	0	0																																			0
Escherichia phage IMM-002 (NC_048071)	3	0	0																																			0
Pseudomonas phage vB_PsyP_3MF5 (MT597419)	3	0	0																																			0
Enterobacter phage EcpYZU01 (NC_048135)	3	0	0																																			0
Cronobacter phage GW1 (NC_048161)	3	0	0																																			0
Rhizobium phage RHph_N37 (MN988528)	3	0	0																																			0
Pelagibacter phage Eyrgjafa EXVC018P (MT375523)	3	0	0																																			0
Pelagibacter phage Gjalp EXVC020P (MT375524)	3	0	0																																			0
Escherichia phage GA2A (NC_031943)	3	0	0																																			0
Providencia phage PSTRCR_128 (MW358931)	3	0	0																																			0
Cronobacter phage Dev2 (NC_023558)	3	0	0																																			0
Escherichia phage vB_EcoP_F (NC_047808)	3	0	0																																			0
Morganella phage MmP1 (NC_011085)	3	0	0																																			0
Escherichia phage ZG49 (NC_047777)	3	0	0																																			0
Pectobacterium phage DU_PP_II (NC_047886)	3	0	0																																			0
Pseudomonas phage PPpW-4 (NC_023005)	3	0	0																																			0
Escherichia phage vB_Eco_D226 (MN080711)	3	0	0																																			0
Escherichia phage vB_EcoP_SP7 (MT682707)	3	0	0																																			0
Pseudomonas phage PspYZU08 (NC_047981)	3	0	0																																			0
Escherichia phage Mt1B1_P3 (MT496969)	3	0	0																																			0
Hafnia phage vB_HpaA_yong1 (MK610268)	3	0	0																																			0
Escherichia phage vB_EcoP_PR_Kaz2018 (MN510331)	3	0	0																																			0
Escherichia phage RDN8.1 (MN414250)	3	0	0																																			0
Escherichia phage P483 (NC_028822)	3	0	0																																			0
Escherichia phage ST31 (NC_047829)	3	0	0																																			0
Escherichia virus LS3 (MN518893)	3	0	0																																			0
Pelagibacter phage HTVC025P (MH598799)	3	0	0																																			0
Escherichia virus Vec13 (NC_048023)	3	0	0																																			0
Yersinia phage vB_YenP_AP10 (NC_028655)	3	0	0																																			0
Rhizobium phage Palo (MT708544)	3	0	0																																			0
Pantoea phage vB_PagP-SK1 (MN450150)	3	0	0																																			0
Escherichia phage JSS1 (KX689784)	3	0	0																																			0
Escherichia phage PE3-1 (NC_024379)	3	0	0																																			0
Pectobacterium phage PP74 (NC_047789)	3	0	0																																			0
Enterococcus phage EFA-1 (MT350292)	3	0	0																																			0
Escherichia phage Peacock (MK903279)	3	0	0																																			0
Escherichia phage DY1 (MT808983)	3	0	0																																			0
Escherichia phage vB_EcoP-U8 (MT862763)	3	0	0																																			0
Escherichia phage K1F (NC_007456)	3	0	0																																			0
Escherichia phage YZ1 (NC_047927)	3	0	0																																			0
Escherichia phage EcoDS1 (NC_011042)	3	0	0																																			0
Kluyvera phage Kvp1 (NC_011534)	3	0	0																																			0
Escherichia phage vB_EcoP_S523 (NC_047984)	3	0	0																																			0
Pseudomonas phage UNO-SLW2 (KX449361)	3	0	0																																			0
Pseudomonas phage UNO-SLW3 (KX449362)	3	0	0																																			0
Pseudomonas phage UNO-SLW4 (KX449363)	3	0	0																																			0
Pseudomonas phage UNO-SLW1 (NC_047873)	3	0	0																																			0
Shigella phage VB_Ship_A7 (NC_048180)	3	0	0																																			0
Pseudomonas phage BIM BV-46 (MT094431)	3	0	0																																			0
Pseudomonas phage Pf-10 (NC_027292)	3	0	0																																			0
Escherichia phage P694 (NC_028863)	3	0	0																																			0
Erwinia phage FE44 (NC_022744)	3	0	0																																			0
Salmonella phage BSP161 (NC_048105)	3	0	0																																			0
Enterobacter phage PZJ0206 (MT625440)	3	0	0																																			0
Escherichia phage BA14 (NC_011040)	3	0	0																																			0
Yersinia phage vB_YpP_T3 (MT374859)	3	0	0																																			0
Salmonella phage BP12A (NC_031258)	3	0	0																																			0
Enterobacter phage phiEap-1 (NC_028772)	3	0	0																																			0
Escherichia phage 285P (NC_015249)	3	0	0																																			0
Escherichia phage vB_EcoP_PHB20 (MN481366)	3	0	0																																			0
Enterobacteria phage vB_EcoP_IME390 (NC_048082)	3	0	0																																			0
Klebsiella phage vB_KpnP_IL33 (NC_047782)	3	0	0																																			0
Salmonella phage LPST144 (MN252582)	3	0	0																																			0
Escherichia phage PhiV-1 (MT542512)	3	0	0																																			0
Pectobacterium phage PPWS4 (NC_047819)	3	0	0																																			0
Morganella phage vB_MmoP_MP2 (NC_031115)	3	0	0																																			0
Klebsiella phage vB_KpnP_NahiliMali (MN013085)	3	0	0																																			0
Yersinia phage YpP-G (JQ965702)	3	0	0																																			0
Pseudomonas phage Phi-S1 (NC_021062)	3	0	0																																			0
Erwinia phage pEp_SNUABM_12 (MT822288)	3	0	0																																			0
Escherichia phage CICC 80001 (NC_027387)	3	0	0																																			0
Dickeya phage Ninurta (NC_047964)	3	0	0																																			0
Escherichia phage T7 (GU071091)	3	0	0																																			0
Escherichia phage T7 (LR745706)	3	0	0																																			0
Escherichia phage T7 (LR745707)	3	0	0																																			0
Escherichia phage T7 (LR745708)	3	0	0																																			0
Escherichia phage T7 (LR745709)	3	0	0																																			0
Escherichia phage T7 (LR745710)	3	0	0																																			0
Escherichia phage P1723 (MT465573)	3	0	0																																			0
Klebsiella phage vB_KpnP_Sibilus (MN013082)	3	0	0																																			0
Dickeya phage vB_DsoP_JA10 (NC_048052)	3	0	0																																			0
Klebsiella phage vB_KpnP_KpV767 (NC_047772)	3	0	0																																			0
Yersinia phage fPS-59 (NC_047935)	3	0	0																																			0
Pseudomonas phage 71PfluR64PP (MH179475)	3	0	0																																			0
Pseudomonas phage 22PfluR64PP (NC_047965)	3	0	0																																			0
Yersinia phage fPS-54-ocr (NC_047937)	3	0	0																																			0
Pelagibacter phage HTVC011P (NC_020482)	3	0	0																																			0
Enterococcus phage EFA-2 (MT350293)	3	0	0																																			0
Yersinia phage fPS-89 (LT961841)	3	0	0																																			0
Yersinia phage fPS-85 (LT962380)	3	0	0																																			0
Yersinia phage fPS-53 (NC_047936)	3	0	0																																			0
Klebsiella phage vB_KpnP_PRA33 (NC_047780)	3	0	0																																			0
Pseudomonas phage 67PfluR64PP (MH179478)	3	0	0																																			0
Klebsiella phage 066053 (MW042807)	3	0	0																																			0
Yersinia phage fPS-7 (LT961840)	3	0	0																																			0
Yersinia phage fPS-10 (LT962907)	3	0	0																																			0
Yersinia phage fPS-9 (NC_047934)	3	0	0																																			0
Yersinia phage fPS-19 (LT961838)	3	0	0																																			0
Yersinia phage fPS-86 (LT961842)	3	0	0																																			0
Yersinia phage fPS-21 (LT961844)	3	0	0																																			0
Yersinia phage fPS16 (LT962906)	3	0	0																																			0
Yersinia phage fPS-52 (LT961837)	3	0	0																																			0
Yersinia phage fPS-50 (LT961843)	3	0	0																																			0
Klebsiella phage KMI1 (MN052874)	3	0	0																																			0
Escherichia phage NC-A (NC_048163)	3	0	0																																			0
Yersinia phage PYPS50 (NC_048108)	3	0	0																																			0
Vibrio phage phi-A318 (NC_025822)	3	0	0																																			0
Yersinia phage fPS-26 (LT961836)	3	0	0																																			0
Pseudomonas phage phiIBB-PF7A (NC_015264)	3	0	0																																			0
Escherichia phage 64795_ec1 (NC_031114)	3	0	0																																			0
Klebsiella phage vB_KpnP_KpV289 (NC_028977)	3	0	0																																			0
Yersinia phage fPS-64 (LT961846)	3	0	0																																			0
Pectobacterium phage MA1A (MN308080)	3	0	0																																			0
Pectobacterium phage MA6 (MN327636)	3	0	0																																			0
Escherichia virus LS2 (MN518894)	3	0	0																																			0
Pseudomonas phage PFP1 (NC_047997)	3	0	0																																			0
Salmonella phage 3A_8767 (NC_048004)	3	0	0																																			0
Klebsiella phage P510 (MT966872)	3	0	0																																			0
Klebsiella phage vB_KpnP_KpV766 (NC_047773)	3	0	0																																			0
Escherichia phage HZ2R8 (NC_047923)	3	0	0																																			0
Yersinia phage YpP-R (JQ965701)	3	0	0																																			0
Yersinia phage Y (JQ957925)	3	0	0																																			0
Yersinia phage R (JX000007)	3	0	0																																			0
Yersinia phage phiA1122 (NC_004777)	3	0	0																																			0
Klebsiella phage KMI2 (MN101216)	3	0	0																																			0
Erwinia phage pEp_SNUABM_09 (MN184885)	3	0	0																																			0
Erwinia phage pEp_SNUABM_03 (MT822284)	3	0	0																																			0
Erwinia phage pEp_SNUABM_04 (MT822285)	3	0	0																																			0
Erwinia phage pEp_SNUABM_10 (MT822286)	3	0	0																																			0
Erwinia phage pEp_SNUABM_11 (MT822287)	3	0	0																																			0
Escherichia phage vB_EcoP_PHB19 (MN481365)	3	0	0																																			0
Klebsiella phage SH-Kp 152410 (NC_047908)	3	0	0																																			0
Pectobacterium phage PP81 (NC_047797)	3	0	0																																			0
Pectobacterium phage PP47 (NC_047801)	3	0	0																																			0
Klebsiella phage vB_KpnP_IME335 (MN176574)	3	0	0																																			0
Yersinia phage YpsP-G (NC_047940)	3	0	0																																			0
Klebsiella phage KMI4 (MN101218)	3	0	0																																			0
Serratia phage Pila (MN098329)	3	0	0																																			0
Escherichia phage N30 (NC_048078)	3	0	0																																			0
Escherichia phage C5 (NC_048079)	3	0	0																																			0
Escherichia phage HZP2 (NC_048164)	3	0	0																																			0
Klebsiella phage 2044-307w (NC_047842)	3	0	0																																			0
Salmonella phage C2 (MN026740)	3	0	0																																			0
Klebsiella phage K5 (NC_028800)	3	0	0																																			0
Escherichia phage EG1 (NC_047895)	3	0	0																																			0
Escherichia phage JB01 (MW074885)	3	0	0																																			0
Klebsiella phage KP32 (NC_013647)	3	0	0																																			0
Pseudomonas phage phi15 (NC_015208)	3	0	0																																			0
Citrobacter phage NS1 (MN715150)	3	0	0																																			0
Serratia phage SALSA (MT419366)	3	0	0																																			0
Escherichia phage K30 (NC_015719)	3	0	0																																			0
Dickeya phage Dagda_B1 (MH807810)	3	0	0																																			0
Dickeya phage Dagda (NC_047961)	3	0	0																																			0
Pseudomonas phage Stalingrad (MT711887)	3	0	0																																			0
Klebsiella phage IME304 (MK795385)	3	0	0																																			0
Klebsiella phage vB_KpnP_IME205 (NC_047761)	3	0	0																																			0
Klebsiella phage 066022 (MW042790)	3	0	0																																			0
Klebsiella phage 066025 (MW042793)	3	0	0																																			0
Klebsiella phage 066026 (MW042794)	3	0	0																																			0
Klebsiella phage 066031 (MW042797)	3	0	0																																			0
Klebsiella phage 066036 (MW042799)	3	0	0																																			0
Klebsiella phage 066038 (MW042801)	3	0	0																																			0
Klebsiella phage 066045 (MW042805)	3	0	0																																			0
Klebsiella phage 066121 (MW042811)	3	0	0																																			0
Klebsiella phage 066134 (MW042812)	3	0	0																																			0
Klebsiella phage 066042 (MW042804)	3	0	0																																			0
Enterobacteria phage T3 (NC_047864)	3	0	0																																			0
Klebsiella phage kpssk3 (NC_048114)	3	0	0																																			0
Klebsiella phage 31 (MN149904)	3	0	0																																			0
Leclercia phage 10164RH (MF285617)	3	0	0																																			0
Leclercia phage 10164-302 (NC_047843)	3	0	0																																			0
Yersinia phage phiYe-F10 (NC_047755)	3	0	0																																			0
Klebsiella phage Kund-ULIP47 (MK380015)	3	0	0																																			0
Klebsiella phage SH-Kp 152234 (NC_047980)	3	0	0																																			0
Klebsiella phage SH-KP152226 (MK903728)	3	0	0																																			0
Klebsiella virus KP32 (NC_047971)	3	0	0																																			0
Klebsiella phage AmPh_EK52 (MN434093)	3	0	0																																			0
Klebsiella phage NL_ZS_2 (MT813141)	3	0	0																																			0
Dickeya phage Mysterion (NC_048060)	3	0	0																																			0
Klebsiella phage Kund-ULIP54 (MK380016)	3	0	0																																			0
Citrobacter phage phiCFP-1 (NC_028880)	3	0	0																																			0
Yersinia phage vB_YenP_AP5 (NC_025451)	3	0	0																																			0
Dickeya phage Luksen (NC_048059)	3	0	0																																			0
Klebsiella phage NL_ZS_1 (MT813140)	3	0	0																																			0
Klebsiella phage Pharr (NC_048175)	3	0	0																																			0
Klebsiella phage vB_KpnP_BIS33 (NC_047781)	3	0	0																																			0
Escherichia phage ECA2 (NC_047766)	3	0	0																																			0
Escherichia phage LL2 (NC_048063)	3	0	0																																			0
Serratia phage SM9-3Y (NC_047774)	3	0	0																																			0
Enterobacter phage E-4 (KP791807)	3	0	0																																			0
Enterobacter phage E-2 (NC_029102)	3	0	0																																			0
Klebsiella phage Patroon (MK608335)	3	0	0																																			0
Klebsiella virus KP32 (NC_047969)	3	0	0																																			0
Klebsiella phage NL_ZS_3 (MT813142)	3	0	0																																			0
Klebsiella phage vB_KpnP_Emp27 (MN013074)	3	0	0																																			0
Klebsiella phage Kp_Pokalde_002 (MT425185)	3	0	0																																			0
Serratia phage 2050H2 (NC_047844)	3	0	0																																			0
Klebsiella phage vB_KpnP_FZ12 (MK521905)	3	0	0																																			0
Klebsiella phage vB_KpnP_IME321 (NC_048014)	3	0	0																																			0
Klebsiella phage 066023 (MW042791)	3	0	0																																			0
Klebsiella phage 066027 (MW042795)	3	0	0																																			0
Klebsiella phage 066028 (MW042796)	3	0	0																																			0
Klebsiella phage 066032 (MW042798)	3	0	0																																			0
Klebsiella phage 066058 (MW042809)	3	0	0																																			0
Klebsiella phage 066059 (MW042810)	3	0	0																																			0
Klebsiella phage 066041 (MW042803)	3	0	0																																			0
Klebsiella phage 117 (MN149903)	3	0	0																																			0
Aeromonas phage PZL-Ah1 (MT681669)	3	0	0																																			0
Klebsiella phage KN1-1 (NC_048129)	3	0	0																																			0
Klebsiella phage 066046 (MW042806)	3	0	0																																			0
Klebsiella phage KN4-1 (NC_048130)	3	0	0																																			0
Klebsiella phage 066019 (MW042789)	3	0	0																																			0
Klebsiella phage P509 (MT542697)	3	0	0																																			0
Klebsiella phage K5-2 (NC_047798)	3	0	0																																			0
Dickeya phage Katbat (NC_048057)	3	0	0																																			0
Klebsiella phage 066013 (MW042787)	3	0	0																																			0
Klebsiella phage 066015 (MW042788)	3	0	0																																			0
Klebsiella phage P560 (MT966873)	3	0	0																																			0
Klebsiella virus KP32 (NC_047970)	3	0	0																																			0
Klebsiella phage 066056 (MW042808)	3	0	0																																			0
Klebsiella phage vB_KpnP_KpV763 (NC_047771)	3	0	0																																			0
Klebsiella virus KP32 (NC_047968)	3	0	0																																			0
Klebsiella phage K5-4 (NC_047799)	3	0	0																																			0
Klebsiella phage vB_Kp168 (MN585130)	3	0	0																																			0
Klebsiella phage vB_Kp1 (NC_028688)	3	0	0																																			0
Klebsiella phage 066024 (MW042792)	3	0	0																																			0
Klebsiella phage KN3-1 (NC_048131)	3	0	0																																			0
Stenotrophomonas phage IME15 (NC_019416)	3	0	0																																			0
Pectobacterium phage Q19 (MK290739)	3	0	0																																			0
Escherichia virus ECG4 (MN218775)	3	0	0																																			0
Prochlorococcus virus PSSP7 (NC_006882)	3	0	0																																			0
Synechococcus T7-like phage S-TIP37 (NC_048026)	3	0	0																																			0
Providencia phage PSTRCR_120 (MW358928)	3	0	0																																			0
Synechococcus phage S-SBP1 (MT424636)	3	0	0																																			0
Synechococcus virus Syn5 (NC_009531)	3	0	0																																			0
Synechococcus phage S-B28 (NC_048171)	3	0	0																																			0
Cyanophage SS120-1 (NC_020872)	3	0	0																																			0
Synechococcus virus P60 (NC_003390)	3	0	0																																			0
Synechococcus phage S-CBP2 (NC_025455)	3	0	0																																			0
Yersinia phage YpP-Y (NC_047939)	3	0	0																																			0
Roseobacter phage CRP-7 (MK613349)	3	0	0																																			0
Enterococcus phage EF1 (MF001358)	3	0	0																																			0
Enterococcus phage EF5 (MF001361)	3	0	0																																			0
Vibrio phage BONAISHI (MH595538)	3	0	0																																			0
Aeromonas phage AhSzw-1 (NC_047950)	3	0	0																																			0
Aeromonas phage AhSzq-1 (NC_047949)	3	0	0																																			0
Vibrio phage 1.025.O._10N.222.46.B6 (MG592409)	3	0	0																																			0
Vibrio phage 1.150.O._10N.222.46.A6 (MG592519)	3	0	0																																			0
Vibrio phage 1.152.O._10N.222.46.E1 (MG592521)	3	0	0																																			0
Vibrio phage 2.130.O._10N.222.46.C2 (MG592668)	3	0	0																																			0
Vibrio phage 1.026.O._10N.222.49.C7 (NC_049430)	3	0	0																																			0
Yersinia phage fPS-2 (LR215722)	3	0	0																																			0
Shigella phage SHFML-26 (NC_031011)	3	0	0																																			0
Bacillus phage PBC2 (KT070867)	3	0	0																																			0
Pseudomonas phage tf (NC_017971)	3	0	0																																			0
Pseudomonas phage NV1 (NC_042107)	3	0	0																																			0
Pseudoalteromonas phage HP1 (NC_048630)	3	0	0																																			0
Lentibacter virus vB_LenP_ICBM2 (NC_048671)	3	0	0																																			0
Lactococcus phage AM4 (NC_049856)	3	0	0																																			0
Lactococcus phage AM5 (KY554772)	3	0	0																																			0
Bacillus phage BSP10 (MF422185)	3	0	0																																			0
Bacillus phage BSTP3 (MW354667)	3	0	0																																			0
Vibrio phage Quinn (MT460516)	3	0	0																																			0
Vibrio phage Athena (MT460517)	3	0	0																																			0
Vibrio phage Chazly21 (MN966731)	3	0	0																																			0
Vibrio phage Direpillow8 (MT460518)	3	0	0																																			0
Vibrio phage Bennett (MN958086)	3	0	0																																			0
Vibrio phage Dax (MT459144)	3	0	0																																			0
Vibrio phage BBMuffin (MT448616)	3	0	0																																			0
Synechococcus phage ACG-2014b (KJ019109)	3	0	0																																			0
Vibrio phage 1.097.O._10N.286.49.B3 (NC_049431)	3	0	0																																			0
Escherichia phage vB_EcoM_G2540-3 (MK327944)	3	0	0																																			0
Escherichia phage vB_EcoM_Ozark (MT682713)	3	0	0																																			0
Yersinia phage phiD1 (NC_027353)	3	0	0																																			0
Escherichia phage vB_EcoM_G10400 (MK327937)	3	0	0																																			0
Escherichia phage vB_EcoM_WFL6982 (MK373774)	3	0	0																																			0
Escherichia phage vB_EcoM_WFK (MK373775)	3	0	0																																			0
Escherichia phage vB_EcoM_G2285 (MK327933)	3	0	0																																			0
Escherichia phage vB_EcoM_G2469 (MK327934)	3	0	0																																			0
Shigella phage JK45 (MK962757)	3	0	0																																			0
Yersinia phage fPS-90 (LR215723)	3	0	0																																			0
Escherichia phage F2 (MN864145)	3	0	0																																			0
Yersinia phage vB_YenM_TG1 (NC_028820)	3	0	0																																			0
Yersinia phage PYPS2T (MH809535)	3	0	0																																			0
Campylobacter phage F379 (MT932329)	3	0	0																																			0
Campylobacter phage CP20 (MK408758)	3	0	0																																			0
Campylobacter phage CP39 (MH107028)	3	0	0																																			0
Campylobacter phage PC5 (KX229736)	3	0	0																																			0
Campylobacter phage F370 (MT863727)	3	0	0																																			0
Campylobacter phage F371 (MT863728)	3	0	0																																			0
Campylobacter phage F372 (MT863729)	3	0	0																																			0
Campylobacter phage CP8 (KF148616)	3	0	0																																			0
Campylobacter virus CPX (NC_016562)	3	0	0																																			0
Campylobacter phage PC14 (NC_031909)	3	0	0																																			0
Campylobacter phage F357 (MT863720)	3	0	0																																			0
Campylobacter phage F358 (MT863721)	3	0	0																																			0
Campylobacter phage F360 (MT863722)	3	0	0																																			0
Campylobacter phage F365 (MT863724)	3	0	0																																			0
Campylobacter phage F367 (MT863725)	3	0	0																																			0
Campylobacter phage F368 (MT863726)	3	0	0																																			0
Campylobacter phage F361 (MT863723)	3	0	0																																			0
Campylobacter phage F356 (MT863719)	3	0	0																																			0
Campylobacter phage F355 (MT863718)	3	0	0																																			0
Campylobacter phage F348 (MT863716)	3	0	0																																			0
Campylobacter phage F352 (MT863717)	3	0	0																																			0
Campylobacter phage F374 (MT863730)	3	0	0																																			0
Campylobacter phage F375 (MT863731)	3	0	0																																			0
Campylobacter virus CP81 (NC_042112)	3	0	0																																			0
Campylobacter phage F336 (MT863715)	3	0	0																																			0
Campylobacter phage vB_CjeM_Los1 (NC_041896)	3	0	0																																			0
Campylobacter phage F207 (MT863714)	3	0	0																																			0
Campylobacter phage CP30A (NC_018861)	3	0	0																																			0
Bacillus phage vB_BceM_Bc431v3 (NC_020873)	3	0	0																																			0
Bacteroides phage SJC03 (MT074146)	3	0	0																																			0
Podovirus Lau218 (KJ183193)	3	0	0																																			0
Vibrio phage 1.262.O._10N.286.51.A9 (MG592626)	3	0	0																																			0
Escherichia phage vB_EcoP_K (NC_047809)	3	0	0																																			0
Pseudomonas phage SCYZ1 (MH518298)	3	0	0																																			0
Vibrio phage 1.264.O._10N.286.51.F2 (MG592629)	3	0	0																																			0
Pseudomonas phage TC6 (MG676466)	3	0	0																																			0
Pseudomonas phage PA11 (NC_007808)	3	0	0																																			0
Shewanella phage Spp001 (NC_023594)	3	0	0																																			0
Pseudomonas phage UFV-P2 (NC_018850)	3	0	0																																			0
Vibrio phage 1.293.O._10N.261.52.E1 (MG592660)	3	0	0																																			0
Pseudomonas phage Bjorn (NC_042103)	3	0	0																																			0
Shewanella phage SppYZU05 (NC_047824)	3	0	0																																			0
Pseudomonas phage phiIBB-PAA2 (NC_022971)	3	0	0																																			0
Pseudomonas phage phiPA01_EW (MG589386)	3	0	0																																			0
Pseudomonas phage PaP4 (NC_042343)	3	0	0																																			0
Pseudomonas phage DL54 (NC_028919)	3	0	0																																			0
Pseudomonas virus LUZ24 (NC_010325)	3	0	0																																			0
Pseudomonas phage TL (NC_023583)	3	0	0																																			0
Pseudomonas phage vB_PaeP_C2-10_Ab22 (NC_026599)	3	0	0																																			0
Pseudomonas phage SL4 (MF768469)	3	0	0																																			0
Pseudomonas phage SaPL (MH973725)	3	0	0																																			0
Pseudomonas phage U47 (MN562749)	3	0	0																																			0
Pseudomonas phage oldone (MT119371)	3	0	0																																			0
Pseudomonas phage vB_PaeP_p2-10_Or1 (NC_019813)	3	0	0																																			0
Pseudomonas virus Pa223 (MK837012)	3	0	0																																			0
Pseudomonas phage vB_PaeP_C1-14_Or (HE983844)	3	0	0																																			0
Pseudomonas phage PhiCHU (NC_028933)	3	0	0																																			0
Pseudomonas virus PaP3 (NC_004466)	3	0	0																																			0
Pseudomonas phage MR299-2 (JN254801)	3	0	0																																			0
Pseudomonas phage Delta (MG432151)	3	0	0																																			0
Pseudomonas phage clash (MT119362)	3	0	0																																			0
Pseudomonas phage otherone (MT119373)	3	0	0																																			0
Pseudomonas phage phiPA01_302 (MG589385)	3	0	0																																			0
Pseudomonas virus Pa222 (MK837011)	3	0	0																																			0
Pseudomonas phage Epa1 (MT108723)	3	0	0																																			0
Vibrio phage 1.208.B._10N.222.52.A7 (MG592578)	3	0	0																																			0
Pseudoalteromonas phage RIO-1 (NC_021300)	3	0	0																																			0
Sinorhizobium phage phiN3 (NC_028945)	3	0	0																																			0
[truncated: 2,480 more rows]
[truncated: 102 more columns]

## Sheet: Table S7
Table S7. vConTACT-based neighbors of vB_SspS_KASIA, vB_SspS_MuM16-1, vB_SspM_MuM16-2 and vB_SspM_M16-3 phages. The table shows the results of proteome-based phages clustering and the resulting assignmentof viral clusters and status.
vB_SspS_KASIA
vc_subcluster	vConTACT status	Phage name	Host name	Refseq acc	Genbank acc	Realm	Kingdom	Phylum	Class	Order	Family	Subfamily	Genus	Reference	Comment
563_0	Clustered/Singleton	Colwellia phage 9A	Colwellia psychrerythraea	NC_018088	HQ317390	Duplodnaviria	Heunggongvirae	Uroviricota	Caudoviricetes	Caudovirales	Siphoviridae	unclassified	Franklinbayvirus	[9]
563_1	Clustered/Singleton	vB_SspS_KASIA	Shewanella sp. M16		MZ568826	Duplodnaviria	Heunggongvirae	Uroviricota	Caudoviricetes	Caudovirales	Siphoviridae	unclassified	unclassified	this study
vB_SspM_M16-3
vc_subcluster	vConTACT status	Phage name	Host name	Refseq acc	Genbank acc	Realm	Kingdom	Phylum	Class	Order	Family	Subfamily	Genus	Reference	Comment
15_0	Clustered	Burkholderia phage AP3	Burkholderia cenocepacia	NC_047752	KP966108	Duplodnaviria	Heunggongvirae	Uroviricota	Caudoviricetes	Caudovirales	Myoviridae	Peduovirinae	Kisquinquevirus	[10]
15_0	Clustered	Burkholderia phage BEK	Burkholderia pseudomallei		CP008753	Duplodnaviria	Heunggongvirae	Uroviricota	Caudoviricetes	Caudovirales	Myoviridae	Peduovirinae	Tigrvirus	unpublished
15_0	Clustered	Burkholderia phage FLC5	Burkholderia glumae		LC528882	Duplodnaviria	Heunggongvirae	Uroviricota	Caudoviricetes	Caudovirales	Myoviridae	Peduovirinae	Kisquattuordecimvirus	[11]
15_0	Clustered	Burkholderia phage KL3	Burkholderia ambifaria	NC_015266	GU911304	Duplodnaviria	Heunggongvirae	Uroviricota	Caudoviricetes	Caudovirales	Myoviridae	Peduovirinae	Tigrvirus	[12]
15_0	Clustered	Burkholderia phage KS14	Burkholderia cenocepacia	NC_015273	HM461982	Duplodnaviria	Heunggongvirae	Uroviricota	Caudoviricetes	Caudovirales	Myoviridae	Peduovirinae	Kisquattuordecimvirus	[12]
15_0	Clustered	Burkholderia phage KS5	Burkholderia cenocepacia	NC_015265	GU911303	Duplodnaviria	Heunggongvirae	Uroviricota	Caudoviricetes	Caudovirales	Myoviridae	Peduovirinae	Kisquinquevirus	[12]
15_0	Clustered	Burkholderia phage Mana	Burkholderia gladioli		MT701591	Duplodnaviria	Heunggongvirae	Uroviricota	Caudoviricetes	Caudovirales	Myoviridae	Peduovirinae	Kisquinquevirus	unpublished
15_0	Clustered	Burkholderia phage phiX216	Burkholderia pseudomallei		JX681814	Duplodnaviria	Heunggongvirae	Uroviricota	Caudoviricetes	Caudovirales	Myoviridae	Peduovirinae	Tigrvirus	[13]
15_0	Clustered	Burkholderia phage ST79	Burkholderia pseudomallei	NC_021343	KC462197	Duplodnaviria	Heunggongvirae	Uroviricota	Caudoviricetes	Caudovirales	Myoviridae	Peduovirinae	Nampongvirus	[15]
15_0	Clustered	Burkholderia virus phi52237	Burkholderia pseudomallei	NC_007145	DQ087285	Duplodnaviria	Heunggongvirae	Uroviricota	Caudoviricetes	Caudovirales	Myoviridae	Peduovirinae	Tigrvirus	unpublished
15_0	Clustered	Burkholderia virus phiE122	Burkholderia pseudomallei	NC_009236	CP000624	Duplodnaviria	Heunggongvirae	Uroviricota	Caudoviricetes	Caudovirales	Myoviridae	Peduovirinae	Tigrvirus	unpublished
15_0	Clustered	Burkholderia virus phiE202	Burkholderia thailandensis	NC_009234	CP000623	Duplodnaviria	Heunggongvirae	Uroviricota	Caudoviricetes	Caudovirales	Myoviridae	Peduovirinae	Tigrvirus	unpublished
15_0	Clustered	Pseudomonas phage Dobby	Pseudomonas aeruginosa	NC_048109	MK034952	Duplodnaviria	Heunggongvirae	Uroviricota	Caudoviricetes	Caudovirales	Myoviridae	Peduovirinae	Citexvirus	[15]
15_0	Clustered	Pseudomonas phage vB_Pae_BR319a	Pseudomonas aeruginosa		MK511066	Duplodnaviria	Heunggongvirae	Uroviricota	Caudoviricetes	Caudovirales	Myoviridae	Peduovirinae	Citexvirus	[16]	partial genome
15_0	Clustered	Pseudomonas virus phiCTX	Pseudomonas aeruginosa	NC_003278	AB008550	Duplodnaviria	Heunggongvirae	Uroviricota	Caudoviricetes	Caudovirales	Myoviridae	Peduovirinae	Citexvirus	[17]
15_0	Clustered	Ralstonia phage RsoM1USA	Ralstonia solanacearum	NC_049432	MG747435	Duplodnaviria	Heunggongvirae	Uroviricota	Caudoviricetes	Caudovirales	Myoviridae	Peduovirinae	Aresaunavirus	[18]
15_0	Clustered	Ralstonia phage RSY1	Ralstonia solanacearum	NC_025115	AB981169	Duplodnaviria	Heunggongvirae	Uroviricota	Caudoviricetes	Caudovirales	Myoviridae	Peduovirinae	Aresaunavirus	[19]
15_0	Clustered	Ralstonia virus RSA1	Ralstonia solanacearum	NC_009382	AB276040	Duplodnaviria	Heunggongvirae	Uroviricota	Caudoviricetes	Caudovirales	Myoviridae	Peduovirinae	Aresaunavirus	[20]
15_0	Clustered	Stenotrophomonas phage Smp131	Stenotrophomonas maltophilia	NC_023588	JQ809663	Duplodnaviria	Heunggongvirae	Uroviricota	Caudoviricetes	Caudovirales	Myoviridae	Peduovirinae	Simpcentumvirus	[21]
27_0	Clustered	Enterobacter phage phiT5282H	Enterobacter cloacae	NC_049429	MG589387	Duplodnaviria	Heunggongvirae	Uroviricota	Caudoviricetes	Caudovirales	Myoviridae	Peduovirinae	Senquatrovirus	unpublished
27_0	Clustered	Enterobacteria phage P88	Escherichia coli	NC_026014	KP063541	Duplodnaviria	Heunggongvirae	Uroviricota	Caudoviricetes	Caudovirales	Myoviridae	Peduovirinae	Peduovirus	[22]
27_0	Clustered	Escherichia phage 500465-2	Escherichia coli	NC_049343	CP025901	Duplodnaviria	Heunggongvirae	Uroviricota	Caudoviricetes	Caudovirales	Myoviridae	Peduovirinae	Peduovirus	unpublished
27_0	Clustered	Escherichia phage 503458	Escherichia coli	NC_049341	CP025874	Duplodnaviria	Heunggongvirae	Uroviricota	Caudoviricetes	Caudovirales	Myoviridae	Peduovirinae	Peduovirus	unpublished
27_0	Clustered	Escherichia phage 520873	Escherichia coli	NC_049344	CP025923	Duplodnaviria	Heunggongvirae	Uroviricota	Caudoviricetes	Caudovirales	Myoviridae	Peduovirinae	Peduovirus	unpublished
27_0	Clustered	Escherichia virus P88_4B11	Escherichia coli	NC_049391	LR595891	Duplodnaviria	Heunggongvirae	Uroviricota	Caudoviricetes	Caudovirales	Myoviridae	Peduovirinae	Peduovirus	unpublished
27_0	Clustered	Klebsiella phage 3LV2017	Klebsiella pneumoniae	NC_047817	KY271397	Duplodnaviria	Heunggongvirae	Uroviricota	Caudoviricetes	Caudovirales	Myoviridae	Peduovirinae	Reginaelenavirus	[22]
27_0	Clustered	Klebsiella phage ST101-KPC2phi6.2	Klebsiella pneumoniae		MK416016	Duplodnaviria	Heunggongvirae	Uroviricota	Caudoviricetes	Caudovirales	Myoviridae	Peduovirinae	Peduovirus	[23]
27_0	Clustered	Klebsiella phage ST16-OXA48phi5.4	Klebsiella pneumoniae	NC_049450	MK416015	Duplodnaviria	Heunggongvirae	Uroviricota	Caudoviricetes	Caudovirales	Myoviridae	Peduovirinae	Peduovirus	[23]
27_0	Clustered	Salmonella phage SEN4	Salmonella enterica	NC_029015	KT630645	Duplodnaviria	Heunggongvirae	Uroviricota	Caudoviricetes	Caudovirales	Myoviridae	Peduovirinae	Senquatrovirus	[24]
27_0	Clustered	Salmonella phage SEN5	Salmonella enterica	NC_028701	KT630646	Duplodnaviria	Heunggongvirae	Uroviricota	Caudoviricetes	Caudovirales	Myoviridae	Peduovirinae	Senquatrovirus	[24]
31_0	Clustered	Mannheimia phage phiMhaA1-BAA410	Mannheimia haemolytica		DQ426905	Duplodnaviria	Heunggongvirae	Uroviricota	Caudoviricetes	Caudovirales	Myoviridae	Peduovirinae	Baylorvirus	[25]
31_0	Clustered	Mannheimia phage vB_MhM_1127AP1	Mannheimia haemolytica	NC_047750	KP137436	Duplodnaviria	Heunggongvirae	Uroviricota	Caudoviricetes	Caudovirales	Myoviridae	Peduovirinae	Baylorvirus	[26,27]
31_0	Clustered	Mannheimia phage vB_MhM_1152AP1	Mannheimia haemolytica		JN255163	Duplodnaviria	Heunggongvirae	Uroviricota	Caudoviricetes	Caudovirales	Myoviridae	Peduovirinae	Baylorvirus	[26,27]
31_0	Clustered	Mannheimia phage vB_MhM_2256AP1	Mannheimia haemolytica		KP137438	Duplodnaviria	Heunggongvirae	Uroviricota	Caudoviricetes	Caudovirales	Myoviridae	Peduovirinae	Baylorvirus	[26,27]
31_0	Clustered	Mannheimia phage vB_MhM_535AP1	Mannheimia haemolytica		KP137432	Duplodnaviria	Heunggongvirae	Uroviricota	Caudoviricetes	Caudovirales	Myoviridae	Peduovirinae	Baylorvirus	[26,27]
31_0	Clustered	Mannheimia phage vB_MhM_587AP1	Mannheimia haemolytica	NC_028898	KP137434	Duplodnaviria	Heunggongvirae	Uroviricota	Caudoviricetes	Caudovirales	Myoviridae	Peduovirinae	Baylorvirus	[26,27]
31_0	Clustered	Mannheimia virus PHL101	Mannheimia haemolytica	NC_008201	DQ426904	Duplodnaviria	Heunggongvirae	Uroviricota	Caudoviricetes	Caudovirales	Myoviridae	Peduovirinae	Baylorvirus	[25]
60_0	Clustered	Vibrio phage vB_VpaM_MAR	Vibrio parahaemolyticus	NC_019722	JX556417	Duplodnaviria	Heunggongvirae	Uroviricota	Caudoviricetes	Caudovirales	Myoviridae	unclassified	Vhmlvirus	[28]
60_0	Clustered	Vibrio phage VHML	Vibrio harveyi	NC_004456	AY133112	Duplodnaviria	Heunggongvirae	Uroviricota	Caudoviricetes	Caudovirales	Myoviridae	unclassified	Vhmlvirus	[29]
60_0	Clustered	Vibrio phage VP585	Vibrio parahaemolyticus	NC_027981	FN297812	Duplodnaviria	Heunggongvirae	Uroviricota	Caudoviricetes	Caudovirales	Myoviridae	unclassified	Vhmlvirus	[30]
107_0	Clustered	Escherichia phage 500465-1	Escherichia coli	NC_049342	CP025900	Duplodnaviria	Heunggongvirae	Uroviricota	Caudoviricetes	Caudovirales	Myoviridae	Peduovirinae	Peduovirus	unpublished
107_0	Clustered	Klebsiella phage 4LV2017	Klebsiella pneumoniae	NC_047818	KY271398	Duplodnaviria	Heunggongvirae	Uroviricota	Caudoviricetes	Caudovirales	Myoviridae	Peduovirinae	Felsduovirus	[22]
107_0	Clustered	Klebsiella phage ST11-OXA245phi3.1	Klebsiella pneumoniae		MK416009	Duplodnaviria	Heunggongvirae	Uroviricota	Caudoviricetes	Caudovirales	Myoviridae	Peduovirinae	Peduovirus	[23]
107_0	Clustered	Klebsiella phage ST11-OXA48phi15.3	Klebsiella pneumoniae		MK433580	Duplodnaviria	Heunggongvirae	Uroviricota	Caudoviricetes	Caudovirales	Myoviridae	Peduovirinae	Peduovirus	[23]
107_0	Clustered	Klebsiella phage ST11-VIM1phi8.4	Klebsiella pneumoniae		MK416020	Duplodnaviria	Heunggongvirae	Uroviricota	Caudoviricetes	Caudovirales	Myoviridae	Peduovirinae	Peduovirus	[23]
107_0	Clustered	Klebsiella phage ST13-OXA48phi12.1	Klebsiella pneumoniae	NC_049453	MK422453	Duplodnaviria	Heunggongvirae	Uroviricota	Caudoviricetes	Caudovirales	Myoviridae	Peduovirinae	Peduovirus	[23]
107_0	Clustered	Klebsiella phage ST15-OXA48phi14.1	Klebsiella pneumoniae	NC_049454	MK433578	Duplodnaviria	Heunggongvirae	Uroviricota	Caudoviricetes	Caudovirales	Myoviridae	Peduovirinae	Peduovirus	[23]
107_0	Clustered	Klebsiella phage ST258-KPC3phi16.1	Klebsiella pneumoniae		MK433581	Duplodnaviria	Heunggongvirae	Uroviricota	Caudoviricetes	Caudovirales	Myoviridae	Peduovirinae	Peduovirus	[23]
107_0	Clustered	Klebsiella phage ST258-KPC3phi16.2	Klebsiella pneumoniae		MK433582	Duplodnaviria	Heunggongvirae	Uroviricota	Caudoviricetes	Caudovirales	Myoviridae	Peduovirinae	Peduovirus	[23]
107_0	Clustered	Klebsiella phage ST340-VIM1phi10.2	Klebsiella pneumoniae		MK422454	Duplodnaviria	Heunggongvirae	Uroviricota	Caudoviricetes	Caudovirales	Myoviridae	Peduovirinae	Peduovirus	[23]
107_0	Clustered	Klebsiella phage ST437-OXA245phi4.1	Klebsiella pneumoniae	NC_049448	MK416011	Duplodnaviria	Heunggongvirae	Uroviricota	Caudoviricetes	Caudovirales	Myoviridae	Peduovirinae	Peduovirus	[23]
107_0	Clustered	Klebsiella phage ST437-OXA245phi4.2	Klebsiella pneumoniae	NC_049449	MK416012	Duplodnaviria	Heunggongvirae	Uroviricota	Caudoviricetes	Caudovirales	Myoviridae	Peduovirinae	Peduovirus	[23]
107_0	Clustered	Klebsiella phage ST512-KPC3phi13.2	Klebsiella pneumoniae	NC_049452	MK422449	Duplodnaviria	Heunggongvirae	Uroviricota	Caudoviricetes	Caudovirales	Myoviridae	Peduovirinae	Peduovirus	[23]
107_0	Clustered	Klebsiella phage ST512-KPC3phi13.6	Klebsiella pneumoniae		MK433577	Duplodnaviria	Heunggongvirae	Uroviricota	Caudoviricetes	Caudovirales	Myoviridae	Peduovirinae	Peduovirus	[23]
107_0	Clustered	Salmonella phage RE2010	Salmonella enterica	NC_019488	HM770079	Duplodnaviria	Heunggongvirae	Uroviricota	Caudoviricetes	Caudovirales	Myoviridae	Peduovirinae	Felsduovirus	[31]
107_0	Clustered	Salmonella phage SEN8	Salmonella enterica	NC_047753	KT630647	Duplodnaviria	Heunggongvirae	Uroviricota	Caudoviricetes	Caudovirales	Myoviridae	Peduovirinae	Felsduovirus	[24]
107_0	Clustered	Salmonella virus Fels2	Salmonella enterica subsp. enterica, Salmonella typhimurium	NC_010463		Duplodnaviria	Heunggongvirae	Uroviricota	Caudoviricetes	Caudovirales	Myoviridae	Peduovirinae	Felsduovirus	[32]
488_0	Clustered	Bacteriophage R18C	Citrobacter rodentium ICC169, Escherichia coli K-12, Shigella sonnei 75/02, Shigella sonnei 866-F	NC_049461	MN016939	Duplodnaviria	Heunggongvirae	Uroviricota	Caudoviricetes	Caudovirales	Myoviridae	Peduovirinae	Stockinghallvirus	[33]
488_0	Clustered	Enterobacteria phage fiAA91-ss	Escherichia coli, Shigella sonnei	NC_022750	KF322032	Duplodnaviria	Heunggongvirae	Uroviricota	Caudoviricetes	Caudovirales	Myoviridae	Peduovirinae	Stockinghallvirus	[34]
488_0	Clustered	Erwinia phage EtG	Erwinia tracheiphila	NC_047833	MF276773	Duplodnaviria	Heunggongvirae	Uroviricota	Caudoviricetes	Caudovirales	Myoviridae	Peduovirinae	Peduovirus	[35]
488_0	Clustered	Escherichia phage 186	Escherichia coli	NC_001317		Duplodnaviria	Heunggongvirae	Uroviricota	Caudoviricetes	Caudovirales	Myoviridae	Peduovirinae	Eganvirus	[36,37]
488_0	Clustered	Escherichia phage pro147	Escherichia coli	NC_028896	KR073660	Duplodnaviria	Heunggongvirae	Uroviricota	Caudoviricetes	Caudovirales	Myoviridae	Peduovirinae	Eganvirus	unpublished
488_0	Clustered	Escherichia phage pro483	Escherichia coli	NC_028943	KR073661	Duplodnaviria	Heunggongvirae	Uroviricota	Caudoviricetes	Caudovirales	Myoviridae	Peduovirinae	Peduovirus	unpublished
488_0	Clustered	Escherichia phage vB_EcoM-12474II	Escherichia coli		MK907236	Duplodnaviria	Heunggongvirae	Uroviricota	Caudoviricetes	Caudovirales	Myoviridae	Peduovirinae	Peduovirus	[38]
488_0	Clustered	Escherichia phage vB_EcoM-12474III	Escherichia coli	NC_049457	MK907237	Duplodnaviria	Heunggongvirae	Uroviricota	Caudoviricetes	Caudovirales	Myoviridae	Peduovirinae	Peduovirus	[38]
488_0	Clustered	Escherichia phage vB_EcoM-12474IV	Escherichia coli		MK907238	Duplodnaviria	Heunggongvirae	Uroviricota	Caudoviricetes	Caudovirales	Myoviridae	Peduovirinae	Peduovirus	[38]
488_0	Clustered	Escherichia phage vB_EcoM-12474V	Escherichia coli		MK907239	Duplodnaviria	Heunggongvirae	Uroviricota	Caudoviricetes	Caudovirales	Myoviridae	Peduovirinae	Peduovirus	[38]
488_0	Clustered	Escherichia phage Wphi	Escherichia coli	NC_005056	AY135739	Duplodnaviria	Heunggongvirae	Uroviricota	Caudoviricetes	Caudovirales	Myoviridae	Peduovirinae	Peduovirus	[39]
488_0	Clustered	Escherichia virus P2	Escherichia coli	NC_041848	KC618326	Duplodnaviria	Heunggongvirae	Uroviricota	Caudoviricetes	Caudovirales	Myoviridae	Peduovirinae	Peduovirus	[40]
488_0	Clustered	Escherichia virus P2_2H1	Escherichia coli	NC_049386	LR595870	Duplodnaviria	Heunggongvirae	Uroviricota	Caudoviricetes	Caudovirales	Myoviridae	Peduovirinae	Peduovirus	unpublished
488_0	Clustered	Escherichia virus P2_2H4	Escherichia coli	NC_049385	LR595869	Duplodnaviria	Heunggongvirae	Uroviricota	Caudoviricetes	Caudovirales	Myoviridae	Peduovirinae	Peduovirus	unpublished
488_0	Clustered	Escherichia virus P2_4A7b	Escherichia coli	NC_049390	LR595887	Duplodnaviria	Heunggongvirae	Uroviricota	Caudoviricetes	Caudovirales	Myoviridae	Peduovirinae	Peduovirus	unpublished
488_0	Clustered	Escherichia virus P2_4B2	Escherichia coli	NC_049387	LR595873	Duplodnaviria	Heunggongvirae	Uroviricota	Caudoviricetes	Caudovirales	Myoviridae	Peduovirinae	Peduovirus	unpublished
488_0	Clustered	Escherichia virus P2_4C9	Escherichia coli	NC_049388	LR595883	Duplodnaviria	Heunggongvirae	Uroviricota	Caudoviricetes	Caudovirales	Myoviridae	Peduovirinae	Peduovirus	unpublished
488_0	Clustered	Escherichia virus P2_4E6b	Escherichia coli	NC_049389	LR595885	Duplodnaviria	Heunggongvirae	Uroviricota	Caudoviricetes	Caudovirales	Myoviridae	Peduovirinae	Peduovirus	unpublished
488_0	Clustered	Klebsiella phage ST147-VIM1phi7.1	Klebsiella pneumoniae	NC_049451	MK416018	Duplodnaviria	Heunggongvirae	Uroviricota	Caudoviricetes	Caudovirales	Myoviridae	Peduovirinae	Peduovirus	[23]
488_0	Clustered	Salmonella phage FSLSP004	Salmonella enterica	NC_021774	KC139521	Duplodnaviria	Heunggongvirae	Uroviricota	Caudoviricetes	Caudovirales	Myoviridae	Peduovirinae	Stockinghallvirus	[41]
488_0	Clustered	Salmonella phage SEN1	Salmonella enterica	NC_029003	KT630644	Duplodnaviria	Heunggongvirae	Uroviricota	Caudoviricetes	Caudovirales	Myoviridae	Peduovirinae	Eganvirus	[24]
488_0	Clustered	Salmonella phage SI22	Salmonella sp.		MK972710	Duplodnaviria	Heunggongvirae	Uroviricota	Caudoviricetes	Caudovirales	Myoviridae	Peduovirinae	Eganvirus	[42]
488_0	Clustered	Salmonella phage SW9	Salmonella sp.	NC_049459	MK972711	Duplodnaviria	Heunggongvirae	Uroviricota	Caudoviricetes	Caudovirales	Myoviridae	Peduovirinae	Eganvirus	[42]
488_0	Clustered	Salmonella virus PsP3	Salmonella sp.	NC_005340	AY135486	Duplodnaviria	Heunggongvirae	Uroviricota	Caudoviricetes	Caudovirales	Myoviridae	Peduovirinae	Eganvirus	[43]
488_0	Clustered	Yersinia phage vB_YpM_22	Yersinia pestis		MT374855	Duplodnaviria	Heunggongvirae	Uroviricota	Caudoviricetes	Caudovirales	Myoviridae	Peduovirinae	Peduovirus	unpublished
488_0	Clustered	Yersinia phage vB_YpM_46	Yersinia pestis		MT374857	Duplodnaviria	Heunggongvirae	Uroviricota	Caudoviricetes	Caudovirales	Myoviridae	Peduovirinae	Peduovirus	unpublished
488_0	Clustered	Yersinia phage vB_YpM_50	Yersinia pestis		MT374858	Duplodnaviria	Heunggongvirae	Uroviricota	Caudoviricetes	Caudovirales	Myoviridae	Peduovirinae	Peduovirus	unpublished
488_0	Clustered	Yersinia virus L413C	Yersinia pestis	NC_004745	AY251033	Duplodnaviria	Heunggongvirae	Uroviricota	Caudoviricetes	Caudovirales	Myoviridae	Peduovirinae	Peduovirus	[44]
	Outlier	Erwinia phage ENT90	Erwinia amylovora	NC_019932	HQ110084	Duplodnaviria	Heunggongvirae	Uroviricota	Caudoviricetes	Caudovirales	Myoviridae	Peduovirinae	Entnonagintavirus	unpublished
	Outlier	vB_SspM_M16-3	Shewanella sp. M16		MZ568829	Duplodnaviria	Heunggongvirae	Uroviricota	Caudoviricetes	Caudovirales	Myoviridae	unclassified	unclassified	this study
vB_SspS_MuM16-1, vB_SspM_MuM16-2
vc_subcluster	vConTACT status	Phage name	Host name	Refseq acc	Genbank acc	Realm	Kingdom	Phylum	Class	Order	Family	Subfamily	Genus	Reference	Comment	Isolation source/Origin
22_0	Clustered	Haemophilus phage SuMu	Haemophilus parasuis 34086b	NC_019455	JF832915	Duplodnaviria	Heunggongvirae	Uroviricota	Caudoviricetes	Caudovirales	Myoviridae	unclassified	unclassified	[45]		induced with mitomycin C
22_0	Clustered	Mannheimia phage vB_MhM_3927AP2	Mannheimia haemolytica	NC_028766	KP137440	Duplodnaviria	Heunggongvirae	Uroviricota	Caudoviricetes	Caudovirales	Myoviridae	unclassified	unclassified	[26,27]		induced with mitomycin C
23_0	Clustered	Pseudomonas phage JBD16C	Pseudomonas aeruginosa PA14		KU199707	Duplodnaviria	Heunggongvirae	Uroviricota	Caudoviricetes	Caudovirales	Siphoviridae	unclassified	Casadabanvirus	[46]		induced with mitomycin C
23_0	Clustered	Pseudomonas phage JBD24	Pseudomonas aeruginosa PA14	NC_020203	JX434031	Duplodnaviria	Heunggongvirae	Uroviricota	Caudoviricetes	Caudovirales	Siphoviridae	unclassified	Casadabanvirus	[46]		induced with mitomycin C
23_0	Clustered	Pseudomonas phage JBD30	Pseudomonas aeruginosa PA14	NC_020198	JX434032	Duplodnaviria	Heunggongvirae	Uroviricota	Caudoviricetes	Caudovirales	Siphoviridae	unclassified	Casadabanvirus	[46]		induced with mitomycin C
23_0	Clustered	Pseudomonas phage JBD69	Pseudomonas aeruginosa PA14	NC_030908	KU199708	Duplodnaviria	Heunggongvirae	Uroviricota	Caudoviricetes	Caudovirales	Siphoviridae	unclassified	Casadabanvirus	[46]	partial genome	induced with mitomycin C
23_0	Clustered	Pseudomonas phage JBD88a	Pseudomonas aeruginosa PA14	NC_020200	JX434033	Duplodnaviria	Heunggongvirae	Uroviricota	Caudoviricetes	Caudovirales	Siphoviridae	unclassified	Casadabanvirus	[46]		induced with mitomycin C
23_0	Clustered	Pseudomonas phage JBD93	Pseudomonas aeruginosa PA14	NC_030918	KU199709	Duplodnaviria	Heunggongvirae	Uroviricota	Caudoviricetes	Caudovirales	Siphoviridae	unclassified	Casadabanvirus	[46]		induced with mitomycin C
23_0	Clustered	Pseudomonas phage MP42	Pseudomonas aeruginosa PA14	NC_018274	JQ762257	Duplodnaviria	Heunggongvirae	Uroviricota	Caudoviricetes	Caudovirales	Siphoviridae	unclassified	Casadabanvirus	[47,48]		induced, spontaneous induction
23_0	Clustered	Pseudomonas phage MP48	Pseudomonas aeruginosa PA14	NC_024782	KF475786	Duplodnaviria	Heunggongvirae	Uroviricota	Caudoviricetes	Caudovirales	Siphoviridae	unclassified	Casadabanvirus	[47,48]		induced, spontaneous induction
23_0	Clustered	Pseudomonas phage vB_Pae_BR327a	Pseudomonas aeruginosa BR327		MK511036	Duplodnaviria	Heunggongvirae	Uroviricota	Caudoviricetes	Caudovirales	Siphoviridae	unclassified	Casadabanvirus	unpublished		no data
23_0	Clustered	Pseudomonas phage vB_Pae_CF28a	Pseudomonas aeruginosa CF28		MK511018	Duplodnaviria	Heunggongvirae	Uroviricota	Caudoviricetes	Caudovirales	Siphoviridae	unclassified	Casadabanvirus	unpublished	partial genome	induced with norfloxacin
23_0	Clustered	Pseudomonas phage vB_PaeS_PAO1_Ab30	Pseudomonas aeruginosa	NC_026601	LN610590	Duplodnaviria	Heunggongvirae	Uroviricota	Caudoviricetes	Caudovirales	Siphoviridae	unclassified	Casadabanvirus	[49]	partial genome	environmental phage
23_0	Clustered	Pseudomonas phage vB_PaeS_PcyII-40_PfII40a	Pseudomonas aeruginosa PcyII-40		LT608331	Duplodnaviria	Heunggongvirae	Uroviricota	Caudoviricetes	Caudovirales	Siphoviridae	unclassified	Casadabanvirus	unpublished		identified as prophage
23_0	Clustered	Pseudomonas virus DMS3	Pseudomonas aeruginosa PA14	NC_008717	DQ631426	Duplodnaviria	Heunggongvirae	Uroviricota	Caudoviricetes	Caudovirales	Siphoviridae	unclassified	Casadabanvirus	[50]		no data
23_0	Clustered	Pseudomonas virus FHA0480	Pseudomonas aeruginosa PA14	NC_041851	JN808773	Duplodnaviria	Heunggongvirae	Uroviricota	Caudoviricetes	Caudovirales	Siphoviridae	unclassified	Casadabanvirus	unpublished		no data
23_0	Clustered	Pseudomonas virus MP22	Pseudomonas aeruginosa PA14	NC_009818	DQ873690	Duplodnaviria	Heunggongvirae	Uroviricota	Caudoviricetes	Caudovirales	Siphoviridae	unclassified	Casadabanvirus	[51]		no data
23_0	Clustered	Pseudomonas virus MP38	Pseudomonas aeruginosa PA14	NC_011611	EU272037	Duplodnaviria	Heunggongvirae	Uroviricota	Caudoviricetes	Caudovirales	Siphoviridae	unclassified	Casadabanvirus	unpublished		no data
35_0	Clustered	Escherichia phage D108	Escherichia coli	NC_013594	GQ357916	Duplodnaviria	Heunggongvirae	Uroviricota	Caudoviricetes	Caudovirales	Myoviridae	unclassified	Muvirus	[52]		induced with mitomycin C
35_0	Clustered	Escherichia phage Mu	Escherichia coli	NC_000929	AF083977	Duplodnaviria	Heunggongvirae	Uroviricota	Caudoviricetes	Caudovirales	Myoviridae	unclassified	Muvirus	[53]		induced with temperature
35_0	Clustered	Escherichia virus Mu_3F6	Escherichia coli		LR595867	Duplodnaviria	Heunggongvirae	Uroviricota	Caudoviricetes	Caudovirales	Myoviridae	unclassified	Muvirus	[54]		environmental phage
35_0	Clustered	Shigella phage SfMu	Shigella flexneri	NC_027382	KP010268	Duplodnaviria	Heunggongvirae	Uroviricota	Caudoviricetes	Caudovirales	Myoviridae	unclassified	Muvirus	[55]		induced with UV
35_0	Clustered	Yersinia phage vB_YpM_23	Yersinia pestis		MT374856	Duplodnaviria	Heunggongvirae	Uroviricota	Caudoviricetes	Caudovirales	Myoviridae	unclassified	Muvirus	unpublished		no data
35_0	Clustered	Yersinia phage vB_YpM_3	Yersinia pestis		MT374852	Duplodnaviria	Heunggongvirae	Uroviricota	Caudoviricetes	Caudovirales	Myoviridae	unclassified	Muvirus	unpublished		no data
35_0	Clustered	Yersinia phage vB_YpM_5	Yersinia pestis		MT374853	Duplodnaviria	Heunggongvirae	Uroviricota	Caudoviricetes	Caudovirales	Myoviridae	unclassified	Muvirus	unpublished		no data
35_0	Clustered	Yersinia phage vB_YpM_6	Yersinia pestis		MT374854	Duplodnaviria	Heunggongvirae	Uroviricota	Caudoviricetes	Caudovirales	Myoviridae	unclassified	Muvirus	unpublished		no data
35_0	Clustered	Yersinia phage vB_YpM_Tongde	Yersinia pestis		MT591577	Duplodnaviria	Heunggongvirae	Uroviricota	Caudoviricetes	Caudovirales	Myoviridae	unclassified	Muvirus	unpublished		no data
36_0	Clustered	Pelagibaca phage vB_PeaS-P1	Pelagibaca abyssi JLT2014		KT381865	Duplodnaviria	Heunggongvirae	Uroviricota	Caudoviricetes	Caudovirales	Siphoviridae	unclassified	unclassified	[56]		induced with mitomycin C
36_0	Clustered	Rhodobacter phage RC1	Rhodobacter sp. E32	NC_020839	JF974308	Duplodnaviria	Heunggongvirae	Uroviricota	Caudoviricetes	Caudovirales	Siphoviridae	unclassified	unclassified	[57]		environmental phage
36_0	Clustered	Rhodovulum phage RS1	Rhodovulum sp. P122A	NC_020866	JF974307	Duplodnaviria	Heunggongvirae	Uroviricota	Caudoviricetes	Caudovirales	Siphoviridae	unclassified	unclassified	unpublished		no data
36_0	Clustered	Rhodovulum phage vB_RhkS_P1	Rhodovulum sp. P5	NC_031059	KX077179	Duplodnaviria	Heunggongvirae	Uroviricota	Caudoviricetes	Caudovirales	Siphoviridae	unclassified	unclassified	[68]		induced with mitomycin C
36_0	Clustered	Thiobacimonas phage vB_ThpS-P1	Thiobacimonas profunda JLT2016		KT381864	Duplodnaviria	Heunggongvirae	Uroviricota	Caudoviricetes	Caudovirales	Siphoviridae	unclassified	unclassified	[56]		induced with mitomycin C
37_0	Clustered	vB_SspM_MuM16-2	Shewanella sp. M16		MZ568828	Duplodnaviria	Heunggongvirae	Uroviricota	Caudoviricetes	Caudovirales	Myoviridae	unclassified	unclassified	this study		identified as prophage
37_0	Clustered	Vibrio phage 1.028.O._10N.286.45.B6	Vibrio sp.		MG592412	Duplodnaviria	Heunggongvirae	Uroviricota	Caudoviricetes	Caudovirales	Myoviridae	unclassified	unclassified	[7,8]	partial genome	environmental phage
37_0	Clustered	Vibrio phage 1.136.O._10N.261.45.E11	Vibrio sp.		MG592507	Duplodnaviria	Heunggongvirae	Uroviricota	Caudoviricetes	Caudovirales	Myoviridae	unclassified	unclassified	[7,8]	partial genome	environmental phage
37_0	Clustered	Vibrio phage 1.142.O._10N.261.49.E11	Vibrio sp.		MG592513	Duplodnaviria	Heunggongvirae	Uroviricota	Caudoviricetes	Caudovirales	Myoviridae	unclassified	unclassified	[7,8]	partial genome	environmental phage
37_0	Clustered	Vibrio phage 1.156.O._10N.261.45.A6	Vibrio sp.		MG592524	Duplodnaviria	Heunggongvirae	Uroviricota	Caudoviricetes	Caudovirales	Myoviridae	unclassified	unclassified	[7,8]	partial genome	environmental phage
37_0	Clustered	Vibrio phage 1.159.O._10N.261.46.F12	Vibrio sp.		MG592527	Duplodnaviria	Heunggongvirae	Uroviricota	Caudoviricetes	Caudovirales	Myoviridae	unclassified	unclassified	[7,8]	partial genome	environmental phage
37_0	Clustered	Vibrio phage 1.217.O._10N.261.45.A1	Vibrio sp.		MG592588	Duplodnaviria	Heunggongvirae	Uroviricota	Caudoviricetes	Caudovirales	Myoviridae	unclassified	unclassified	[7,8]	partial genome	environmental phage
37_0	Clustered	Vibrio phage 1.219.O._10N.261.45.E2	Vibrio sp.		MG592589	Duplodnaviria	Heunggongvirae	Uroviricota	Caudoviricetes	Caudovirales	Myoviridae	unclassified	unclassified	[7,8]	partial genome	environmental phage
37_0	Clustered	Vibrio phage 2.159.A._10N.261.46.F12	Vibrio sp.		MG592669	Duplodnaviria	Heunggongvirae	Uroviricota	Caudoviricetes	Caudovirales	Myoviridae	unclassified	unclassified	[7,8]	partial genome	environmental phage
37_0	Clustered	Vibrio phage 2.159.B._10N.261.46.F12	Vibrio sp.		MG592670	Duplodnaviria	Heunggongvirae	Uroviricota	Caudoviricetes	Caudovirales	Myoviridae	unclassified	unclassified	[7,8]	partial genome	environmental phage
37_0	Clustered	Vibrio phage martha 12B12	Vibrio splendidus	NC_021070	HQ316581	Duplodnaviria	Heunggongvirae	Uroviricota	Caudoviricetes	Caudovirales	Myoviridae	unclassified	unclassified	unpublished		no data
38_0	Clustered	Pseudomonas phage UMP151	Pseudomonas aeruginosa		MK934841	Duplodnaviria	Heunggongvirae	Uroviricota	Caudoviricetes	Caudovirales	Siphoviridae	unclassified	unclassified	[59]		spontaneously induced
39_0	Clustered	vB_SspS_MuM16-1	Shewanella sp. M16		MZ568827	Duplodnaviria	Heunggongvirae	Uroviricota	Caudoviricetes	Caudovirales	Siphoviridae	unclassified	unclassified	this study		induced with mitomycin C
50_0	Clustered	Burkholderia phage KS10	Burkholderia cenocepacia	NC_011216	EU822883	Duplodnaviria	Heunggongvirae	Uroviricota	Caudoviricetes	Caudovirales	Myoviridae	unclassified	unclassified	[60]		spontaneously induced
50_0	Clustered	Curvibacter phage TJ1	Curvibacter sp. AEP1.3		MH766655	Duplodnaviria	Heunggongvirae	Uroviricota	Caudoviricetes	Caudovirales	Myoviridae	unclassified	unclassified	[61]		induced with mitomycin C
783_0	Clustered	Vibrio phage 1.004.O._10N.261.54.A2	Vibrio lentus		MG592391	Duplodnaviria	Heunggongvirae	Uroviricota	Caudoviricetes	Caudovirales	Siphoviridae	unclassified	unclassified	[7,8]	partial genome	environmental phage
783_0	Clustered	Vibrio phage 1.037.O._10N.261.52.F7	Vibrio lentus		MG592421	Duplodnaviria	Heunggongvirae	Uroviricota	Caudoviricetes	Caudovirales	Siphoviridae	unclassified	unclassified	[7,8]	partial genome	environmental phage
783_0	Clustered	Vibrio phage 1.056.O._10N.261.48.C11	Vibrio lentus		MG592436	Duplodnaviria	Heunggongvirae	Uroviricota	Caudoviricetes	Caudovirales	Siphoviridae	unclassified	unclassified	[7,8]	partial genome	environmental phage
783_0	Clustered	Vibrio phage 1.066.O._10N.286.46.E8	Vibrio lentus		MG592443	Duplodnaviria	Heunggongvirae	Uroviricota	Caudoviricetes	Caudovirales	Siphoviridae	unclassified	unclassified	[7,8]	partial genome	environmental phage
783_0	Clustered	Vibrio phage 1.068.O._10N.261.51.F8	Vibrio lentus		MG592445	Duplodnaviria	Heunggongvirae	Uroviricota	Caudoviricetes	Caudovirales	Siphoviridae	unclassified	unclassified	[7,8]	partial genome	environmental phage
783_0	Clustered	Vibrio phage 1.072.O._10N.286.48.A12	no data		MG592449	Duplodnaviria	Heunggongvirae	Uroviricota	Caudoviricetes	Caudovirales	Siphoviridae	unclassified	unclassified	[7,8]	partial genome	environmental phage
783_0	Clustered	Vibrio phage 2.044.O._10N.261.51.B8	Vibrio lentus		MG592661	Duplodnaviria	Heunggongvirae	Uroviricota	Caudoviricetes	Caudovirales	Siphoviridae	unclassified	unclassified	[7,8]	partial genome	environmental phage
784_0	Clustered	Shewanella sp. phage 1/44	Shewanella sp. 44	NC_025463	KJ018213	Duplodnaviria	Heunggongvirae	Uroviricota	Caudoviricetes	Caudovirales	Siphoviridae	unclassified	unclassified	[1]		environmental phage
784_0	Clustered	Vibrio phage 1.049.O._10N.286.54.B5	Shewanella sp.		MG592431	Duplodnaviria	Heunggongvirae	Uroviricota	Caudoviricetes	Caudovirales	Siphoviridae	unclassified	unclassified	[7,8]	partial genome	environmental phage
784_0	Clustered	Vibrio phage 1.050.O._10N.286.48.A6	Shewanella sp.		MG592432	Duplodnaviria	Heunggongvirae	Uroviricota	Caudoviricetes	Caudovirales	Siphoviridae	unclassified	unclassified	[7,8]	partial genome	environmental phage
784_0	Clustered	Vibrio phage 1.055.O._10N.286.55.E9	Enterovibrio norvegicus		MG592435	Duplodnaviria	Heunggongvirae	Uroviricota	Caudoviricetes	Caudovirales	Siphoviridae	unclassified	unclassified	[7,8]	partial genome	environmental phage
784_0	Clustered	Vibrio phage 1.083.O._10N.286.52.B9	Shewanella sp.		MG592458	Duplodnaviria	Heunggongvirae	Uroviricota	Caudoviricetes	Caudovirales	Siphoviridae	unclassified	unclassified	[7,8]	partial genome	environmental phage
784_0	Clustered	Vibrio phage 2.096.O._10N.286.48.B5	Shewanella sp.		MG592666	Duplodnaviria	Heunggongvirae	Uroviricota	Caudoviricetes	Caudovirales	Siphoviridae	unclassified	unclassified	[7,8]	partial genome	environmental phage
	Outlier	Alteromonadaceae phage B23	Alteromonadaceae sp.		KY939598	Duplodnaviria	Heunggongvirae	Uroviricota	Caudoviricetes	Caudovirales	Myoviridae	unclassified	unclassified	unpublished		no data
	Outlier	Alteromonas phage JH01	Alteromonas marina		MH445500	Duplodnaviria	Heunggongvirae	Uroviricota	Caudoviricetes	Caudovirales	Siphoviridae	unclassified	unclassified	[62]		environmental phage
	Outlier	Ochrobactrum phage POA1180	Ochrobactrum anthropi		KX669658	Duplodnaviria	Heunggongvirae	Uroviricota	Caudoviricetes	Caudovirales	Myoviridae	unclassified	unclassified	[63]	partial genome	induced with mitomycin C
	Outlier	Pasteurella phage AFS-2018a	Pasteurella multocida 3927A		MH238466	Duplodnaviria	Heunggongvirae	Uroviricota	Caudoviricetes	Caudovirales	Myoviridae	unclassified	Bcepmuvirus	unpublished		no data
	Outlier	Pseudoalteromonas phage B8b	Pseudoalteromonas sp. QC-44		KM000061	Duplodnaviria	Heunggongvirae	Uroviricota	Caudoviricetes	Caudovirales	Siphoviridae	unclassified	unclassified	[63]	partial genome	environmental phage
	Outlier	Pseudoalteromonas phage B8b	Pseudoalteromonas sp. QC-44		KJ944830	Duplodnaviria	Heunggongvirae	Uroviricota	Caudoviricetes	Caudovirales	Siphoviridae	unclassified	unclassified	[64]	partial genome	environmental phage
	Outlier	Ralstonia phage RS138	Ralstonia solanacearum	NC_029107	AB916497	Duplodnaviria	Heunggongvirae	Uroviricota	Caudoviricetes	Caudovirales	Siphoviridae	unclassified	unclassified	[65]		environmental phage

## Sheet: Table S8
Table S8. Mu-like phages' protein clusters. Only clusters composed of at least 10 proteins are listed.
General summary
Cluster size			Number of clusters
51			2
47			1
46			2
43			1
33			1
31			1
30			3
29			1
28			1
26			2
25			5
24			2
23			3
22			1
21			6
20			1
18			2
17			7
16			9
15			5
14			3
13			3
12			5
11			8
10			12
Detailed summary
---- 51 ----
Phage name	Phage acc. no.	Protein acc. no.	Product	Protein location
Ochrobactrum phage POA1180	KX669658.1	AOT25311.1	hypothetical protein	2311..3931(1)
Alteromonadaceae phage B23	KY939598.1	AVI04944.1	hypothetical protein	14771..16340(1)
Escherichia virus Mu 3F6	LR595867.1	VUD37890.1	portal protein	14761..16300(1)
Vibrio phage 1.028.O. 10N.286.45.B6	MG592412.1	AUR82811.1	portal protein	13574..15131(1)
Vibrio phage 1.136.O. 10N.261.45.E11	MG592507.1	AUR90032.1	portal protein	13574..15131(1)
Vibrio phage 1.142.O. 10N.261.49.E11	MG592513.1	AUR90350.1	portal protein	13574..15131(1)
Vibrio phage 1.156.O. 10N.261.45.A6	MG592524.1	AUR91146.1	portal protein	13574..15131(1)
Vibrio phage 1.159.O. 10N.261.46.F12	MG592527.1	AUR91327.1	portal protein	13574..15131(1)
Vibrio phage 1.217.O. 10N.261.45.A1	MG592588.1	AUR96225.1	portal protein	13574..15131(1)
Vibrio phage 1.219.O. 10N.261.45.E2	MG592589.1	AUR96275.1	portal protein	13574..15131(1)
Vibrio phage 2.159.A. 10N.261.46.F12	MG592669.1	AUS02509.1	portal protein	13574..15131(1)
Vibrio phage 2.159.B. 10N.261.46.F12	MG592670.1	AUS02559.1	portal protein	13574..15131(1)
Pasteurella phage AFS-2018a	MH238466.1	AWY03245.1	portal protein	13357..14779(1)
Curvibacter phage TJ1	MH766655.1	QDB70108.1	hypothetical protein	2359..3919(-1)
Yersinia phage vB_YpM 3	MT374852.1	QKE55349.1	hypothetical protein	14412..15951(1)
Yersinia phage vB_YpM 5	MT374853.1	QKE55414.1	hypothetical protein	19759..21298(1)
Yersinia phage vB_YpM 6	MT374854.1	QKE55466.1	hypothetical protein	18383..19922(1)
Yersinia phage vB_YpM 23	MT374856.1	QKE55558.1	hypothetical protein	18314..19853(1)
Yersinia phage vB_YpM_Tongde	MT591577.1	QMP18930.1	hypothetical protein	20902..22441(-1)
Escherichia phage Mu	NC 000929.1	NP 050633.1	DUF935 domain-containing protein	14553..16092(1)
Burkholderia phage KS10	NC 011216.1	YP 002221419.1	DUF935 family protein	1742..3278(-1)
Escherichia phage D108	NC 013594.1	YP 003335776.1	DUF935 domain-containing protein	14602..16141(1)
Haemophilus phage SuMu	NC 019455.1	YP 007002935.1	portal protein gp29	14375..16031(1)
Vibrio phage martha 12B12	NC 021070.1	YP 007877523.1	hypothetical protein	17381..18938(-1)
Shigella phage SfMu	NC 027382.1	YP 009152215.1	DUF935 domain-containing protein	14974..16513(1)
Mannheimia phage vB_MhM_392_AP2	NC 028766.1	YP 009196077.1	DUF935 domain-containing protein	13815..15441(1)
vB_SspM_MuM16-2	MZ568828	MuM16-2_p22	Mu-like prophage FluMu protein gp29	17405..18971(-1)
Thiobacimonas phage vB_ThpS-P1	KT381864.1	ALF02061.1	hypothetical protein	19305..20946(-1)
Pelagibaca phage vB_PeaS-P1	KT381865.1	ALF02112.1	hypothetical protein	20422..21982(-1)
Pseudomonas phage JBD16C	KU199707.1	AMD42523.1	portal protein	14000..15581(1)
Pseudomonas phage vB_PaeS_PcyII-40 PfII40a	LT608331.1	SCM61988.1	Mu-like prophage FluMu protein gp29	14972..16553(1)
Pseudomonas phage vB_Pae_CF28a	MK511018.1	QBI81152.1	hypothetical protein	15431..17012(1)
Pseudomonas phage vB_Pae_BR327a	MK511036.1	QBI82203.1	hypothetical protein	15399..16980(1)
Pseudomonas phage UMP151	MK934841.1	QDF15000.1	portal protein	17090..18665(1)
Pseudomonas virus DMS3	NC 008717.1	YP 950451.1	DUF935 domain-containing protein	14956..16537(1)
Pseudomonas virus MP22	NC 009818.1	YP 001469155.1	DUF935 domain-containing protein	14034..15615(1)
Pseudomonas virus MP38	NC 011611.1	YP 002332341.1	portal protein	15577..17158(1)
Pseudomonas phage MP42	NC 018274.1	YP 006560526.1	portal protein	15361..16942(1)
Pseudomonas phage JBD30	NC 020198.1	YP 007392339.1	DUF935 domain-containing protein	15400..16981(1)
Pseudomonas phage JBD88a	NC 020200.1	YP 007392436.1	DUF935 domain-containing protein	14023..15604(1)
Pseudomonas phage JBD24	NC 020203.1	YP 007392795.1	DUF935 domain-containing protein	15249..16830(1)
Rhodobacter phage RC1	NC 020839.1	YP 007673222.1	hypothetical protein	20151..21795(-1)
Rhodovulum phage RS1	NC 020866.1	YP 007676413.1	hypothetical protein	17972..19616(1)
Pseudomonas phage MP48	NC 024782.1	YP 009055254.1	portal protein	14525..16112(1)
Pseudomonas phage vB_PaeS_PAO1_Ab30	NC 026601.1	YP 009125672.1	DUF935 domain-containing protein	15404..16985(1)
Ralstonia phage RS138	NC 029107.1	YP 009226537.1	DUF935 domain-containing protein	16301..17912(1)
Pseudomonas phage JBD69	NC 030908.1	YP 009273658.1	DUF935 domain-containing protein	15383..16964(1)
Pseudomonas phage JBD93	NC 030918.1	YP 009274618.1	DUF935 domain-containing protein	14561..16142(1)
Rhodovulum phage vB_RhkS_P1	NC 031059.1	YP 009285919.1	DUF935 domain-containing protein	16372..17926(1)
Pseudomonas virus FHA0480	NC 041851.1	YP 009591715.1	DUF935 domain-containing protein	14944..16525(1)
vB_SspS_MuM16-1	MZ568827	MuM16-1_p28	portal protein, Mup29	15323..16925(1)
-------------
Ochrobactrum phage POA1180	KX669658.1	AOT25318.1	virion morphogenesis protein	8994..9474(1)
Alteromonadaceae phage B23	KY939598.1	AVI04951.1	virion morphogenesis protein	21229..21694(1)
Escherichia virus Mu 3F6	LR595867.1	VUD37892.1	Ne1 neck protein	17596..18067(1)
Vibrio phage 1.028.O. 10N.286.45.B6	MG592412.1	AUR82819.1	virion morphogensis protein	20080..20626(1)
Vibrio phage 1.136.O. 10N.261.45.E11	MG592507.1	AUR90040.1	virion morphogensis protein	20080..20626(1)
Vibrio phage 1.142.O. 10N.261.49.E11	MG592513.1	AUR90358.1	virion morphogensis protein	20080..20626(1)
Vibrio phage 1.156.O. 10N.261.45.A6	MG592524.1	AUR91154.1	virion morphogensis protein	20080..20626(1)
Vibrio phage 1.159.O. 10N.261.46.F12	MG592527.1	AUR91335.1	virion morphogensis protein	20080..20626(1)
Vibrio phage 1.217.O. 10N.261.45.A1	MG592588.1	AUR96233.1	virion morphogensis protein	20080..20626(1)
Vibrio phage 1.219.O. 10N.261.45.E2	MG592589.1	AUR96283.1	virion morphogensis protein	20080..20626(1)
Vibrio phage 2.159.A. 10N.261.46.F12	MG592669.1	AUS02517.1	virion morphogensis protein	20080..20626(1)
Vibrio phage 2.159.B. 10N.261.46.F12	MG592670.1	AUS02567.1	virion morphogensis protein	20080..20626(1)
Pasteurella phage AFS-2018a	MH238466.1	AWY03247.1	virion morphogenesis protein	16175..16640(1)
Curvibacter phage TJ1	MH766655.1	QDB70139.1	capsid and scaffold protein	22263..22710(1)
Yersinia phage vB_YpM 3	MT374852.1	QKE55351.1	hypothetical protein	17247..17718(1)
Yersinia phage vB_YpM 5	MT374853.1	QKE55416.1	hypothetical protein	22594..23065(1)
Yersinia phage vB_YpM 6	MT374854.1	QKE55468.1	hypothetical protein	21218..21689(1)
Yersinia phage vB_YpM 23	MT374856.1	QKE55560.1	hypothetical protein	21149..21620(1)
Yersinia phage vB_YpM_Tongde	MT591577.1	QMP18928.1	hypothetical protein	19135..19606(-1)
Escherichia phage Mu	NC 000929.1	NP 050635.1	virion morphogenesis protein	17388..17859(1)
Burkholderia phage KS10	NC 011216.1	YP 002221450.1	virion morphogenesis protein	21682..22114(1)
Escherichia phage D108	NC 013594.1	YP 003335778.1	virion morphogenesis protein	17437..17908(1)
Haemophilus phage SuMu	NC 019455.1	YP 007002938.1	virion morphogenesis protein	17877..18294(1)
Vibrio phage martha 12B12	NC 021070.1	YP 007877515.1	phage virion morphogenesis protein	11864..12410(-1)
Shigella phage SfMu	NC 027382.1	YP 009152217.1	virion morphogenesis protein	17809..18280(1)
Mannheimia phage vB_MhM_392_AP2	NC 028766.1	YP 009196079.1	virion morphogenesis protein	16882..17299(1)
vB_SspM_MuM16-2	MZ568828	MuM16-2_p14	prophage MuSo2, virion morphogenesis protein	11908..12451(-1)
Thiobacimonas phage vB_ThpS-P1	KT381864.1	ALF02059.1	virion morphogenesis protein	17976..18492(-1)
Pelagibaca phage vB_PeaS-P1	KT381865.1	ALF02104.1	virion morphogenesis protein	14894..15401(-1)
Pseudomonas phage JBD16C	KU199707.1	AMD42525.1	capsid and scaffold protein	16866..17334(1)
Pseudomonas phage vB_PaeS_PcyII-40 PfII40a	LT608331.1	SCM61992.1	Prophage MuMc02, virion morphogenesis protein	17838..18306(1)
Pseudomonas phage vB_Pae_CF28a	MK511018.1	QBI81154.1	capsid and scaffold protein	18297..18765(1)
Pseudomonas phage vB_Pae_BR327a	MK511036.1	QBI82205.1	capsid and scaffold protein	18265..18733(1)
Pseudomonas phage UMP151	MK934841.1	QDF15002.1	virion morphogenesis protein	19894..20470(1)
Pseudomonas virus DMS3	NC 008717.1	YP 950453.1	virion morphogenesis protein	17822..18290(1)
Pseudomonas virus MP22	NC 009818.1	YP 001469157.1	virion morphogenesis protein	16900..17368(1)
Pseudomonas virus MP38	NC 011611.1	YP 002332343.1	virion morphogenesis protein	18443..18911(1)
Pseudomonas phage MP42	NC 018274.1	YP 006560528.1	virion morphogenesis protein	18227..18695(1)
Pseudomonas phage JBD30	NC 020198.1	YP 007392341.1	virion morphogenesis protein	18266..18734(1)
Pseudomonas phage JBD88a	NC 020200.1	YP 007392438.1	virion morphogenesis protein	16889..17357(1)
Pseudomonas phage JBD24	NC 020203.1	YP 007392797.1	virion morphogenesis protein	18115..18583(1)
Rhodobacter phage RC1	NC 020839.1	YP 007673220.1	hypothetical protein	18296..18806(-1)
Rhodovulum phage RS1	NC 020866.1	YP 007676415.1	hypothetical protein	20961..21471(1)
Pseudomonas phage MP48	NC 024782.1	YP 009055256.1	virion morphogenesis protein	17397..17865(1)
Pseudomonas phage vB_PaeS_PAO1_Ab30	NC 026601.1	YP 009125674.1	virion morphogenesis protein	18270..18738(1)
Ralstonia phage RS138	NC 029107.1	YP 009226539.1	virion morphogenesis protein	19290..19758(1)
Pseudomonas phage JBD69	NC 030908.1	YP 009273660.1	virion morphogenesis protein	18249..18717(1)
Pseudomonas phage JBD93	NC 030918.1	YP 009274620.1	virion morphogenesis protein	17427..17895(1)
Rhodovulum phage vB_RhkS_P1	NC 031059.1	YP 009285927.1	virion morphogenesis protein	22652..23159(1)
Pseudomonas virus FHA0480	NC 041851.1	YP 009591717.1	virion morphogenesis protein	17810..18278(1)
vB_SspS_MuM16-1	MZ568827	MuM16-1_p30	phage virion morphogenesis protein, Mup31	18252..18714(1)
---- 47 ----
Phage name	Phage acc. no.	Protein acc. no.	Product	Protein location
Ochrobactrum phage POA1180	KX669658.1	AOT25317.1	hypothetical protein	8578..8998(1)
Escherichia virus Mu 3F6	LR595867.1	VUD37897.1	Ad1 adapter protein	20736..21162(1)
Vibrio phage 1.028.O. 10N.286.45.B6	MG592412.1	AUR82818.1	hypothetical protein	19646..20081(1)
Vibrio phage 1.136.O. 10N.261.45.E11	MG592507.1	AUR90039.1	B transposition protein	19646..20081(1)
Vibrio phage 1.142.O. 10N.261.49.E11	MG592513.1	AUR90357.1	hypothetical protein	19646..20081(1)
Vibrio phage 1.156.O. 10N.261.45.A6	MG592524.1	AUR91153.1	hypothetical protein	19646..20081(1)
Vibrio phage 1.159.O. 10N.261.46.F12	MG592527.1	AUR91334.1	hypothetical protein	19646..20081(1)
Vibrio phage 1.217.O. 10N.261.45.A1	MG592588.1	AUR96232.1	hypothetical protein	19646..20081(1)
Vibrio phage 1.219.O. 10N.261.45.E2	MG592589.1	AUR96282.1	hypothetical protein	19646..20081(1)
Vibrio phage 2.159.A. 10N.261.46.F12	MG592669.1	AUS02516.1	hypothetical protein	19646..20081(1)
Vibrio phage 2.159.B. 10N.261.46.F12	MG592670.1	AUS02566.1	hypothetical protein	19646..20081(1)
Pasteurella phage AFS-2018a	MH238466.1	AWY03251.1	hypothetical protein	19372..19807(1)
Yersinia phage vB_YpM 3	MT374852.1	QKE55355.1	hypothetical protein	20387..20813(1)
Yersinia phage vB_YpM 5	MT374853.1	QKE55420.1	hypothetical protein	25734..26160(1)
Yersinia phage vB_YpM 6	MT374854.1	QKE55472.1	hypothetical protein	24358..24784(1)
Yersinia phage vB_YpM 23	MT374856.1	QKE55564.1	hypothetical protein	24289..24715(1)
Yersinia phage vB_YpM_Tongde	MT591577.1	QMP18924.1	hypothetical protein	16019..16445(-1)
Escherichia phage Mu	NC 000929.1	NP 050640.1	DUF1320 family protein	20528..20954(1)
Escherichia phage D108	NC 013594.1	YP 003335784.1	DUF1320 family protein	20577..21003(1)
Haemophilus phage SuMu	NC 019455.1	YP 007002942.1	DUF1320 domain-containing protein	20944..21421(1)
Vibrio phage martha 12B12	NC 021070.1	YP 007877516.1	hypothetical protein	12409..12844(-1)
Shigella phage SfMu	NC 027382.1	YP 009152222.1	DUF1320 family protein	20949..21372(1)
Mannheimia phage vB_Mh_ 3927_AP2	NC 028766.1	YP 009196083.1	DUF1320 domain-containing protein	19933..20359(1)
vB_SspM_MuM16-2	MZ568828	MuM16-2_p15	Mu-like prophage protein GP36	12450..12882(-1)
Thiobacimonas phage vB_ThpS-P1	KT381864.1	ALF02054.1	hypothetical protein	14547..14976(-1)
Pelagibaca phage vB_PeaS-P1	KT381865.1	ALF02105.1	hypothetical protein	15402..15831(-1)
Pseudomonas phage JBD16C	KU199707.1	AMD42534.1	hypothetical protein	21328..21745(1)
Pseudomonas phage vB_PaeS_PcyII-40 PfII40a	LT608331.1	SCM62004.1	hypothetical protein	21963..22380(1)
Pseudomonas phage vB_Pae_CF28a	MK511018.1	QBI81163.1	hypothetical protein	22389..22806(1)
Pseudomonas phage vB_Pae_BR327a	MK511036.1	QBI82214.1	hypothetical protein	22357..22774(1)
Pseudomonas virus DMS3	NC 008717.1	YP 950460.1	DUF1320 domain-containing protein	21623..22040(1)
Pseudomonas virus MP22	NC 009818.1	YP 001469165.1	DUF1320 domain-containing protein	21337..21754(1)
Pseudomonas virus MP38	NC 011611.1	YP 002332348.1	hypothetical protein	21799..22216(1)
Pseudomonas phage MP42	NC 018274.1	YP 006560535.1	hypothetical protein	22055..22472(1)
Pseudomonas phage JBD30	NC 020198.1	YP 007392348.1	DUF1320 domain-containing protein	22094..22511(1)
Pseudomonas phage JBD88a	NC 020200.1	YP 007392447.1	DUF1320 domain-containing protein	21350..21767(1)
Pseudomonas phage JBD24	NC 020203.1	YP 007392806.1	DUF1320 domain-containing protein	22207..22624(1)
Rhodobacter phage RC1	NC 020839.1	YP 007673212.1	hypothetical protein	12884..13313(-1)
Rhodovulum phage RS1	NC 020866.1	YP 007676423.1	hypothetical protein	26454..26883(1)
Pseudomonas phage MP48	NC 024782.1	YP 009055263.1	hypothetical protein	21911..22328(1)
Pseudomonas phage vB_PaeS_PAO1_Ab30	NC 026601.1	YP 009125683.1	DUF1320 domain-containing protein	22362..22779(1)
Ralstonia phage RS138	NC 029107.1	YP 009226545.1	DUF1320 domain-containing protein	23566..23983(1)
Pseudomonas phage JBD69	NC 030908.1	YP 009273667.1	DUF1320 domain-containing protein	22077..22494(1)
Pseudomonas phage JBD93	NC 030918.1	YP 009274628.1	DUF1320 domain-containing protein	21552..21969(1)
Rhodovulum phage vB_RhkS_P1	NC 031059.1	YP 009285926.1	DUF1320 domain-containing protein	22222..22651(1)
Pseudomonas virus FHA0480	NC 041851.1	YP 009591725.1	DUF1320 domain-containing protein	22247..22664(1)
vB_SspS_MuM16-1	MZ568827	MuM16-1_p40	phage protein Mup36	24724..25165(1)
---- 46 ----
Phage name	Phage acc. no.	Protein acc. no.	Product	Protein location
Ochrobactrum phage POA1180	KX669658.1	AOT25313.1	protease	5451..6552(1)
Alteromonadaceae phage B23	KY939598.1	AVI04946.1	I protein	17887..18910(1)
Escherichia virus Mu 3F6	LR595867.1	VUD37894.1	putative protease protein	18263..19349(1)
Vibrio phage 1.028.O. 10N.286.45.B6	MG592412.1	AUR82813.1	hypothetical protein	16230..17202(1)
Vibrio phage 1.136.O. 10N.261.45.E11	MG592507.1	AUR90034.1	hypothetical protein	16230..17202(1)
Vibrio phage 1.142.O. 10N.261.49.E11	MG592513.1	AUR90352.1	hypothetical protein	16230..17202(1)
Vibrio phage 1.156.O. 10N.261.45.A6	MG592524.1	AUR91148.1	hypothetical protein	16230..17202(1)
Vibrio phage 1.159.O. 10N.261.46.F12	MG592527.1	AUR91329.1	hypothetical protein	16230..17202(1)
Vibrio phage 1.217.O. 10N.261.45.A1	MG592588.1	AUR96227.1	hypothetical protein	16230..17202(1)
Vibrio phage 1.219.O. 10N.261.45.E2	MG592589.1	AUR96277.1	hypothetical protein	16230..17202(1)
Vibrio phage 2.159.A. 10N.261.46.F12	MG592669.1	AUS02511.1	hypothetical protein	16230..17202(1)
Vibrio phage 2.159.B. 10N.261.46.F12	MG592670.1	AUS02561.1	hypothetical protein	16230..17202(1)
Yersinia phage vB_YpM 3	MT374852.1	QKE55352.1	hypothetical protein	17914..19000(1)
Yersinia phage vB_YpM 5	MT374853.1	QKE55417.1	hypothetical protein	23261..24347(1)
Yersinia phage vB_YpM 6	MT374854.1	QKE55469.1	hypothetical protein	21885..22971(1)
Yersinia phage vB_YpM 23	MT374856.1	QKE55561.1	hypothetical protein	21816..22902(1)
Yersinia phage vB_YpM_Tongde	MT591577.1	QMP18927.1	hypothetical protein	17856..18939(-1)
Escherichia phage Mu	NC 000929.1	NP 050636.1	protease	18055..19141(1)
Escherichia phage D108	NC 013594.1	YP 003335780.1	protease	18104..19190(1)
Haemophilus phage SuMu	NC 019455.1	YP 007002939.1	bacteriophage Mu I protein gp32	18533..19610(1)
Vibrio phage martha 12B12	NC 021070.1	YP 007877521.1	I protein	15291..16266(-1)
Shigella phage SfMu	NC 027382.1	YP 009152218.1	protease	18476..19562(1)
Mannheimia phage vB_Mh_ 3927_AP2	NC 028766.1	YP 009196080.1	protease	17557..18628(1)
vB_SspM_MuM16-2	MZ568828	MuM16-2_p20	COG4388: Mu-like prophage I protein	15328..16291(-1)
Thiobacimonas phage vB_ThpS-P1	KT381864.1	ALF02058.1	hypothetical protein	16806..17850(-1)
Pelagibaca phage vB_PeaS-P1	KT381865.1	ALF02109.1	hypothetical protein	17731..18757(-1)
Pseudomonas phage vB_PaeS_PcyII-40 PfII40a	LT608331.1	SCM61998.1	Protease	19403..20375(1)
Pseudomonas phage vB_Pae_CF28a	MK511018.1	QBI81159.1	hypothetical protein	19802..20900(1)
Pseudomonas phage vB_Pae_BR327a	MK511036.1	QBI82210.1	hypothetical protein	19770..20868(1)
Pseudomonas phage UMP151	MK934841.1	QDF15003.1	protease/scaffold protein	20680..21790(1)
Pseudomonas virus DMS3	NC 008717.1	YP 950456.1	putative protease (I) and scaffold (Z) protein	19162..20134(1)
Pseudomonas virus MP22	NC 009818.1	YP 001469161.1	protease	18777..19749(1)
Pseudomonas virus MP38	NC 011611.1	YP 002332344.1	protease (I) and scaffold (Z) protein	19239..20211(1)
Pseudomonas phage MP42	NC 018274.1	YP 006560531.1	protease(I) and scaffold(Z) protein	19594..20566(1)
Pseudomonas phage JBD30	NC 020198.1	YP 007392344.1	protease	19507..20605(1)
Pseudomonas phage JBD24	NC 020203.1	YP 007392802.1	protease	19620..20718(1)
Rhodobacter phage RC1	NC 020839.1	YP 007673216.1	I protein	15191..16229(-1)
Rhodovulum phage RS1	NC 020866.1	YP 007676419.1	I protein	23538..24576(1)
Pseudomonas phage MP48	NC 024782.1	YP 009055259.1	protease (I) and scaffold (Z) protein	19351..20323(1)
Pseudomonas phage vB_PaeS_PAO1_Ab30	NC 026601.1	YP 009125679.1	protease	19775..20873(1)
Ralstonia phage RS138	NC 029107.1	YP 009226541.1	protease	20569..21622(1)
Pseudomonas phage JBD69	NC 030908.1	YP 009273663.1	protease	19490..20588(1)
Pseudomonas phage JBD93	NC 030918.1	YP 009274624.1	protease	18866..19964(1)
Rhodovulum phage vB_RhkS_P1	NC 031059.1	YP 009285922.1	hypothetical protein	19598..20627(1)
Pseudomonas virus FHA0480	NC 041851.1	YP 009591722.1	protease	19561..20659(1)
vB_SspS_MuM16-1	MZ568827	MuM16-1_p36	phage protease, Mup32	22049..23207(1)
-------------
Escherichia virus Mu 3F6	LR595867.1	VUD37895.1	Phage major capsid protein	19345..20263(1)
Vibrio phage 1.028.O. 10N.286.45.B6	MG592412.1	AUR82814.1	major head subunit	17205..18102(1)
Vibrio phage 1.136.O. 10N.261.45.E11	MG592507.1	AUR90035.1	major head subunit	17205..18102(1)
Vibrio phage 1.142.O. 10N.261.49.E11	MG592513.1	AUR90353.1	major head subunit	17205..18102(1)
Vibrio phage 1.156.O. 10N.261.45.A6	MG592524.1	AUR91149.1	major head subunit	17205..18102(1)
Vibrio phage 1.159.O. 10N.261.46.F12	MG592527.1	AUR91330.1	major head subunit	17205..18102(1)
Vibrio phage 1.217.O. 10N.261.45.A1	MG592588.1	AUR96228.1	major head subunit	17205..18102(1)
Vibrio phage 1.219.O. 10N.261.45.E2	MG592589.1	AUR96278.1	major head subunit	17205..18102(1)
Vibrio phage 2.159.A. 10N.261.46.F12	MG592669.1	AUS02512.1	major head subunit	17205..18102(1)
Vibrio phage 2.159.B. 10N.261.46.F12	MG592670.1	AUS02562.1	major head subunit	17205..18102(1)
Yersinia phage vB_YpM 3	MT374852.1	QKE55353.1	hypothetical protein	18996..19914(1)
Yersinia phage vB_YpM 5	MT374853.1	QKE55418.1	hypothetical protein	24343..25261(1)
Yersinia phage vB_YpM 6	MT374854.1	QKE55470.1	hypothetical protein	22967..23885(1)
Yersinia phage vB_YpM 23	MT374856.1	QKE55562.1	hypothetical protein	22898..23816(1)
Yersinia phage vB_YpM_Tongde	MT591577.1	QMP18926.1	hypothetical protein	16918..17857(-1)
Escherichia phage Mu	NC 000929.1	NP 050638.1	Mu-like promajor head subunit gpT family protein	19137..20055(1)
Escherichia phage D108	NC 013594.1	YP 003335782.1	Mu-like promajor head subunit gpT family protein	19186..20104(1)
Haemophilus phage SuMu	NC 019455.1	YP 007002940.1	Mu-like promajor head subunit gpT family protein	19609..20533(1)
Vibrio phage martha 12B12	NC 021070.1	YP 007877520.1	major head subunit	14392..15289(-1)
Shigella phage SfMu	NC 027382.1	YP 009152220.1	Mu-like promajor head subunit gpT family protein	19558..20476(1)
Mannheimia phage vB_Mh_ 3927_AP2	NC 028766.1	YP 009196081.1	Mu-like promajor head subunit gpT family protein	18627..19545(1)
vB_SspM_MuM16-2	MZ568828	MuM16-2_p19	phage major capsid protein	14429..15329(-1)
Thiobacimonas phage vB_ThpS-P1	KT381864.1	ALF02056.1	major capsid protein	15466..16360(-1)
Pelagibaca phage vB_PeaS-P1	KT381865.1	ALF02107.1	major capsid protein	16431..17328(-1)
Pseudomonas phage JBD16C	KU199707.1	AMD42531.1	major capsid protein	19743..20658(1)
Pseudomonas phage vB_PaeS_PcyII-40 PfII40a	LT608331.1	SCM62000.1	Mu-like prophage FluMu major head subunit	20378..21293(1)
Pseudomonas phage vB_Pae_CF28a	MK511018.1	QBI81160.1	major capsid protein	20903..21818(1)
Pseudomonas phage vB_Pae_BR327a	MK511036.1	QBI82211.1	major capsid protein	20871..21786(1)
Pseudomonas phage UMP151	MK934841.1	QDF15005.1	major capsid protein	22214..23111(1)
Pseudomonas virus DMS3	NC 008717.1	YP 950457.1	Mu-like promajor head subunit gpT family protein	20137..21052(1)
Pseudomonas virus MP22	NC 009818.1	YP 001469162.1	Mu-like promajor head subunit gpT family protein	19752..20667(1)
Pseudomonas virus MP38	NC 011611.1	YP 002332345.1	hypothetical protein	20214..21129(1)
Pseudomonas phage MP42	NC 018274.1	YP 006560532.1	hypothetical protein	20569..21484(1)
Pseudomonas phage JBD30	NC 020198.1	YP 007392345.1	Mu-like promajor head subunit gpT family protein	20608..21523(1)
Pseudomonas phage JBD88a	NC 020200.1	YP 007392444.1	Mu-like promajor head subunit gpT family protein	19765..20680(1)
Pseudomonas phage JBD24	NC 020203.1	YP 007392803.1	Mu-like promajor head subunit gpT family protein	20721..21636(1)
Rhodobacter phage RC1	NC 020839.1	YP 007673214.1	major head subunit	13855..14749(-1)
Rhodovulum phage RS1	NC 020866.1	YP 007676421.1	major head protein	25018..25912(1)
Pseudomonas phage MP48	NC 024782.1	YP 009055260.1	hypothetical protein	20326..21241(1)
Pseudomonas phage vB_PaeS_PAO1_Ab30	NC 026601.1	YP 009125680.1	Mu-like promajor head subunit gpT family protein	20876..21791(1)
Ralstonia phage RS138	NC 029107.1	YP 009226543.1	Mu-like promajor head subunit gpT family protein	22114..23008(1)
Pseudomonas phage JBD69	NC 030908.1	YP 009273664.1	Mu-like promajor head subunit gpT family protein	20591..21506(1)
Pseudomonas phage JBD93	NC 030918.1	YP 009274625.1	Mu-like promajor head subunit gpT family protein	19967..20882(1)
Rhodovulum phage vB_RhkS_P1	NC 031059.1	YP 009285924.1	Mu-like promajor head subunit gpT family protein	21029..21926(1)
Pseudomonas virus FHA0480	NC 041851.1	YP 009591723.1	major head protein, gpT subunit	20662..21577(1)
vB_SspS_MuM16-1	MZ568827	MuM16-1_p37	phage major head subunit Mup34	23206..24127(1)
---- 43 ----
Phage name	Phage acc. no.	Protein acc. no.	Product	Protein location
Alteromonadaceae phage B23	KY939598.1	AVI04920.1	transposase	1563..3534(1)
Escherichia virus Mu 3F6	LR595867.1	VUD37865.1	DNA transposition protein	1427..3416(1)
Vibrio phage 1.028.O. 10N.286.45.B6	MG592412.1	AUR82786.1	coil containing protein	1439..3407(1)
Vibrio phage 1.136.O. 10N.261.45.E11	MG592507.1	AUR90007.1	virion morphogensis protein	1439..3407(1)
Vibrio phage 1.142.O. 10N.261.49.E11	MG592513.1	AUR90325.1	coil containing protein	1439..3407(1)
Vibrio phage 1.156.O. 10N.261.45.A6	MG592524.1	AUR91121.1	coil containing protein	1439..3407(1)
Vibrio phage 1.159.O. 10N.261.46.F12	MG592527.1	AUR91302.1	coil containing protein	1439..3407(1)
Vibrio phage 1.217.O. 10N.261.45.A1	MG592588.1	AUR96200.1	coil containing protein	1439..3407(1)
Vibrio phage 1.219.O. 10N.261.45.E2	MG592589.1	AUR96250.1	coil containing protein	1439..3407(1)
Vibrio phage 2.159.A. 10N.261.46.F12	MG592669.1	AUS02484.1	coil containing protein	1439..3407(1)
Vibrio phage 2.159.B. 10N.261.46.F12	MG592670.1	AUS02534.1	coil containing protein	1439..3407(1)
Pasteurella phage AFS-2018a	MH238466.1	AWY03226.1	integrase	1413..3402(1)
Yersinia phage vB_YpM 3	MT374852.1	QKE55324.1	hypothetical protein	1435..3427(1)
Yersinia phage vB_YpM 5	MT374853.1	QKE55388.1	hypothetical protein	5929..8023(1)
Yersinia phage vB_YpM 6	MT374854.1	QKE55440.1	hypothetical protein	4553..6647(1)
Yersinia phage vB_YpM 23	MT374856.1	QKE55533.1	hypothetical protein	5337..7329(1)
Yersinia phage vB_YpM_Tongde	MT591577.1	QMP18955.1	hypothetical protein	33754..35836(-1)
Escherichia phage Mu	NC 000929.1	NP 050607.1	Mu transposase C-terminal domain-containing protein	1327..3319(1)
Escherichia phage D108	NC 013594.1	YP 003335751.1	Mu transposase C-terminal domain-containing protein	1278..3267(1)
Haemophilus phage SuMu	NC 019455.1	YP 007002911.1	phage transposase	1546..3523(1)
Vibrio phage martha 12B12	NC 021070.1	YP 007877548.1	transposase	29376..31368(-1)
Shigella phage SfMu	NC 027382.1	YP 009152189.1	Mu transposase C-terminal domain-containing protein	1268..3257(1)
Mannheimia phage vB_Mh_ 3927_AP2	NC 028766.1	YP 009196052.1	DDE-type integrase/transposase/recombinase	1388..3326(1)
vB_SspM_MuM16-2	MZ568828	MuM16-2_p48	Transposase	30555..32565(-1)
Thiobacimonas phage vB_ThpS-P1	KT381864.1	ALF02082.1	hypothetical protein	30548..32654(-1)
Pelagibaca phage vB_PeaS-P1	KT381865.1	ALF02134.1	mobile element protein	31990..34105(-1)
Pseudomonas phage JBD16C	KU199707.1	AMD42501.1	transposase A	1974..4047(1)
Pseudomonas phage vB_PaeS_PcyII-40 PfII40a	LT608331.1	SCM61941.1	transposase	2059..4132(1)
Pseudomonas phage vB_Pae_CF28a	MK511018.1	QBI81126.1	transposase	2774..4718(1)
Pseudomonas phage vB_Pae_BR327a	MK511036.1	QBI82177.1	transposase	2742..4686(1)
Pseudomonas virus DMS3	NC 008717.1	YP 950428.1	putative A transposase	2174..4136(1)
Pseudomonas virus MP22	NC 009818.1	YP 001469134.1	Mu transposase C-terminal domain-containing protein	2058..4131(1)
Pseudomonas virus MP38	NC 011611.1	YP 002332318.1	transposase A	2588..4658(1)
Pseudomonas phage MP42	NC 018274.1	YP 006560503.1	A transposase	2548..4621(1)
Pseudomonas phage JBD30	NC 020198.1	YP 007392313.1	Mu transposase C-terminal domain-containing protein	2589..4659(1)
Pseudomonas phage JBD88a	NC 020200.1	YP 007392412.1	hypothetical protein	2123..4118(1)
Pseudomonas phage JBD24	NC 020203.1	YP 007392768.1	Mu transposase C-terminal domain-containing protein	2316..4386(1)
Pseudomonas phage MP48	NC 024782.1	YP 009055234.1	transposase A	2548..4621(1)
Pseudomonas phage vB_PaeS_PAO1_Ab30	NC 026601.1	YP 009125645.1	putative A transposase	2693..4691(1)
Pseudomonas phage JBD69	NC 030908.1	YP 009273631.1	Mu transposase C-terminal domain-containing protein	2548..4621(1)
Pseudomonas phage JBD93	NC 030918.1	YP 009274593.1	Mu transposase C-terminal domain-containing protein	2049..4119(1)
Rhodovulum phage vB_RhkS_P1	NC 031059.1	YP 009285895.1	Mu transposase C-terminal domain-containing protein	4818..6960(1)
Pseudomonas virus FHA0480	NC 041851.1	YP 009591690.1	Mu transposase C-terminal domain-containing protein	2053..4123(1)
---- 33 ----
Phage name	Phage acc. no.	Protein acc. no.	Product	Protein location
Vibrio phage 1.028.O. 10N.286.45.B6	MG592412.1	AUR82784.1	peptidase S24/S26A/S26B	266..1010(-1)
Vibrio phage 1.136.O. 10N.261.45.E11	MG592507.1	AUR90005.1	protein of unknown function DUF2635	266..1010(-1)
Vibrio phage 1.142.O. 10N.261.49.E11	MG592513.1	AUR90323.1	peptidase S24/S26A/S26B	266..1010(-1)
Vibrio phage 1.156.O. 10N.261.45.A6	MG592524.1	AUR91119.1	peptidase S24/S26A/S26B	266..1010(-1)
Vibrio phage 1.159.O. 10N.261.46.F12	MG592527.1	AUR91300.1	peptidase S24/S26A/S26B	266..1010(-1)
Vibrio phage 1.217.O. 10N.261.45.A1	MG592588.1	AUR96198.1	peptidase S24/S26A/S26B	266..1010(-1)
Vibrio phage 1.219.O. 10N.261.45.E2	MG592589.1	AUR96248.1	peptidase S24/S26A/S26B	266..1010(-1)
Vibrio phage 2.159.A. 10N.261.46.F12	MG592669.1	AUS02482.1	peptidase S24/S26A/S26B	266..1010(-1)
Vibrio phage 2.159.B. 10N.261.46.F12	MG592670.1	AUS02532.1	peptidase S24/S26A/S26B	266..1010(-1)
Pasteurella phage AFS-2018a	MH238466.1	AWY03224.1	transcriptional regulator	218..926(-1)
Curvibacter phage TJ1	MH766655.1	QDB70118.1	Cro/CI family transcriptional regulator	9258..9888(-1)
Haemophilus phage SuMu	NC 019455.1	YP 007002909.1	helix-turn-helix domain-containing protein	352..1072(-1)
vB_SspM_MuM16-2	MZ568828	MuM16-2_p50	prophage MuSo1, transcriptional regulator, Cro/CI family	32967..33702(1)
Thiobacimonas phage vB_ThpS-P1	KT381864.1	ALF02087.1	Cro/CI family transcriptional regulator	35048..35729(1)
Pelagibaca phage vB_PeaS-P1	KT381865.1	ALF02142.1	putative transcriptional regulator	37678..38377(1)
Pseudomonas phage vB_PaeS_PcyII-40 PfII40a	LT608331.1	SCM61932.1	hypothetical protein	169..874(-1)
Pseudomonas phage vB_Pae_CF28a	MK511018.1	QBI81121.1	repressor	229..889(-1)
Pseudomonas phage vB_Pae_BR327a	MK511036.1	QBI82172.1	repressor	197..857(-1)
Pseudomonas virus DMS3	NC 008717.1	YP 950425.2	putative c repressor	169..880(-1)
Pseudomonas virus MP22	NC 009818.1	YP 001469130.1	c repressor	169..799(-1)
Pseudomonas virus MP38	NC 011611.1	YP 002332313.1	c repressor	169..829(-1)
Pseudomonas phage MP42	NC 018274.1	YP 006560498.1	c repressor	169..796(-1)
Pseudomonas phage JBD30	NC 020198.1	YP 007392308.1	helix-turn-helix transcriptional regulator	170..830(-1)
Pseudomonas phage JBD88a	NC 020200.1	YP 007392408.1	helix-turn-helix transcriptional regulator	170..884(-1)
Rhodobacter phage RC1	NC 020839.1	YP 007673254.1	phage repressor	38186..38879(1)
Rhodovulum phage RS1	NC 020866.1	YP 007676381.1	phage repressor	890..1553(-1)
Pseudomonas phage MP48	NC 024782.1	YP 009055229.1	c repressor	169..892(-1)
Pseudomonas phage vB_PaeS_PAO1_Ab30	NC 026601.1	YP 009125640.1	helix-turn-helix transcriptional regulator	202..862(-1)
Pseudomonas phage JBD69	NC 030908.1	YP 009273626.1	helix-turn-helix transcriptional regulator	169..892(-1)
Pseudomonas phage JBD93	NC 030918.1	YP 009274589.1	c repressor	171..885(-1)
Rhodovulum phage vB_RhkS_P1	NC 031059.1	YP 009285887.1	hypothetical protein	1090..1717(-1)
Pseudomonas virus FHA0480	NC 041851.1	YP 009591686.1	helix-turn-helix transcriptional regulator	175..889(-1)
vB_SspS_MuM16-1	MZ568827	MuM16-1_p01	phage repressor protein CI	182..827(-1)
---- 31 ----
Phage name	Phage acc. no.	Protein acc. no.	Product	Protein location
Escherichia virus Mu 3F6	LR595867.1	VUD37878.1	Mor postive regulator of the middle operon	8988..9378(1)
Escherichia virus Mu 3F6	LR595867.1	VUD37882.1	putative transcription regulator	10170..10593(1)
Vibrio phage 1.028.O. 10N.286.45.B6	MG592412.1	AUR82801.1	Mor transcription activator family protein	8223..8622(1)
Vibrio phage 1.136.O. 10N.261.45.E11	MG592507.1	AUR90022.1	Mor transcription activator family protein	8223..8622(1)
Vibrio phage 1.142.O. 10N.261.49.E11	MG592513.1	AUR90340.1	Mor transcription activator family protein	8223..8622(1)
Vibrio phage 1.156.O. 10N.261.45.A6	MG592524.1	AUR91136.1	Mor transcription activator family protein	8223..8622(1)
Vibrio phage 1.159.O. 10N.261.46.F12	MG592527.1	AUR91317.1	Mor transcription activator family protein	8223..8622(1)
Vibrio phage 1.217.O. 10N.261.45.A1	MG592588.1	AUR96215.1	Mor transcription activator family protein	8223..8622(1)
Vibrio phage 1.219.O. 10N.261.45.E2	MG592589.1	AUR96265.1	Mor transcription activator family protein	8223..8622(1)
Vibrio phage 2.159.A. 10N.261.46.F12	MG592669.1	AUS02499.1	Mor transcription activator family protein	8223..8622(1)
Vibrio phage 2.159.B. 10N.261.46.F12	MG592670.1	AUS02549.1	Mor transcription activator family protein	8223..8622(1)
Pasteurella phage AFS-2018a	MH238466.1	AWY03234.1	transcriptional regulator	7405..7780(1)
Yersinia phage vB_YpM 3	MT374852.1	QKE55338.1	hypothetical protein	9011..9401(1)
Yersinia phage vB_YpM 3	MT374852.1	QKE55341.1	hypothetical protein	9821..10244(1)
Yersinia phage vB_YpM 5	MT374853.1	QKE55403.1	hypothetical protein	13800..14190(1)
Yersinia phage vB_YpM 5	MT374853.1	QKE55406.1	hypothetical protein	15168..15591(1)
Yersinia phage vB_YpM 6	MT374854.1	QKE55455.1	hypothetical protein	12424..12814(1)
Yersinia phage vB_YpM 6	MT374854.1	QKE55458.1	hypothetical protein	13792..14215(1)
Yersinia phage vB_YpM 23	MT374856.1	QKE55547.1	hypothetical protein	12913..13303(1)
Yersinia phage vB_YpM 23	MT374856.1	QKE55550.1	hypothetical protein	13723..14146(1)
Yersinia phage vB_YpM_Tongde	MT591577.1	QMP18939.1	hypothetical protein	27018..27441(-1)
Yersinia phage vB_YpM_Tongde	MT591577.1	QMP18941.1	hypothetical protein	27861..28251(-1)
Escherichia phage Mu	NC 000929.1	NP 050621.1	Mor	8780..9170(1)
Escherichia phage Mu	NC 000929.1	NP 050625.1	positive regulator of late transcription	9962..10385(1)
Escherichia phage D108	NC 013594.1	YP 003335764.1	Middle operon regulator	8829..9219(1)
Escherichia phage D108	NC 013594.1	YP 003335768.1	positive regulator of late transcription	10011..10434(1)
Vibrio phage martha 12B12	NC 021070.1	YP 007877534.1	hypothetical protein	24107..24530(-1)
Shigella phage SfMu	NC 027382.1	YP 009152204.1	Middle operon regulator	9570..9960(1)
Shigella phage SfMu	NC 027382.1	YP 009152207.1	positive regulator of late transcription	10380..10803(1)
vB_SspM_MuM16-2	MZ568828	MuM16-2_p33	Middle operon regulator	24154..24586(-1)
vB_SspS_MuM16-1	MZ568827	MuM16-1_p13	regulator of late transcription protein C, Mup21	7460..7922(1)
---- 30 ----
Phage name	Phage acc. no.	Protein acc. no.	Product	Protein location
Ochrobactrum phage POA1180	KX669658.1	AOT25366.1	hypothetical protein	41338..41653(1)
Alteromonadaceae phage B23	KY939598.1	AVI04941.1	hypothetical protein	12584..12884(1)
Escherichia virus Mu 3F6	LR595867.1	VUD37887.1	FIG00638990: hypothetical protein	12221..12512(1)
Vibrio phage 1.028.O. 10N.286.45.B6	MG592412.1	AUR82808.1	ribonuclease R winged-helix domain protein	11095..11386(1)
Vibrio phage 1.136.O. 10N.261.45.E11	MG592507.1	AUR90029.1	ribonuclease R winged-helix domain protein	11095..11386(1)
Vibrio phage 1.142.O. 10N.261.49.E11	MG592513.1	AUR90347.1	ribonuclease R winged-helix domain protein	11095..11386(1)
Vibrio phage 1.156.O. 10N.261.45.A6	MG592524.1	AUR91143.1	ribonuclease R winged-helix domain protein	11095..11386(1)
Vibrio phage 1.159.O. 10N.261.46.F12	MG592527.1	AUR91324.1	ribonuclease R winged-helix domain protein	11095..11386(1)
Vibrio phage 1.217.O. 10N.261.45.A1	MG592588.1	AUR96222.1	ribonuclease R winged-helix domain protein	11095..11386(1)
Vibrio phage 1.219.O. 10N.261.45.E2	MG592589.1	AUR96272.1	ribonuclease R winged-helix domain protein	11095..11386(1)
Vibrio phage 2.159.A. 10N.261.46.F12	MG592669.1	AUS02506.1	ribonuclease R winged-helix domain protein	11095..11386(1)
Vibrio phage 2.159.B. 10N.261.46.F12	MG592670.1	AUS02556.1	ribonuclease R winged-helix domain protein	11095..11386(1)
Pasteurella phage AFS-2018a	MH238466.1	AWY03242.1	hypothetical protein	11164..11467(1)
Yersinia phage vB_YpM 3	MT374852.1	QKE55346.1	hypothetical protein	11872..12163(1)
Yersinia phage vB_YpM 5	MT374853.1	QKE55411.1	hypothetical protein	17219..17510(1)
Yersinia phage vB_YpM 6	MT374854.1	QKE55463.1	hypothetical protein	15843..16134(1)
Yersinia phage vB_YpM 23	MT374856.1	QKE55555.1	hypothetical protein	15774..16065(1)
Yersinia phage vB_YpM_Tongde	MT591577.1	QMP18934.1	hypothetical protein	25099..25390(-1)
Escherichia phage Mu	NC 000929.1	NP 050630.1	hypothetical protein	12013..12304(1)
Escherichia phage D108	NC 013594.1	YP 003335773.1	hypothetical protein	12062..12353(1)
Vibrio phage martha 12B12	NC 021070.1	YP 007877527.1	hypothetical protein	21338..21629(-1)
Shigella phage SfMu	NC 027382.1	YP 009152212.1	hypothetical protein	12434..12725(1)
vB_SspM_MuM16-2	MZ568828	MuM16-2_p26	hypothetical protein	21364..21655(-1)
Thiobacimonas phage vB_ThpS-P1	KT381864.1	ALF02067.1	hypothetical protein	23901..24198(-1)
Pelagibaca phage vB_PeaS-P1	KT381865.1	ALF02118.1	hypothetical protein	24527..24833(-1)
Pseudomonas phage UMP151	MK934841.1	QDF14997.1	hypothetical protein	14568..14871(1)
Rhodobacter phage RC1	NC 020839.1	YP 007673227.1	hypothetical protein	24978..25284(-1)
Rhodovulum phage RS1	NC 020866.1	YP 007676408.1	hypothetical protein	14485..14791(1)
Rhodovulum phage vB_RhkS_P1	NC 031059.1	YP 009285911.1	hypothetical protein	12843..13146(1)
vB_SspS_MuM16-1	MZ568827	MuM16-1_p24	ArsR family transcriptional regulator, Mup26	12553..12850(1)
-------------
Ochrobactrum phage POA1180	KX669658.1	AOT25309.1	terminase small subunit	0..651(1)
Alteromonadaceae phage B23	KY939598.1	AVI04942.1	terminase small subunit	12887..13442(1)
Escherichia virus Mu 3F6	LR595867.1	VUD37888.1	Phage terminase, small subunit	12523..13099(1)
Vibrio phage 1.028.O. 10N.286.45.B6	MG592412.1	AUR82809.1	hypothetical protein	11395..11986(1)
Vibrio phage 1.136.O. 10N.261.45.E11	MG592507.1	AUR90030.1	protein of unknown function DUF3486	11395..11986(1)
Vibrio phage 1.142.O. 10N.261.49.E11	MG592513.1	AUR90348.1	hypothetical protein	11395..11986(1)
Vibrio phage 1.156.O. 10N.261.45.A6	MG592524.1	AUR91144.1	hypothetical protein	11395..11986(1)
Vibrio phage 1.159.O. 10N.261.46.F12	MG592527.1	AUR91325.1	hypothetical protein	11395..11986(1)
Vibrio phage 1.217.O. 10N.261.45.A1	MG592588.1	AUR96223.1	hypothetical protein	11395..11986(1)
Vibrio phage 1.219.O. 10N.261.45.E2	MG592589.1	AUR96273.1	hypothetical protein	11395..11986(1)
Vibrio phage 2.159.A. 10N.261.46.F12	MG592669.1	AUS02507.1	hypothetical protein	11395..11986(1)
Vibrio phage 2.159.B. 10N.261.46.F12	MG592670.1	AUS02557.1	hypothetical protein	11395..11986(1)
Pasteurella phage AFS-2018a	MH238466.1	AWY03243.1	terminase small subunit	11489..12062(1)
Yersinia phage vB_YpM 3	MT374852.1	QKE55347.1	hypothetical protein	12174..12750(1)
Yersinia phage vB_YpM 5	MT374853.1	QKE55412.1	hypothetical protein	17521..18097(1)
Yersinia phage vB_YpM 6	MT374854.1	QKE55464.1	hypothetical protein	16145..16721(1)
Yersinia phage vB_YpM 23	MT374856.1	QKE55556.1	hypothetical protein	16076..16652(1)
Yersinia phage vB_YpM_Tongde	MT591577.1	QMP18933.1	hypothetical protein	24512..25088(-1)
Escherichia phage Mu	NC 000929.1	NP 050631.1	DUF3486 family protein	12315..12891(1)
Escherichia phage D108	NC 013594.1	YP 003335774.1	DUF3486 family protein	12364..12940(1)
Vibrio phage martha 12B12	NC 021070.1	YP 007877526.1	DUF3486 family protein	20738..21329(-1)
Shigella phage SfMu	NC 027382.1	YP 009152213.1	DUF3486 family protein	12736..13312(1)
vB_SspM_MuM16-2	MZ568828	MuM16-2_p25	Phage terminase, small subunit	20761..21355(-1)
Thiobacimonas phage vB_ThpS-P1	KT381864.1	ALF02066.1	terminase small subunit	23339..23900(-1)
Pelagibaca phage vB_PeaS-P1	KT381865.1	ALF02117.1	hypothetical protein	23986..24526(-1)
Pseudomonas phage UMP151	MK934841.1	QDF14998.1	terminase small subunit	14873..15422(1)
Rhodobacter phage RC1	NC 020839.1	YP 007673226.1	hypothetical protein	24386..24977(-1)
Rhodovulum phage RS1	NC 020866.1	YP 007676409.1	hypothetical protein	14792..15383(1)
Rhodovulum phage vB_RhkS_P1	NC 031059.1	YP 009285912.1	DUF3486 family protein	13151..13688(1)
vB_SspS_MuM16-1	MZ568827	MuM16-1_p26	terminase small subunit, Mup27	13114..13684(1)
-------------
Ochrobactrum phage POA1180	KX669658.1	AOT25310.1	terminase large subunit	737..2312(1)
Alteromonadaceae phage B23	KY939598.1	AVI04943.1	terminase large subunit	13434..14772(1)
Escherichia virus Mu 3F6	LR595867.1	VUD37889.1	Phage terminase, large subunit	13106..14762(1)
Vibrio phage 1.028.O. 10N.286.45.B6	MG592412.1	AUR82810.1	terminase-like family protein	11985..13578(1)
Vibrio phage 1.136.O. 10N.261.45.E11	MG592507.1	AUR90031.1	terminase-like family protein	11985..13578(1)
Vibrio phage 1.142.O. 10N.261.49.E11	MG592513.1	AUR90349.1	terminase-like family protein	11985..13578(1)
Vibrio phage 1.156.O. 10N.261.45.A6	MG592524.1	AUR91145.1	terminase-like family protein	11985..13578(1)
Vibrio phage 1.159.O. 10N.261.46.F12	MG592527.1	AUR91326.1	terminase-like family protein	11985..13578(1)
Vibrio phage 1.217.O. 10N.261.45.A1	MG592588.1	AUR96224.1	terminase-like family protein	11985..13578(1)
Vibrio phage 1.219.O. 10N.261.45.E2	MG592589.1	AUR96274.1	terminase-like family protein	11985..13578(1)
Vibrio phage 2.159.A. 10N.261.46.F12	MG592669.1	AUS02508.1	terminase-like family protein	11985..13578(1)
Vibrio phage 2.159.B. 10N.261.46.F12	MG592670.1	AUS02558.1	terminase-like family protein	11985..13578(1)
Pasteurella phage AFS-2018a	MH238466.1	AWY03244.1	terminase large subunit	12048..13356(1)
Yersinia phage vB_YpM 3	MT374852.1	QKE55348.1	hypothetical protein	12757..14413(1)
Yersinia phage vB_YpM 5	MT374853.1	QKE55413.1	hypothetical protein	18104..19760(1)
Yersinia phage vB_YpM 6	MT374854.1	QKE55465.1	hypothetical protein	16728..18384(1)
Yersinia phage vB_YpM 23	MT374856.1	QKE55557.1	hypothetical protein	16659..18315(1)
Yersinia phage vB_YpM_Tongde	MT591577.1	QMP18931.1	hypothetical protein	22440..24096(-1)
Escherichia phage Mu	NC 000929.1	NP 050632.1	putative portal protein	12898..14554(1)
Escherichia phage D108	NC 013594.1	YP 003335775.1	hypothetical protein	12947..14603(1)
Burkholderia phage KS10	NC 021070.1	YP 007877524.1	portal protein	18934..20527(-1)
Vibrio phage martha 12B12	NC 027382.1	YP 009152214.1	hypothetical protein	13319..14975(1)
vB_SspM_MuM16-2	MZ568828	MuM16-2_p23	Mu-like prophage FluMu protein gp28	18967..20626(-1)
Thiobacimonas phage vB_ThpS-P1	KT381864.1	ALF02062.1	terminase large subunit	21055..22468(-1)
Pelagibaca phage vB_PeaS-P1	KT381865.1	ALF02113.1	terminase large subunit	21981..23430(-1)
Pseudomonas phage UMP151	MK934841.1	QDF14999.1	terminase large subunit	15423..17097(1)
Rhodobacter phage RC1	NC 020839.1	YP 007673224.1	hypothetical protein	22114..23812(-1)
Rhodovulum phage RS1	NC 020866.1	YP 007676411.1	hypothetical protein	15957..17655(1)
Rhodovulum phage vB_RhkS_P1	NC 031059.1	YP 009285918.1	terminase	14963..16373(1)
vB_SspS_MuM16-1	MZ568827	MuM16-2_p27	terminase large subunit, Mup28	13683..15324(1)
---- 29 ----
Phage name	Phage acc. no.	Protein acc. no.	Product	Protein location
Escherichia virus Mu 3F6	LR595867.1	VUD37891.1	Phage (Mu-like) virion morphogenesis protein	16280..17600(1)
Pasteurella phage AFS-2018a	MH238466.1	AWY03246.1	head morphogenesis protein	14779..16051(1)
Curvibacter phage TJ1	MH766655.1	QDB70104.1	hypothetical protein	364..1594(-1)
Yersinia phage vB_YpM 3	MT374852.1	QKE55350.1	hypothetical protein	15931..17251(1)
Yersinia phage vB_YpM 5	MT374853.1	QKE55415.1	hypothetical protein	21278..22598(1)
Yersinia phage vB_YpM 6	MT374854.1	QKE55467.1	hypothetical protein	19902..21222(1)
Yersinia phage vB_YpM 23	MT374856.1	QKE55559.1	hypothetical protein	19833..21153(1)
Yersinia phage vB_YpM_Tongde	MT591577.1	QMP18929.1	hypothetical protein	19602..20922(-1)
Escherichia phage Mu	NC 000929.1	NP 050634.1	head morphogenesis protein	16072..17392(1)
Burkholderia phage KS10	NC 011216.1	YP 002221417.1	minor capsid protein	204..1437(-1)
Escherichia phage D108	NC 013594.1	YP 003335777.1	virion morphogenesis	16121..17441(1)
Shigella phage SfMu	NC 027382.1	YP 009152216.1	head morphogenesis protein	16493..17813(1)
Pseudomonas phage JBD16C	KU199707.1	AMD42524.1	virion morphogenesis protein	15580..16867(1)
Pseudomonas phage vB_PaeS_PcyII-40 PfII40a	LT608331.1	SCM61990.1	Phage head morphogenesis protein	16552..17839(1)
Pseudomonas phage vB_Pae_CF28a	MK511018.1	QBI81153.1	virion morphogenesis protein	17011..18298(1)
Pseudomonas phage vB_Pae_BR327a	MK511036.1	QBI82204.1	virion morphogenesis protein	16979..18266(1)
Pseudomonas virus DMS3	NC 008717.1	YP 950452.1	minor capsid protein	16536..17823(1)
Pseudomonas virus MP22	NC 009818.1	YP 001469156.1	minor capsid protein	15614..16901(1)
Pseudomonas virus MP38	NC 011611.1	YP 002332342.1	virion morphogenesis protein	17157..18444(1)
Pseudomonas phage MP42	NC 018274.1	YP 006560527.1	head assembly cofactor	16941..18228(1)
Pseudomonas phage JBD30	NC 020198.1	YP 007392340.1	minor capsid protein	16980..18267(1)
Pseudomonas phage JBD88a	NC 020200.1	YP 007392437.1	minor capsid protein	15603..16890(1)
Pseudomonas phage JBD24	NC 020203.1	YP 007392796.1	minor capsid protein	16829..18116(1)
Pseudomonas phage MP48	NC 024782.1	YP 009055255.1	virion morphogenesis protein	16111..17398(1)
Pseudomonas phage vB_PaeS_PAO1_Ab30	NC 026601.1	YP 009125673.1	minor capsid protein	16984..18271(1)
Pseudomonas phage JBD69	NC 030908.1	YP 009273659.1	minor capsid protein	16963..18250(1)
Pseudomonas phage JBD93	NC 030918.1	YP 009274619.1	minor capsid protein	16141..17428(1)
Pseudomonas virus FHA0480	NC 041851.1	YP 009591716.1	minor capsid protein	16524..17811(1)
vB_SspS_MuM16-1	MZ568827	MuM16-1_p29	phage virion morphogenesis protein, Mup30	16917..18243(1)
---- 28 ----
Phage name	Phage acc. no.	Protein acc. no.	Product	Protein location
Ochrobactrum phage POA1180	KX669658.1	AOT25365.1	hypothetical protein	41012..41342(1)
Escherichia virus Mu 3F6	LR595867.1	VUD37886.1	FIG00638520: hypothetical protein	11925..12225(1)
Vibrio phage 1.028.O. 10N.286.45.B6	MG592412.1	AUR82807.1	coil containing protein	10784..11087(1)
Vibrio phage 1.136.O. 10N.261.45.E11	MG592507.1	AUR90028.1	protein of unknown function DUF2730	10784..11087(1)
Vibrio phage 1.142.O. 10N.261.49.E11	MG592513.1	AUR90346.1	TMhelix containing protein	10784..11087(1)
Vibrio phage 1.156.O. 10N.261.45.A6	MG592524.1	AUR91142.1	coil containing protein	10784..11087(1)
Vibrio phage 1.159.O. 10N.261.46.F12	MG592527.1	AUR91323.1	TMhelix containing protein	10784..11087(1)
Vibrio phage 1.217.O. 10N.261.45.A1	MG592588.1	AUR96221.1	coil containing protein	10784..11087(1)
Vibrio phage 1.219.O. 10N.261.45.E2	MG592589.1	AUR96271.1	TMhelix containing protein	10784..11087(1)
Vibrio phage 2.159.A. 10N.261.46.F12	MG592669.1	AUS02505.1	coil containing protein	10784..11087(1)
Vibrio phage 2.159.B. 10N.261.46.F12	MG592670.1	AUS02555.1	coil containing protein	10784..11087(1)
Pasteurella phage AFS-2018a	MH238466.1	AWY03241.1	hypothetical protein	10838..11168(1)
Yersinia phage vB_YpM 3	MT374852.1	QKE55345.1	hypothetical protein	11576..11876(1)
Yersinia phage vB_YpM 5	MT374853.1	QKE55410.1	hypothetical protein	16923..17223(1)
Yersinia phage vB_YpM 6	MT374854.1	QKE55462.1	hypothetical protein	15547..15847(1)
Yersinia phage vB_YpM 23	MT374856.1	QKE55554.1	hypothetical protein	15478..15778(1)
Yersinia phage vB_YpM_Tongde	MT591577.1	QMP18935.1	hypothetical protein	25386..25686(-1)
Escherichia phage Mu	NC 000929.1	NP 050629.1	DUF2730 family protein	11717..12017(1)
Escherichia phage D108	NC 013594.1	YP 003335772.1	DUF2730 family protein	11766..12066(1)
Vibrio phage martha 12B12	NC 021070.1	YP 007877528.1	DUF2730 family protein	21773..22076(-1)
Shigella phage SfMu	NC 027382.1	YP 009152211.1	DUF2730 family protein	12135..12438(1)
vB_SspM_MuM16-2	MZ568828	MuM16-2_p27	hypothetical protein	21663..21966(-1)
Thiobacimonas phage vB_ThpS-P1	KT381864.1	ALF02068.1	hypothetical protein	24194..24551(-1)
Pseudomonas phage UMP151	MK934841.1	QDF14996.1	hypothetical protein	14251..14572(1)
Rhodobacter phage RC1	NC 020839.1	YP 007673228.1	hypothetical protein	25280..25682(-1)
Rhodovulum phage RS1	NC 020866.1	YP 007676407.1	hypothetical protein	14087..14489(1)
Rhodovulum phage vB_RhkS_P1	NC 031059.1	YP 009285910.1	DUF2730 family protein	12436..12847(1)
vB_SspS_MuM16-1	MZ568827	MuM16-1_p23	phage protein, Mup25	12215..12554(1)
---- 26 ----
Phage name	Phage acc. no.	Protein acc. no.	Product	Protein location
Alteromonadaceae phage B23	KY939598.1	AVI04961.1	putative baseplate assembly protein	29584..30313(1)
Escherichia virus Mu 3F6	LR595867.1	VUD37906.1	Phage baseplate assembly protein V	29022..29616(1)
Vibrio phage 1.028.O. 10N.286.45.B6	MG592412.1	AUR82828.1	hypothetical protein	27833..28439(1)
Vibrio phage 1.136.O. 10N.261.45.E11	MG592507.1	AUR90049.1	hypothetical protein	27833..28439(1)
Vibrio phage 1.142.O. 10N.261.49.E11	MG592513.1	AUR90367.1	hypothetical protein	27833..28439(1)
Vibrio phage 1.156.O. 10N.261.45.A6	MG592524.1	AUR91163.1	hypothetical protein	27833..28439(1)
Vibrio phage 1.159.O. 10N.261.46.F12	MG592527.1	AUR91344.1	hypothetical protein	27833..28439(1)
Vibrio phage 1.217.O. 10N.261.45.A1	MG592588.1	AUR96242.1	hypothetical protein	27833..28439(1)
Vibrio phage 1.219.O. 10N.261.45.E2	MG592589.1	AUR96292.1	hypothetical protein	27833..28439(1)
Vibrio phage 2.159.A. 10N.261.46.F12	MG592669.1	AUS02526.1	hypothetical protein	27833..28439(1)
Vibrio phage 2.159.B. 10N.261.46.F12	MG592670.1	AUS02576.1	hypothetical protein	27833..28439(1)
Pasteurella phage AFS-2018a	MH238466.1	AWY03260.1	baseplate assembly protein	27589..28198(1)
Curvibacter phage TJ1	MH766655.1	QDB70148.1	baseplate protein	30737..31226(1)
Yersinia phage vB_YpM 3	MT374852.1	QKE55364.1	hypothetical protein	28673..29267(1)
Yersinia phage vB_YpM 5	MT374853.1	QKE55429.1	hypothetical protein	34020..34614(1)
Yersinia phage vB_YpM 6	MT374854.1	QKE55481.1	hypothetical protein	32644..33238(1)
Yersinia phage vB_YpM 23	MT374856.1	QKE55573.1	hypothetical protein	32575..33169(1)
Yersinia phage vB_YpM_Tongde	MT591577.1	QMP18915.1	hypothetical protein	7568..8162(-1)
Escherichia phage Mu	NC 000929.1	NP 050649.1	baseplate assembly protein V	28814..29408(1)
Escherichia phage D108	NC 011216.1	YP 002221459.1	baseplate assembly protein	30570..31092(1)
Burkholderia phage KS10	NC 013594.1	YP 003335794.1	baseplate assembly protein V	28863..29457(1)
Haemophilus phage SuMu	NC 019455.1	YP 007002953.1	baseplate assembly protein V	29763..30414(1)
Vibrio phage martha 12B12	NC 021070.1	YP 007877506.1	baseplate assembly protein	3995..4601(-1)
Shigella phage SfMu	NC 027382.1	YP 009152231.1	baseplate assembly protein V	29226..29820(1)
Mannheimia phage vB_Mh_ 3927_AP2	NC 028766.1	YP 009196093.1	baseplate assembly protein	28315..28975(1)
vB_SspM_MuM16-2	MZ568828	MuM16-2_p05	Prophage baseplate assembly protein V	3955..4603(-1)
-------------
Ochrobactrum phage POA1180	KX669658.1	AOT25354.1	sulfate transporter	36122..36746(1)
Alteromonadaceae phage B23	KY939598.1	AVI04923.1	hypothetical protein	4932..5553(1)
Vibrio phage 1.028.O. 10N.286.45.B6	MG592412.1	AUR82790.1	hypothetical protein	5004..5622(1)
Vibrio phage 1.136.O. 10N.261.45.E11	MG592507.1	AUR90011.1	protein of unknown function DUF3164	5004..5622(1)
Vibrio phage 1.142.O. 10N.261.49.E11	MG592513.1	AUR90329.1	hypothetical protein	5004..5622(1)
Vibrio phage 1.156.O. 10N.261.45.A6	MG592524.1	AUR91125.1	hypothetical protein	5004..5622(1)
Vibrio phage 1.159.O. 10N.261.46.F12	MG592527.1	AUR91306.1	hypothetical protein	5004..5622(1)
Vibrio phage 1.217.O. 10N.261.45.A1	MG592588.1	AUR96204.1	hypothetical protein	5004..5622(1)
Vibrio phage 1.219.O. 10N.261.45.E2	MG592589.1	AUR96254.1	hypothetical protein	5004..5622(1)
Vibrio phage 2.159.A. 10N.261.46.F12	MG592669.1	AUS02488.1	hypothetical protein	5004..5622(1)
Vibrio phage 2.159.B. 10N.261.46.F12	MG592670.1	AUS02538.1	hypothetical protein	5004..5622(1)
Curvibacter phage TJ1	MH766655.1	QDB70127.1	hypothetical protein	15354..15975(1)
Burkholderia phage KS10	NC 011216.1	YP 002221437.1	DUF3164 family protein	14367..14994(1)
Vibrio phage martha 12B12	NC 021070.1	YP 007877544.1	hypothetical protein	27192..27810(-1)
Mannheimia phage vB_Mh_ 3927_AP2	NC 028766.1	YP 009196056.1	DUF3164 family protein	4749..5367(1)
vB_SspM_MuM16-2	MZ568828	MuM16-2_p42	hypothetical protein	27836..28451(-1)
Thiobacimonas phage vB_ThpS-P1	KT381864.1	ALF02075.1	hypothetical protein	27357..27978(-1)
Pelagibaca phage vB_PeaS-P1	KT381865.1	ALF02128.1	hypothetical protein	29065..29728(-1)
Pseudomonas phage vB_Pae_CF28a	MK511018.1	QBI81133.1	hypothetical protein	7655..8273(1)
Pseudomonas phage vB_Pae_BR327a	MK511036.1	QBI82184.1	hypothetical protein	7623..8241(1)
Pseudomonas phage UMP151	MK934841.1	QDF14975.1	hypothetical protein	2737..3361(-1)
Rhodobacter phage RC1	NC 020839.1	YP 007673240.1	hypothetical protein	30785..31436(-1)
Rhodovulum phage RS1	NC 020866.1	YP 007676395.1	hypothetical protein	8333..8984(1)
Pseudomonas phage vB_PaeS_PAO1_Ab30	NC 026601.1	YP 009125652.1	DUF3164 family protein	7628..8246(1)
Rhodovulum phage vB_RhkS_P1	NC 031059.1	YP 009285901.1	hypothetical protein	9312..9978(1)
vB_SspS_MuM16-1	MZ568827	MuM16-2_p09	hypothetical protein	5583..6219(1)
---- 25 ----
Phage name	Phage acc. no.	Protein acc. no.	Product	Protein location
Alteromonadaceae phage B23	KY939598.1	AVI04954.1	tail sheath protein	22438..23929(1)
Escherichia virus Mu 3F6	LR595867.1	VUD37900.1	Tail sheath protein	21896..23384(1)
Vibrio phage 1.028.O. 10N.286.45.B6	MG592412.1	AUR82822.1	tail sheath protein	21436..22915(1)
Vibrio phage 1.136.O. 10N.261.45.E11	MG592507.1	AUR90043.1	tail sheath protein	21436..22915(1)
Vibrio phage 1.142.O. 10N.261.49.E11	MG592513.1	AUR90361.1	tail sheath protein	21436..22915(1)
Vibrio phage 1.156.O. 10N.261.45.A6	MG592524.1	AUR91157.1	tail sheath protein	21436..22915(1)
Vibrio phage 1.159.O. 10N.261.46.F12	MG592527.1	AUR91338.1	tail sheath protein	21436..22915(1)
Vibrio phage 1.217.O. 10N.261.45.A1	MG592588.1	AUR96236.1	tail sheath protein	21436..22915(1)
Vibrio phage 1.219.O. 10N.261.45.E2	MG592589.1	AUR96286.1	tail sheath protein	21436..22915(1)
Vibrio phage 2.159.A. 10N.261.46.F12	MG592669.1	AUS02520.1	tail sheath protein	21436..22915(1)
Vibrio phage 2.159.B. 10N.261.46.F12	MG592670.1	AUS02570.1	tail sheath protein	21436..22915(1)
Curvibacter phage TJ1	MH766655.1	QDB70142.1	tail sheath protein	23602..25078(1)
Yersinia phage vB_YpM 3	MT374852.1	QKE55358.1	hypothetical protein	21547..23035(1)
Yersinia phage vB_YpM 5	MT374853.1	QKE55423.1	hypothetical protein	26894..28382(1)
Yersinia phage vB_YpM 6	MT374854.1	QKE55475.1	hypothetical protein	25518..27006(1)
Yersinia phage vB_YpM 23	MT374856.1	QKE55567.1	hypothetical protein	25449..26937(1)
Yersinia phage vB_YpM_Tongde	MT591577.1	QMP18921.1	hypothetical protein	13800..15288(-1)
Escherichia phage Mu	NC 000929.1	NP 050643.1	tail sheath subtilisin-like domain-containing protein	21688..23176(1)
Burkholderia phage KS10	NC 011216.1	YP 002221453.1	tail sheath protein	23021..24500(1)
Escherichia phage D108	NC 013594.1	YP 003335787.1	tail sheath subtilisin-like domain-containing protein	21737..23225(1)
Haemophilus phage SuMu	NC 019455.1	YP 007002946.1	tail sheath subtilisin-like domain-containing protein	22499..23909(1)
Vibrio phage martha 12B12	NC 021070.1	YP 007877512.1	tail sheath protein	9575..11054(-1)
Shigella phage SfMu	NC 027382.1	YP 009152225.1	tail sheath subtilisin-like domain-containing protein	22106..23594(1)
Mannheimia phage vB_Mh_ 3927_AP2	NC 028766.1	YP 009196086.1	tail sheath subtilisin-like domain-containing protein	21176..22586(1)
vB_SspM_MuM16-2	MZ568828	MuM16-2_p11	Bacteriophage tail sheath protein	9598..11080(-1)
-------------
Alteromonadaceae phage B23	KY939598.1	AVI04960.1	tail protein	28553..29594(1)
Escherichia virus Mu 3F6	LR595867.1	VUD37905.1	Phage tail fibers	27895..29035(1)
Vibrio phage 1.028.O. 10N.286.45.B6	MG592412.1	AUR82827.1	late control gene D protein	26727..27837(1)
Vibrio phage 1.136.O. 10N.261.45.E11	MG592507.1	AUR90048.1	late control gene D protein	26727..27837(1)
Vibrio phage 1.142.O. 10N.261.49.E11	MG592513.1	AUR90366.1	late control gene D protein	26727..27837(1)
Vibrio phage 1.156.O. 10N.261.45.A6	MG592524.1	AUR91162.1	late control gene D protein	26727..27837(1)
Vibrio phage 1.159.O. 10N.261.46.F12	MG592527.1	AUR91343.1	late control gene D protein	26727..27837(1)
Vibrio phage 1.217.O. 10N.261.45.A1	MG592588.1	AUR96241.1	late control gene D protein	26727..27837(1)
Vibrio phage 1.219.O. 10N.261.45.E2	MG592589.1	AUR96291.1	late control gene D protein	26727..27837(1)
Vibrio phage 2.159.A. 10N.261.46.F12	MG592669.1	AUS02525.1	late control gene D protein	26727..27837(1)
Vibrio phage 2.159.B. 10N.261.46.F12	MG592670.1	AUS02575.1	late control gene D protein	26727..27837(1)
Curvibacter phage TJ1	MH766655.1	QDB70147.1	tail protein	29622..30738(1)
Yersinia phage vB_YpM 3	MT374852.1	QKE55363.1	hypothetical protein	27546..28686(1)
Yersinia phage vB_YpM 5	MT374853.1	QKE55428.1	hypothetical protein	32893..34033(1)
Yersinia phage vB_YpM 6	MT374854.1	QKE55480.1	hypothetical protein	31517..32657(1)
Yersinia phage vB_YpM 23	MT374856.1	QKE55572.1	hypothetical protein	31448..32588(1)
Yersinia phage vB_YpM_Tongde	MT591577.1	QMP18916.1	hypothetical protein	8149..9289(-1)
Escherichia phage Mu	NC 000929.1	NP 050648.1	baseplate protein	27687..28827(1)
Burkholderia phage KS10	NC 011216.1	YP 002221458.1	MuQ-like tail protein	29413..30571(1)
Escherichia phage D108	NC 013594.1	YP 003335793.1	baseplate protein	27736..28876(1)
Haemophilus phage SuMu	NC 019455.1	YP 007002952.1	Mu-like protail protein gpP	28642..29767(1)
Vibrio phage martha 12B12	NC 021070.1	YP 007877507.1	P protein	4594..5671(-1)
Shigella phage SfMu	NC 027382.1	YP 009152230.1	baseplate protein	28105..29239(1)
Mannheimia phage vB_Mh_ 3927_AP2	NC 028766.1	YP 009196092.1	tail protein	27183..28311(1)
vB_SspM_MuM16-2	MZ568828	MuM16-2_p06	FIG003269: Prophage tail protein	4596..5679(-1)
-------------
Alteromonadaceae phage B23	KY939598.1	AVI04964.1	tail protein	31808..32402(1)
Escherichia virus Mu 3F6	LR595867.1	VUD37909.1	FIG121501: Prophage tail protein	31123..31666(1)
Vibrio phage 1.028.O. 10N.286.45.B6	MG592412.1	AUR82831.1	protein of unknown function DUF2313	29953..30541(1)
Vibrio phage 1.136.O. 10N.261.45.E11	MG592507.1	AUR90052.1	protein of unknown function DUF2313	29953..30541(1)
Vibrio phage 1.142.O. 10N.261.49.E11	MG592513.1	AUR90370.1	protein of unknown function DUF2313	29953..30541(1)
Vibrio phage 1.156.O. 10N.261.45.A6	MG592524.1	AUR91166.1	protein of unknown function DUF2313	29953..30541(1)
Vibrio phage 1.159.O. 10N.261.46.F12	MG592527.1	AUR91347.1	protein of unknown function DUF2313	29953..30541(1)
Vibrio phage 1.217.O. 10N.261.45.A1	MG592588.1	AUR96245.1	protein of unknown function DUF2313	29953..30541(1)
Vibrio phage 1.219.O. 10N.261.45.E2	MG592589.1	AUR96295.1	protein of unknown function DUF2313	29953..30541(1)
Vibrio phage 2.159.A. 10N.261.46.F12	MG592669.1	AUS02529.1	protein of unknown function DUF2313	29953..30541(1)
Vibrio phage 2.159.B. 10N.261.46.F12	MG592670.1	AUS02579.1	protein of unknown function DUF2313	29953..30541(1)
Curvibacter phage TJ1	MH766655.1	QDB70151.1	tail fibers protein	33012..33606(1)
Yersinia phage vB_YpM 3	MT374852.1	QKE55367.1	hypothetical protein	30774..31317(1)
Yersinia phage vB_YpM 5	MT374853.1	QKE55432.1	hypothetical protein	36121..36664(1)
Yersinia phage vB_YpM 6	MT374854.1	QKE55484.1	hypothetical protein	34745..35288(1)
Yersinia phage vB_YpM 23	MT374856.1	QKE55576.1	hypothetical protein	34676..35219(1)
Yersinia phage vB_YpM_Tongde	MT591577.1	QMP18912.1	hypothetical protein	5518..6061(-1)
Escherichia phage Mu	NC 000929.1	NP 050652.1	DUF2313 domain-containing protein	30915..31458(1)
Burkholderia phage KS10	NC 011216.1	YP 002221462.1	DUF2313 domain-containing protein	32878..33478(1)
Escherichia phage D108	NC 013594.1	YP 003335797.1	DUF2313 domain-containing protein	30964..31507(1)
Haemophilus phage SuMu	NC 019455.1	YP 007002956.1	hypothetical protein	31936..32515(1)
Vibrio phage martha 12B12	NC 021070.1	YP 007877503.1	hypothetical protein	1905..2496(-1)
Shigella phage SfMu	NC 027382.1	YP 009152234.1	DUF2313 domain-containing protein	31327..31870(1)
Mannheimia phage vB_Mh_ 3927_AP2	NC 028766.1	YP 009196096.1	DUF2313 domain-containing protein	30517..31108(1)
vB_SspM_MuM16-2	MZ568828	MuM16-2_p02	FIG121501: Prophage tail protein	1869..2454(-1)
-------------
Alteromonadaceae phage B23	KY939598.1	AVI04963.1	tail protein	30759..31821(1)
Escherichia virus Mu 3F6	LR595867.1	VUD37908.1	Phage FluMu protein gp47	30050..31133(1)
Vibrio phage 1.028.O. 10N.286.45.B6	MG592412.1	AUR82830.1	hypothetical protein	28901..29969(1)
Vibrio phage 1.136.O. 10N.261.45.E11	MG592507.1	AUR90051.1	hypothetical protein	28901..29969(1)
Vibrio phage 1.142.O. 10N.261.49.E11	MG592513.1	AUR90369.1	hypothetical protein	28901..29969(1)
Vibrio phage 1.156.O. 10N.261.45.A6	MG592524.1	AUR91165.1	hypothetical protein	28901..29969(1)
Vibrio phage 1.159.O. 10N.261.46.F12	MG592527.1	AUR91346.1	hypothetical protein	28901..29969(1)
Vibrio phage 1.217.O. 10N.261.45.A1	MG592588.1	AUR96244.1	hypothetical protein	28901..29969(1)
Vibrio phage 1.219.O. 10N.261.45.E2	MG592589.1	AUR96294.1	hypothetical protein	28901..29969(1)
Vibrio phage 2.159.A. 10N.261.46.F12	MG592669.1	AUS02528.1	hypothetical protein	28901..29969(1)
Vibrio phage 2.159.B. 10N.261.46.F12	MG592670.1	AUS02578.1	hypothetical protein	28901..29969(1)
Curvibacter phage TJ1	MH766655.1	QDB70150.1	hypothetical protein	31870..33007(1)
Yersinia phage vB_YpM 3	MT374852.1	QKE55366.1	hypothetical protein	29701..30784(1)
Yersinia phage vB_YpM 5	MT374853.1	QKE55431.1	hypothetical protein	35048..36131(1)
Yersinia phage vB_YpM 6	MT374854.1	QKE55483.1	hypothetical protein	33672..34755(1)
Yersinia phage vB_YpM 23	MT374856.1	QKE55575.1	hypothetical protein	33603..34686(1)
Yersinia phage vB_YpM_Tongde	MT591577.1	QMP18913.1	hypothetical protein	6051..7134(-1)
Escherichia phage Mu	NC 000929.1	NP 050651.1	baseplate J/gp47 family protein	29842..30925(1)
Burkholderia phage KS10	NC 011216.1	YP 002221461.1	baseplate J/gp47 family protein	31754..32876(1)
Escherichia phage D108	NC 013594.1	YP 003335796.1	baseplate J/gp47 family protein	29891..30974(1)
Haemophilus phage SuMu	NC 019455.1	YP 007002955.1	baseplate J family protein gp47	30878..31940(1)
Vibrio phage martha 12B12	NC 021070.1	YP 007877504.1	baseplate J-like protein	2480..3548(-1)
Shigella phage SfMu	NC 027382.1	YP 009152233.1	baseplate J/gp47 family protein	30254..31337(1)
Mannheimia phage vB_Mh_ 3927_AP2	NC 028766.1	YP 009196095.1	baseplate J/gp47 family protein	29456..30518(1)
vB_SspM_MuM16-2	MZ568828	MuM16-1_p03	Phage FluMu protein gp47	2438..3506(-1)
-------------
Ochrobactrum phage POA1180	KX669658.1	AOT25351.1	transposase	34536..35526(1)
Alteromonadaceae phage B23	KY939598.1	AVI04921.1	DNA transposition protein	3611..4568(1)
Escherichia virus Mu 3F6	LR595867.1	VUD37866.1	DNA transposition protein	3454..4393(1)
Vibrio phage 1.028.O. 10N.286.45.B6	MG592412.1	AUR82787.1	B transposition protein	3441..4389(1)
Vibrio phage 1.136.O. 10N.261.45.E11	MG592507.1	AUR90008.1	hypothetical protein	3441..4389(1)
Vibrio phage 1.142.O. 10N.261.49.E11	MG592513.1	AUR90326.1	B transposition protein	3441..4389(1)
Vibrio phage 1.156.O. 10N.261.45.A6	MG592524.1	AUR91122.1	B transposition protein	3441..4389(1)
Vibrio phage 1.159.O. 10N.261.46.F12	MG592527.1	AUR91303.1	B transposition protein	3441..4389(1)
Vibrio phage 1.217.O. 10N.261.45.A1	MG592588.1	AUR96201.1	B transposition protein	3441..4389(1)
Vibrio phage 1.219.O. 10N.261.45.E2	MG592589.1	AUR96251.1	B transposition protein	3441..4389(1)
Vibrio phage 2.159.A. 10N.261.46.F12	MG592669.1	AUS02485.1	B transposition protein	3441..4389(1)
Vibrio phage 2.159.B. 10N.261.46.F12	MG592670.1	AUS02535.1	B transposition protein	3441..4389(1)
Pasteurella phage AFS-2018a	MH238466.1	AWY03227.1	integrase	3412..4330(1)
Yersinia phage vB_YpM 3	MT374852.1	QKE55325.1	hypothetical protein	3465..4404(1)
Yersinia phage vB_YpM 5	MT374853.1	QKE55389.1	hypothetical protein	8061..9000(1)
Yersinia phage vB_YpM 6	MT374854.1	QKE55441.1	hypothetical protein	6685..7624(1)
Yersinia phage vB_YpM 23	MT374856.1	QKE55534.1	hypothetical protein	7367..8306(1)
Yersinia phage vB_YpM_Tongde	MT591577.1	QMP18954.1	hypothetical protein	32777..33716(-1)
Escherichia phage Mu	NC 000929.1	NP 050608.1	AAA family ATPase	3357..4296(1)
Escherichia phage D108	NC 013594.1	YP 003335752.1	AAA family ATPase	3305..4244(1)
Haemophilus phage SuMu	NC 019455.1	YP 007002913.1	AAA family ATPase	4038..4920(1)
Vibrio phage martha 12B12	NC 021070.1	YP 007877547.1	AAA family ATPase	28394..29342(-1)
Shigella phage SfMu	NC 027382.1	YP 009152190.1	AAA family ATPase	3295..4234(1)
Mannheimia phage vB_Mh_ 3927_AP2	NC 028766.1	YP 009196053.1	AAA family ATPase	3329..4211(1)
vB_SspM_MuM16-2	MZ568828	MuM16-2_p47	hypothetical protein	29577..30522(-1)
---- 24 ----
Phage name	Phage acc. no.	Protein acc. no.	Product	Protein location
Alteromonadaceae phage B23	KY939598.1	AVI04931.1	hypothetical protein	8645..9050(1)
Curvibacter phage TJ1	MH766655.1	QDB70132.1	hypothetical protein	17621..18104(1)
Burkholderia phage KS10	NC 011216.1	YP 002221443.1	hypothetical protein	17564..17963(1)
Haemophilus phage SuMu	NC 019455.1	YP 007002924.1	hypothetical protein	9616..10042(1)
Mannheimia phage vB_Mh_ 3927_AP2	NC 028766.1	YP 009196067.1	mor transcription activator family protein	9141..9567(1)
Thiobacimonas phage vB_ThpS-P1	KT381864.1	ALF02072.1	hypothetical protein	26253..26643(-1)
Pseudomonas phage vB_PaeS_PcyII-40 PfII40a	LT608331.1	SCM61969.1	Membrane protein	9594..10044(1)
Pseudomonas phage vB_Pae_CF28a	MK511018.1	QBI81141.1	hypothetical protein	10104..10554(1)
Pseudomonas phage vB_Pae_BR327a	MK511036.1	QBI82192.1	hypothetical protein	10072..10522(1)
Pseudomonas virus DMS3	NC 008717.1	YP 950443.1	putative integral membrane protein	9708..10158(1)
Pseudomonas virus MP22	NC 009818.1	YP 001469146.1	putative integral membrane protein	9073..9523(1)
Pseudomonas virus MP38	NC 011611.1	YP 002332331.1	putative integral membrane protein	10205..10655(1)
Pseudomonas phage MP42	NC 018274.1	YP 006560517.1	putative integral membrane protein	10113..10563(1)
Pseudomonas phage JBD30	NC 020198.1	YP 007392328.1	hypothetical protein	10152..10602(1)
Pseudomonas phage JBD88a	NC 020200.1	YP 007392426.1	hypothetical protein	9101..9512(1)
Pseudomonas phage JBD24	NC 020203.1	YP 007392783.1	membrane protein	9922..10372(1)
Rhodobacter phage RC1	NC 020839.1	YP 007673231.1	hypothetical protein	27201..27576(-1)
Rhodovulum phage RS1	NC 020866.1	YP 007676404.1	hypothetical protein	12193..12568(1)
Pseudomonas phage MP48	NC 024782.1	YP 009055246.1	hypothetical protein	9563..10013(1)
Pseudomonas phage vB_PaeS_PAO1_Ab30	NC 026601.1	YP 009125660.1	membrane protein	10077..10527(1)
Ralstonia phage RS138	NC 029107.1	YP 009226529.1	DNA transposition protein	11720..12164(1)
Pseudomonas phage JBD69	NC 030908.1	YP 009273647.1	membrane protein	10135..10585(1)
Pseudomonas phage JBD93	NC 030918.1	YP 009274608.1	putative integral membrane protein	9601..10051(1)
Pseudomonas virus FHA0480	NC 041851.1	YP 009591706.1	membrane protein	9984..10434(1)
-------------
Pasteurella phage AFS-2018a	MH238466.1	AWY03232.1	hypothetical protein	6357..6864(1)
Curvibacter phage TJ1	MH766655.1	QDB70131.1	hypothetical protein	17172..17625(1)
Burkholderia phage KS10	NC 019455.1	YP 007002922.1	regulatory protein GemA	8393..8816(1)
Haemophilus phage SuMu	NC 028766.1	YP 009196063.1	regulatory protein GemA	7457..7883(1)
Mannheimia phage vB_Mh_ 3927_AP2	KT381864.1	ALF02074.1	protein of unknown function DUF1018	26898..27342(-1)
Thiobacimonas phage vB_ThpS-P1	KT381865.1	ALF02123.1	hypothetical protein	27160..27586(-1)
Pseudomonas phage vB_PaeS_PcyII-40 PfII40a	KU199707.1	AMD42514.1	hypothetical protein	8597..8999(1)
Pseudomonas phage vB_Pae_CF28a	LT608331.1	SCM61968.1	hypothetical protein	9200..9602(1)
Pseudomonas phage vB_Pae_BR327a	MK511018.1	QBI81140.1	hypothetical protein	9710..10118(1)
Pseudomonas virus DMS3	MK511036.1	QBI82191.1	hypothetical protein	9678..10086(1)
Pseudomonas virus MP22	NC 008717.1	YP 950442.1	regulatory protein GemA	9314..9722(1)
Pseudomonas virus MP38	NC 009818.1	YP 001469145.1	regulatory protein GemA	8679..9081(1)
Pseudomonas phage MP42	NC 011611.1	YP 002332330.1	hypothetical protein	9811..10219(1)
Pseudomonas phage JBD30	NC 018274.1	YP 006560516.1	hypothetical protein	9719..10127(1)
Pseudomonas phage JBD88a	NC 020198.1	YP 007392327.1	regulatory protein GemA	9758..10166(1)
Pseudomonas phage JBD24	NC 020200.1	YP 007392425.1	regulatory protein GemA	8668..9070(1)
Rhodobacter phage RC1	NC 020203.1	YP 007392782.1	regulatory protein GemA	9528..9936(1)
Rhodovulum phage RS1	NC 024782.1	YP 009055245.1	hypothetical protein	9169..9577(1)
Pseudomonas phage MP48	NC 026601.1	YP 009125659.1	regulatory protein GemA	9683..10091(1)
Pseudomonas phage vB_PaeS_PAO1_Ab30	NC 029107.1	YP 009226528.1	regulatory protein GemA	11324..11717(1)
Ralstonia phage RS138	NC 030908.1	YP 009273646.1	regulatory protein GemA	9741..10143(1)
Pseudomonas phage JBD69	NC 030918.1	YP 009274607.1	regulatory protein GemA	9207..9615(1)
Pseudomonas phage JBD93	NC 031059.1	YP 009285904.1	regulatory protein GemA	10328..10784(1)
Pseudomonas virus FHA0480	NC 041851.1	YP 009591705.1	regulatory protein GemA	9590..9992(1)
---- 23 ----
Phage name	Phage acc. no.	Protein acc. no.	Product	Protein location
Thiobacimonas phage vB_ThpS-P1	KT381864.1	ALF02053.1	hypothetical protein	14116..14548(-1)
Pelagibaca phage vB_PeaS-P1	KT381865.1	ALF02103.1	hypothetical protein	14448..14895(-1)
Pseudomonas phage JBD16C	KU199707.1	AMD42535.1	hypothetical protein	21741..22215(1)
Pseudomonas phage vB_PaeS_PcyII-40 PfII40a	LT608331.1	SCM62006.1	hypothetical protein	22376..22850(1)
Pseudomonas phage vB_Pae_CF28a	MK511018.1	QBI81164.1	hypothetical protein	22802..23276(1)
Pseudomonas phage vB_Pae_BR327a	MK511036.1	QBI82215.1	hypothetical protein	22770..23244(1)
Pseudomonas phage UMP151	MK934841.1	QDF15008.1	hypothetical protein	24072..24525(1)
Pseudomonas virus DMS3	NC 008717.1	YP 950461.1	hypothetical protein	22036..22510(1)
Pseudomonas virus MP22	NC 009818.1	YP 001469166.1	hypothetical protein	21750..22224(1)
Pseudomonas virus MP38	NC 011611.1	YP 002332349.1	hypothetical protein	22212..22686(1)
Pseudomonas phage MP42	NC 018274.1	YP 006560536.1	hypothetical protein	22468..22942(1)
Pseudomonas phage JBD30	NC 020198.1	YP 007392349.1	hypothetical protein	22507..22981(1)
Pseudomonas phage JBD88a	NC 020200.1	YP 007392448.1	hypothetical protein	21763..22237(1)
Pseudomonas phage JBD24	NC 020203.1	YP 007392807.1	hypothetical protein	22620..23094(1)
Rhodobacter phage RC1	NC 020839.1	YP 007673211.1	hypothetical protein	12450..12885(-1)
Rhodovulum phage RS1	NC 020866.1	YP 007676424.1	hypothetical protein	26882..27317(1)
Pseudomonas phage MP48	NC 024782.1	YP 009055264.1	hypothetical protein	22324..22798(1)
Pseudomonas phage vB_PaeS_PAO1_Ab30	NC 026601.1	YP 009125684.1	hypothetical protein	22775..23249(1)
Pseudomonas phage JBD69	NC 030908.1	YP 009273668.1	hypothetical protein	22490..22964(1)
Pseudomonas phage JBD93	NC 030918.1	YP 009274629.1	hypothetical protein	21965..22439(1)
Rhodovulum phage vB_RhkS_P1	NC 031059.1	YP 009285928.1	hypothetical protein	23155..23602(1)
Pseudomonas virus FHA0480	NC 041851.1	YP 009591726.1	hypothetical protein	22660..23134(1)
vB_SspS_MuM16-1	MZ568827	MuM16-1_p41	phage protein Mup37	25164..25608(1)
-------------
Escherichia virus Mu 3F6	LR595867.1	VUD37864.1	Ner-like regulatory protein	1198..1420(1)
Vibrio phage 1.028.O. 10N.286.45.B6	MG592412.1	AUR82785.1	winged helix-turn-helix DNA-binding protein	1183..1408(1)
Vibrio phage 1.136.O. 10N.261.45.E11	MG592507.1	AUR90006.1	winged helix-turn-helix DNA-binding protein	1183..1408(1)
Vibrio phage 1.142.O. 10N.261.49.E11	MG592513.1	AUR90324.1	winged helix-turn-helix DNA-binding protein	1183..1408(1)
Vibrio phage 1.156.O. 10N.261.45.A6	MG592524.1	AUR91120.1	winged helix-turn-helix DNA-binding protein	1183..1408(1)
Vibrio phage 1.159.O. 10N.261.46.F12	MG592527.1	AUR91301.1	winged helix-turn-helix DNA-binding protein	1183..1408(1)
Vibrio phage 1.217.O. 10N.261.45.A1	MG592588.1	AUR96199.1	winged helix-turn-helix DNA-binding protein	1183..1408(1)
Vibrio phage 1.219.O. 10N.261.45.E2	MG592589.1	AUR96249.1	winged helix-turn-helix DNA-binding protein	1183..1408(1)
Vibrio phage 2.159.A. 10N.261.46.F12	MG592669.1	AUS02483.1	winged helix-turn-helix DNA-binding protein	1183..1408(1)
Vibrio phage 2.159.B. 10N.261.46.F12	MG592670.1	AUS02533.1	winged helix-turn-helix DNA-binding protein	1183..1408(1)
Pasteurella phage AFS-2018a	MH238466.1	AWY03225.1	DNA-binding protein	1102..1369(1)
Yersinia phage vB_YpM 3	MT374852.1	QKE55323.1	hypothetical protein	1206..1434(1)
Yersinia phage vB_YpM 5	MT374853.1	QKE55387.1	hypothetical protein	5690..5927(1)
Yersinia phage vB_YpM 6	MT374854.1	QKE55439.1	hypothetical protein	4314..4551(1)
Yersinia phage vB_YpM 23	MT374856.1	QKE55532.1	hypothetical protein	5108..5336(1)
Yersinia phage vB_YpM_Tongde	MT591577.1	QMP18956.1	hypothetical protein	35838..36087(-1)
Escherichia phage Mu	NC 000929.1	NP 050606.1	helix-turn-helix domain-containing protein	1098..1326(1)
Escherichia phage D108	NC 013594.1	YP 003335750.1	helix-turn-helix domain-containing protein	1049..1271(1)
Haemophilus phage SuMu	NC 019455.1	YP 007002910.1	transcriptional regulator	1267..1537(1)
Vibrio phage martha 12B12	NC 021070.1	YP 007877549.1	helix-turn-helix domain-containing protein	31379..31610(-1)
Shigella phage SfMu	NC 027382.1	YP 009152188.1	helix-turn-helix domain-containing protein	1039..1261(1)
Mannheimia phage vB_Mh_ 3927_AP2	NC 028766.1	YP 009196051.1	helix-turn-helix domain-containing protein	1146..1374(1)
vB_SspM_MuM16-2	MZ568828	MuM16-2_p49	transcriptional regulator, Ner family	32569..32794(-1)
-------------
Alteromonadaceae phage B23	KY939598.1	AVI04959.1	tail/DNA circulation protein	27247..28411(1)
Escherichia virus Mu 3F6	LR595867.1	VUD37904.1	Phage tail/DNA circulation protein	26415..27903(1)
Vibrio phage 1.028.O. 10N.286.45.B6	MG592412.1	AUR82826.1	DNA circulation	25411..26731(1)
Vibrio phage 1.136.O. 10N.261.45.E11	MG592507.1	AUR90047.1	hypothetical protein	25411..26731(1)
Vibrio phage 1.142.O. 10N.261.49.E11	MG592513.1	AUR90365.1	DNA circulation	25411..26731(1)
Vibrio phage 1.156.O. 10N.261.45.A6	MG592524.1	AUR91161.1	DNA circulation	25411..26731(1)
Vibrio phage 1.159.O. 10N.261.46.F12	MG592527.1	AUR91342.1	DNA circulation	25411..26731(1)
Vibrio phage 1.217.O. 10N.261.45.A1	MG592588.1	AUR96240.1	DNA circulation	25411..26731(1)
Vibrio phage 1.219.O. 10N.261.45.E2	MG592589.1	AUR96290.1	DNA circulation	25411..26731(1)
Vibrio phage 2.159.A. 10N.261.46.F12	MG592669.1	AUS02524.1	DNA circulation	25411..26731(1)
Vibrio phage 2.159.B. 10N.261.46.F12	MG592670.1	AUS02574.1	DNA circulation	25411..26731(1)
Curvibacter phage TJ1	MH766655.1	QDB70146.1	tail/DNA circulation protein	28306..29623(1)
Yersinia phage vB_YpM 3	MT374852.1	QKE55362.1	hypothetical protein	26066..27554(1)
Yersinia phage vB_YpM 5	MT374853.1	QKE55427.1	hypothetical protein	31413..32901(1)
Yersinia phage vB_YpM 6	MT374854.1	QKE55479.1	hypothetical protein	30037..31525(1)
Yersinia phage vB_YpM 23	MT374856.1	QKE55571.1	hypothetical protein	29968..31456(1)
Yersinia phage vB_YpM_Tongde	MT591577.1	QMP18917.1	hypothetical protein	9281..10769(-1)
Escherichia phage Mu	NC 000929.1	NP 050647.1	DNA circularization protein	26207..27695(1)
Burkholderia phage KS10	NC 011216.1	YP 002221457.1	DNA circularization N-terminal domain-containing protein	28037..29408(1)
Escherichia phage D108	NC 013594.1	YP 003335792.1	DNA circularization protein	26256..27744(1)
Vibrio phage martha 12B12	NC 021070.1	YP 007877508.1	DNA circulation protein	5663..6983(-1)
Shigella phage SfMu	NC 027382.1	YP 009152229.1	DNA circulation protein	26625..28113(1)
vB_SspM_MuM16-2	MZ568828	MuM16-2_p07	Phage tail/DNA circulation protein	5678..6995(-1)
---- 22 ----
Phage name	Phage acc. no.	Protein acc. no.	Product	Protein location
Thiobacimonas phage vB_ThpS-P1	KT381864.1	ALF02081.1	hypothetical protein	29759..30530(-1)
Pelagibaca phage vB_PeaS-P1	KT381865.1	ALF02133.1	DNA transposition protein	31180..31933(-1)
Pseudomonas phage JBD16C	KU199707.1	AMD42502.1	DNA transposition protein	4043..4814(1)
Pseudomonas phage vB_PaeS_PcyII-40 PfII40a	LT608331.1	SCM61943.1	DNA transposition protein	4146..4899(1)
Pseudomonas phage vB_Pae_CF28a	MK511018.1	QBI81127.1	hypothetical protein	4732..5485(1)
Pseudomonas phage vB_Pae_BR327a	MK511036.1	QBI82178.1	hypothetical protein	4700..5453(1)
Pseudomonas virus DMS3	NC 008717.1	YP 950429.1	putative B protein	4150..4903(1)
Pseudomonas virus MP22	NC 009818.1	YP 001469135.1	ATP-binding protein	4127..4898(1)
Pseudomonas virus MP38	NC 011611.1	YP 002332319.1	DNA transposition protein	4654..5425(1)
Pseudomonas phage MP42	NC 018274.1	YP 006560504.1	DNA transposition protein	4617..5388(1)
Pseudomonas phage JBD30	NC 020198.1	YP 007392314.1	hypothetical protein	4673..5426(1)
Pseudomonas phage JBD88a	NC 020200.1	YP 007392413.1	hypothetical protein	4132..4885(1)
Pseudomonas phage JBD24	NC 020203.1	YP 007392769.1	hypothetical protein	4400..5153(1)
Rhodobacter phage RC1	NC 020839.1	YP 007673247.1	hypothetical protein	33838..34579(-1)
Rhodovulum phage RS1	NC 020866.1	YP 007676388.1	transposase	5190..5931(1)
Pseudomonas phage MP48	NC 024782.1	YP 009055235.1	DNA transposition protein	4617..5388(1)
Pseudomonas phage vB_PaeS_PAO1_Ab30	NC 026601.1	YP 009125646.1	putative DNA transposition protein	4705..5458(1)
Pseudomonas phage JBD69	NC 030908.1	YP 009273632.1	DNA transposition protein	4635..5385(1)
Pseudomonas phage JBD93	NC 030918.1	YP 009274594.1	DNA transposition protein	4133..4886(1)
Rhodovulum phage vB_RhkS_P1	NC 031059.1	YP 009285896.1	ATP-binding protein	7032..7779(1)
Pseudomonas virus FHA0480	NC 041851.1	YP 009591691.1	ATPase, AAA family	4137..4890(1)
vB_SspS_MuM16-1	MZ568827	MuM16-1_p05	phage replication initiation ATPase, Mup04	3541..4261(1)
---- 21 ----
Phage name	Phage acc. no.	Protein acc. no.	Product	Protein location
Escherichia virus Mu 3F6	LR595867.1	VUD37877.1	FIG00638221: hypothetical protein	8440..8992(1)
Vibrio phage 1.028.O. 10N.286.45.B6	MG592412.1	AUR82799.1	hypothetical protein	7421..7937(1)
Vibrio phage 1.136.O. 10N.261.45.E11	MG592507.1	AUR90020.1	C4 DksA/TraR-type zinc finger protein	7421..7937(1)
Vibrio phage 1.142.O. 10N.261.49.E11	MG592513.1	AUR90338.1	hypothetical protein	7421..7937(1)
Vibrio phage 1.156.O. 10N.261.45.A6	MG592524.1	AUR91134.1	hypothetical protein	7421..7937(1)
Vibrio phage 1.159.O. 10N.261.46.F12	MG592527.1	AUR91315.1	hypothetical protein	7421..7937(1)
Vibrio phage 1.217.O. 10N.261.45.A1	MG592588.1	AUR96213.1	hypothetical protein	7421..7937(1)
Vibrio phage 1.219.O. 10N.261.45.E2	MG592589.1	AUR96263.1	hypothetical protein	7421..7937(1)
Vibrio phage 2.159.A. 10N.261.46.F12	MG592669.1	AUS02497.1	hypothetical protein	7421..7937(1)
Vibrio phage 2.159.B. 10N.261.46.F12	MG592670.1	AUS02547.1	hypothetical protein	7421..7937(1)
Yersinia phage vB_YpM 3	MT374852.1	QKE55337.1	hypothetical protein	8463..9015(1)
Yersinia phage vB_YpM 5	MT374853.1	QKE55402.1	hypothetical protein	13252..13804(1)
Yersinia phage vB_YpM 6	MT374854.1	QKE55454.1	hypothetical protein	11876..12428(1)
Yersinia phage vB_YpM 23	MT374856.1	QKE55546.1	hypothetical protein	12365..12917(1)
Yersinia phage vB_YpM_Tongde	MT591577.1	QMP18942.1	hypothetical protein	28247..28799(-1)
Escherichia phage Mu	NC 000929.1	NP 050620.1	regulatory protein GemA	8232..8784(1)
Escherichia phage D108	NC 013594.1	YP 003335763.1	hypothetical protein	8281..8833(1)
Vibrio phage martha 12B12	NC 021070.1	YP 007877535.1	hypothetical protein	24611..25130(-1)
Shigella phage SfMu	NC 027382.1	YP 009152203.1	regulatory protein GemA	9022..9574(1)
vB_SspM_MuM16-2	MZ568828	MuM16-2_p34	hypothetical protein	24662..25202(-1)
vB_SspS_MuM16-1	MZ568827	MuM16-1_p12	regulatory protein Gem A, Mup16	6853..7474(1)
-------------
Curvibacter phage TJ1	MH766655.1	QDB70110.1	DNA-binding protein	5507..6017(-1)
Burkholderia phage KS10	NC 011216.1	YP 002221421.1	DUF1804 family protein	4890..5388(-1)
Haemophilus phage SuMu	NC 019455.1	YP 007002932.1	DUF1804 family protein	12056..12566(1)
Mannheimia phage vB_Mh_ 3927_AP2	NC 028766.1	YP 009196074.1	DUF1804 family protein	11471..11972(1)
Pseudomonas phage JBD16C	KU199707.1	AMD42521.1	DNA-binding protein	11718..12219(1)
Pseudomonas phage vB_PaeS_PcyII-40 PfII40a	LT608331.1	SCM61982.1	DNA-binding protein	12273..12774(1)
Pseudomonas phage vB_Pae_CF28a	MK511018.1	QBI81149.1	hypothetical protein	12782..13283(1)
Pseudomonas phage vB_Pae_BR327a	MK511036.1	QBI82200.1	hypothetical protein	12750..13251(1)
Pseudomonas virus DMS3	NC 008717.1	YP 950448.1	DUF1804 family protein	12262..12763(1)
Pseudomonas virus MP22	NC 009818.1	YP 001469153.1	DUF1804 family protein	11752..12253(1)
Pseudomonas virus MP38	NC 011611.1	YP 002332338.1	hypothetical protein	12883..13384(1)
Pseudomonas phage MP42	NC 018274.1	YP 006560523.1	hypothetical protein	12667..13168(1)
Pseudomonas phage JBD30	NC 020198.1	YP 007392336.1	DUF1804 family protein	12706..13207(1)
Pseudomonas phage JBD88a	NC 020200.1	YP 007392434.1	DUF1804 family protein	11741..12242(1)
Pseudomonas phage JBD24	NC 020203.1	YP 007392791.1	DUF1804 family protein	12600..13101(1)
Pseudomonas phage MP48	NC 024782.1	YP 009055252.1	hypothetical protein	12241..12742(1)
Pseudomonas phage vB_PaeS_PAO1_Ab30	NC 026601.1	YP 009125668.1	DUF1804 family protein	12755..13256(1)
Ralstonia phage RS138	NC 029107.1	YP 009226535.1	DUF1804 family protein	14024..14525(1)
Pseudomonas phage JBD69	NC 030908.1	YP 009273655.1	DUF1804 family protein	12689..13190(1)
Pseudomonas phage JBD93	NC 030918.1	YP 009274616.1	DUF1804 family protein	12279..12780(1)
Pseudomonas virus FHA0480	NC 041851.1	YP 009591713.1	DUF1804 family protein	12662..13163(1)
-------------
Alteromonadaceae phage B23	KY939598.1	AVI04962.1	hypothetical protein	30309..30759(1)
Escherichia virus Mu 3F6	LR595867.1	VUD37907.1	Bacteriophage protein GP46	29612..30050(1)
Vibrio phage 1.028.O. 10N.286.45.B6	MG592412.1	AUR82829.1	hypothetical protein	28441..28912(1)
Vibrio phage 1.136.O. 10N.261.45.E11	MG592507.1	AUR90050.1	hypothetical protein	28441..28912(1)
Vibrio phage 1.142.O. 10N.261.49.E11	MG592513.1	AUR90368.1	hypothetical protein	28441..28912(1)
Vibrio phage 1.156.O. 10N.261.45.A6	MG592524.1	AUR91164.1	hypothetical protein	28441..28912(1)
Vibrio phage 1.159.O. 10N.261.46.F12	MG592527.1	AUR91345.1	hypothetical protein	28441..28912(1)
Vibrio phage 1.217.O. 10N.261.45.A1	MG592588.1	AUR96243.1	hypothetical protein	28441..28912(1)
Vibrio phage 1.219.O. 10N.261.45.E2	MG592589.1	AUR96293.1	hypothetical protein	28441..28912(1)
Vibrio phage 2.159.A. 10N.261.46.F12	MG592669.1	AUS02527.1	hypothetical protein	28441..28912(1)
Vibrio phage 2.159.B. 10N.261.46.F12	MG592670.1	AUS02577.1	hypothetical protein	28441..28912(1)
Yersinia phage vB_YpM 3	MT374852.1	QKE55365.1	hypothetical protein	29263..29701(1)
Yersinia phage vB_YpM 5	MT374853.1	QKE55430.1	hypothetical protein	34610..35048(1)
Yersinia phage vB_YpM 6	MT374854.1	QKE55482.1	hypothetical protein	33234..33672(1)
Yersinia phage vB_YpM 23	MT374856.1	QKE55574.1	hypothetical protein	33165..33603(1)
Yersinia phage vB_YpM_Tongde	MT591577.1	QMP18914.1	hypothetical protein	7134..7572(-1)
Escherichia phage Mu	NC 000929.1	NP 050650.1	GP46 family protein	29404..29842(1)
Escherichia phage D108	NC 013594.1	YP 003335795.1	GP46 family protein	29453..29891(1)
Vibrio phage martha 12B12	NC 021070.1	YP 007877505.1	hypothetical protein	3537..3987(-1)
Shigella phage SfMu	NC 027382.1	YP 009152232.1	GP46 family protein	29816..30254(1)
vB_SspM_MuM16-2	MZ568828	MuM16-2_p04	Bacteriophage protein GP46	3495..3948(-1)
-------------
Alteromonadaceae phage B23	KY939598.1	AVI04955.1	hypothetical protein	23976..24330(1)
Escherichia virus Mu 3F6	LR595867.1	VUD37901.1	Phage tail tube protein	23393..23750(1)
Vibrio phage 1.028.O. 10N.286.45.B6	MG592412.1	AUR82823.1	tail tube protein	22930..23284(1)
Vibrio phage 1.136.O. 10N.261.45.E11	MG592507.1	AUR90044.1	tail tube protein	22930..23284(1)
Vibrio phage 1.142.O. 10N.261.49.E11	MG592513.1	AUR90362.1	tail tube protein	22930..23284(1)
Vibrio phage 1.156.O. 10N.261.45.A6	MG592524.1	AUR91158.1	tail tube protein	22930..23284(1)
Vibrio phage 1.159.O. 10N.261.46.F12	MG592527.1	AUR91339.1	tail tube protein	22930..23284(1)
Vibrio phage 1.217.O. 10N.261.45.A1	MG592588.1	AUR96237.1	tail tube protein	22930..23284(1)
Vibrio phage 1.219.O. 10N.261.45.E2	MG592589.1	AUR96287.1	tail tube protein	22930..23284(1)
Vibrio phage 2.159.A. 10N.261.46.F12	MG592669.1	AUS02521.1	tail tube protein	22930..23284(1)
Vibrio phage 2.159.B. 10N.261.46.F12	MG592670.1	AUS02571.1	tail tube protein	22930..23284(1)
Yersinia phage vB_YpM 3	MT374852.1	QKE55359.1	hypothetical protein	23044..23401(1)
Yersinia phage vB_YpM 5	MT374853.1	QKE55424.1	hypothetical protein	28391..28748(1)
Yersinia phage vB_YpM 6	MT374854.1	QKE55476.1	hypothetical protein	27015..27372(1)
Yersinia phage vB_YpM 23	MT374856.1	QKE55568.1	hypothetical protein	26946..27303(1)
Yersinia phage vB_YpM_Tongde	MT591577.1	QMP18920.1	hypothetical protein	13434..13791(-1)
Escherichia phage Mu	NC 000929.1	NP 050644.1	tail tube protein	23185..23542(1)
Escherichia phage D108	NC 013594.1	YP 003335788.1	tail tube protein	23234..23591(1)
Vibrio phage martha 12B12	NC 021070.1	YP 007877511.1	tail tube protein	9206..9560(-1)
Shigella phage SfMu	NC 027382.1	YP 009152226.1	tail tube protein	23603..23960(1)
vB_SspM_MuM16-2	MZ568828	MuM16-2_p10	Phage tail tube protein	9225..9582(-1)
-------------
Curvibacter phage TJ1	MH766655.1	QDB70109.1	hypothetical protein	3915..5508(-1)
Burkholderia phage KS10	NC 011216.1	YP 002221420.1	terminase large subunit	3267..4884(-1)
Haemophilus phage SuMu	NC 019455.1	YP 007002934.1	terminase	12620..14285(1)
Mannheimia phage vB_Mh_ 3927_AP2	NC 028766.1	YP 009196076.1	terminase large subunit	12121..13747(1)
Pseudomonas phage JBD16C	KU199707.1	AMD42522.1	hypothetical protein	12215..13991(1)
Pseudomonas phage vB_PaeS_PcyII-40 PfII40a	LT608331.1	SCM61986.1	hypothetical protein	13310..14963(1)
Pseudomonas phage vB_Pae_CF28a	MK511018.1	QBI81151.1	hypothetical protein	13769..15422(1)
Pseudomonas phage vB_Pae_BR327a	MK511036.1	QBI82202.1	hypothetical protein	13737..15390(1)
Pseudomonas virus DMS3	NC 008717.1	YP 950450.1	terminase large subunit	13294..14947(1)
Pseudomonas virus MP22	NC 009818.1	YP 001469154.1	hypothetical protein	12249..14025(1)
Pseudomonas virus MP38	NC 011611.1	YP 002332340.1	hypothetical protein	13915..15568(1)
Pseudomonas phage MP42	NC 018274.1	YP 006560525.1	phage uncharacterized protein	13699..15352(1)
Pseudomonas phage JBD30	NC 020198.1	YP 007392338.1	terminase large subunit	13738..15391(1)
Pseudomonas phage JBD88a	NC 020200.1	YP 007392435.1	hypothetical protein	12238..14014(1)
Pseudomonas phage JBD24	NC 020203.1	YP 007392794.1	terminase large subunit	13587..15240(1)
Pseudomonas phage MP48	NC 024782.1	YP 009055253.1	hypothetical protein	12738..14514(1)
Pseudomonas phage vB_PaeS_PAO1_Ab30	NC 026601.1	YP 009125671.1	terminase large subunit	13742..15395(1)
Ralstonia phage RS138	NC 029107.1	YP 009226536.1	hypothetical protein	14517..16296(1)
Pseudomonas phage JBD69	NC 030908.1	YP 009273657.1	terminase large subunit	13721..15374(1)
Pseudomonas phage JBD93	NC 030918.1	YP 009274617.1	hypothetical protein	12776..14552(1)
Pseudomonas virus FHA0480	NC 041851.1	YP 009591714.1	hypothetical protein	13159..14935(1)
-------------
Escherichia virus Mu 3F6	LR595867.1	VUD37872.1	Mu Gam, dsDNA end binding protein	5909..6434(1)
Pasteurella phage AFS-2018a	MH238466.1	AWY03228.1	host-nuclease inhibitor protein	4554..5073(1)
Yersinia phage vB_YpM 3	MT374852.1	QKE55331.1	hypothetical protein	5908..6433(1)
Yersinia phage vB_YpM 5	MT374853.1	QKE55395.1	hypothetical protein	10516..11041(1)
Yersinia phage vB_YpM 6	MT374854.1	QKE55447.1	hypothetical protein	9140..9665(1)
Yersinia phage vB_YpM 23	MT374856.1	QKE55540.1	hypothetical protein	9810..10335(1)
Yersinia phage vB_YpM_Tongde	MT591577.1	QMP18948.1	hypothetical protein	30748..31273(-1)
Escherichia phage Mu	NC 000929.1	NP 050614.1	host-nuclease inhibitor Gam family protein	5800..6325(1)
Escherichia phage D108	NC 013594.1	YP 003335758.1	host-nuclease inhibitor Gam family protein	5760..6285(1)
Vibrio phage martha 12B12	NC 019455.1	YP 007002916.1	host-nuclease inhibitor Gam family protein	5425..5947(1)
Shigella phage SfMu	NC 027382.1	YP 009152196.1	host-nuclease inhibitor Gam family protein	5737..6262(1)
Pseudomonas phage JBD16C	KU199707.1	AMD42507.1	putative host-nuclease inhibitor protein	6262..6781(1)
Pseudomonas phage vB_PaeS_PcyII-40 PfII40a	LT608331.1	SCM61955.1	Mu-like prophage FluMu host-nuclease inhibitor protein gam	6961..7480(1)
Pseudomonas virus DMS3	NC 008717.1	YP 950435.1	host-nuclease inhibitor Gam family protein	7076..7595(1)
Pseudomonas phage MP42	NC 018274.1	YP 006560510.1	host nuclease inhibitor protein	7561..8080(1)
Pseudomonas phage JBD30	NC 020198.1	YP 007392320.1	host-nuclease inhibitor Gam family protein	7599..8118(1)
Pseudomonas phage JBD88a	NC 020200.1	YP 007392418.1	host-nuclease inhibitor Gam family protein	6333..6852(1)
Pseudomonas phage JBD24	NC 020203.1	YP 007392774.1	host-nuclease inhibitor Gam family protein	6601..7120(1)
Pseudomonas phage JBD69	NC 030908.1	YP 009273637.1	host-nuclease inhibitor Gam family protein	6833..7352(1)
Pseudomonas phage JBD93	NC 030918.1	YP 009274600.1	host-nuclease inhibitor Gam family protein	7059..7578(1)
Pseudomonas virus FHA0480	NC 041851.1	YP 009591697.1	host-nuclease inhibitor Gam family protein	7063..7582(1)
---- 20 ----
Phage name	Phage acc. no.	Protein acc. no.	Product	Protein location
Pelagibaca phage vB_PeaS-P1	KT381865.1	ALF02132.1	hypothetical protein	30590..31181(-1)
Pseudomonas phage JBD16C	KU199707.1	AMD42503.1	hypothetical protein	4810..5458(1)
Pseudomonas phage vB_PaeS_PcyII-40 PfII40a	LT608331.1	SCM61945.1	hypothetical protein	4895..5531(1)
Pseudomonas phage vB_Pae_CF28a	MK511018.1	QBI81128.1	hypothetical protein	5481..6147(1)
Pseudomonas phage vB_Pae_BR327a	MK511036.1	QBI82179.1	hypothetical protein	5449..6115(1)
Pseudomonas virus DMS3	NC 008717.1	YP 950430.1	hypothetical protein	4899..5565(1)
Pseudomonas virus MP22	NC 009818.1	YP 001469136.1	hypothetical protein	4894..5542(1)
Pseudomonas virus MP38	NC 011611.1	YP 002332320.1	hypothetical protein	5421..6087(1)
Pseudomonas phage MP42	NC 018274.1	YP 006560505.1	hypothetical protein	5384..6050(1)
Pseudomonas phage JBD30	NC 020198.1	YP 007392315.1	hypothetical protein	5422..6088(1)
Pseudomonas phage JBD88a	NC 020200.1	YP 007392414.1	hypothetical protein	4881..5529(1)
Pseudomonas phage JBD24	NC 020203.1	YP 007392770.1	hypothetical protein	5149..5797(1)
Rhodobacter phage RC1	NC 020839.1	YP 007673246.1	hypothetical protein	33239..33896(-1)
Rhodovulum phage RS1	NC 020866.1	YP 007676389.1	hypothetical protein	5873..6530(1)
Pseudomonas phage MP48	NC 024782.1	YP 009055236.1	hypothetical protein	5384..6032(1)
Pseudomonas phage vB_PaeS_PAO1_Ab30	NC 026601.1	YP 009125647.1	hypothetical protein	5454..6120(1)
Pseudomonas phage JBD69	NC 030908.1	YP 009273633.1	hypothetical protein	5381..6029(1)
Pseudomonas phage JBD93	NC 030918.1	YP 009274595.1	hypothetical protein	4882..5548(1)
Rhodovulum phage vB_RhkS_P1	NC 031059.1	YP 009285897.1	hypothetical protein	7775..8357(1)
Pseudomonas virus FHA0480	NC 041851.1	YP 009591692.1	hypothetical protein	4886..5552(1)
---- 18 ----
Phage name	Phage acc. no.	Protein acc. no.	Product	Protein location
Pseudomonas phage JBD16C	KU199707.1	AMD42537.1	hypothetical protein	22413..23187(1)
Pseudomonas phage vB_PaeS_PcyII-40 PfII40a	LT608331.1	SCM62010.1	hypothetical protein	23048..23822(1)
Pseudomonas phage vB_Pae_CF28a	MK511018.1	QBI81166.1	hypothetical protein	23475..24246(1)
Pseudomonas phage vB_Pae_BR327a	MK511036.1	QBI82217.1	hypothetical protein	23443..24214(1)
Pseudomonas phage UMP151	MK934841.1	QDF15010.1	putative tail sheath protein	24731..25472(1)
Pseudomonas virus DMS3	NC 008717.1	YP 950463.1	hypothetical protein	22709..23480(1)
Pseudomonas virus MP22	NC 009818.1	YP 001469168.1	hypothetical protein	22422..23196(1)
Pseudomonas virus MP38	NC 011611.1	YP 002332351.1	hypothetical protein	22885..23656(1)
Pseudomonas phage MP42	NC 018274.1	YP 006560538.1	hypothetical protein	23141..23912(1)
Pseudomonas phage JBD30	NC 020198.1	YP 007392351.1	hypothetical protein	23180..23951(1)
Pseudomonas phage JBD88a	NC 020200.1	YP 007392450.1	hypothetical protein	22435..23209(1)
Pseudomonas phage JBD24	NC 020203.1	YP 007392809.1	hypothetical protein	23293..24064(1)
Pseudomonas phage MP48	NC 024782.1	YP 009055266.1	hypothetical protein	22997..23768(1)
Pseudomonas phage vB_PaeS_PAO1_Ab30	NC 026601.1	YP 009125686.1	hypothetical protein	23448..24219(1)
Ralstonia phage RS138	NC 029107.1	YP 009226548.1	hypothetical protein	24662..25412(1)
Pseudomonas phage JBD69	NC 030908.1	YP 009273670.1	hypothetical protein	23163..23934(1)
Pseudomonas phage JBD93	NC 030918.1	YP 009274631.1	hypothetical protein	22637..23411(1)
Pseudomonas virus FHA0480	NC 041851.1	YP 009591728.1	hypothetical protein	23332..24106(1)
-------------
Pseudomonas phage JBD16C	KU199707.1	AMD42510.1	hypothetical protein	7472..7754(1)
Pseudomonas phage vB_PaeS_PcyII-40 PfII40a	LT608331.1	SCM61957.1	Host nuclease inhibitor protein	7481..7763(1)
Pseudomonas phage vB_PaeS_PcyII-40 PfII40a	LT608331.1	SCM61961.1	hypothetical protein	8075..8357(1)
Pseudomonas phage vB_Pae_CF28a	MK511018.1	QBI81135.1	hypothetical protein	8585..8867(1)
Pseudomonas phage vB_Pae_BR327a	MK511036.1	QBI82186.1	hypothetical protein	8553..8835(1)
Pseudomonas virus DMS3	NC 008717.1	YP 950436.1	hypothetical protein	7596..7878(1)
Pseudomonas virus DMS3	NC 008717.1	YP 950438.1	hypothetical protein	8189..8471(1)
Pseudomonas phage JBD30	NC 020198.1	YP 007392323.1	hypothetical protein	8633..8915(1)
Pseudomonas phage JBD88a	NC 020200.1	YP 007392421.1	hypothetical protein	7543..7825(1)
Pseudomonas phage JBD24	NC 020203.1	YP 007392775.1	hypothetical protein	7121..7403(1)
Pseudomonas phage JBD24	NC 020203.1	YP 007392777.1	hypothetical protein	7715..7997(1)
Pseudomonas phage vB_PaeS_PAO1_Ab30	NC 026601.1	YP 009125654.1	hypothetical protein	8558..8840(1)
Pseudomonas phage JBD69	NC 030908.1	YP 009273639.1	host nuclease inhibitor protein	7732..8011(1)
Pseudomonas phage JBD69	NC 030908.1	YP 009273641.1	hypothetical protein	8235..8517(1)
Pseudomonas phage JBD93	NC 030918.1	YP 009274601.1	host nuclease inhibitor protein	7579..7858(1)
Pseudomonas phage JBD93	NC 030918.1	YP 009274603.1	hypothetical protein	8082..8364(1)
Pseudomonas virus FHA0480	NC 041851.1	YP 009591699.1	hypothetical protein	7962..8241(1)
Pseudomonas virus FHA0480	NC 041851.1	YP 009591701.1	hypothetical protein	8465..8747(1)
---- 17 ----
Phage name	Phage acc. no.	Protein acc. no.	Product	Protein location
Pseudomonas phage JBD16C	KU199707.1	AMD42517.1	capsid and scaffold protein	10330..10747(1)
Pseudomonas phage vB_PaeS_PcyII-40 PfII40a	LT608331.1	SCM61975.1	hypothetical protein	10909..11326(1)
Pseudomonas phage vB_Pae_CF28a	MK511018.1	QBI81144.1	capsid and scaffold protein	11418..11835(1)
Pseudomonas phage vB_Pae_BR327a	MK511036.1	QBI82195.1	capsid and scaffold protein	11386..11803(1)
Pseudomonas virus DMS3	NC 008717.1	YP 950445.1	structural protein	11022..11439(1)
Pseudomonas virus MP22	NC 009818.1	YP 001469149.1	structural protein	10388..10805(1)
Pseudomonas virus MP38	NC 011611.1	YP 002332334.1	virion protein	11519..11936(1)
Pseudomonas phage MP42	NC 018274.1	YP 006560520.1	putative structural protein	11427..11844(1)
Pseudomonas phage JBD30	NC 020198.1	YP 007392331.1	structural protein	11466..11883(1)
Pseudomonas phage JBD88a	NC 020200.1	YP 007392429.1	structural protein	10377..10794(1)
Pseudomonas phage JBD24	NC 020203.1	YP 007392786.1	structural protein	11236..11653(1)
Pseudomonas phage MP48	NC 024782.1	YP 009055249.1	putative structural protein	10877..11294(1)
Pseudomonas phage vB_PaeS_PAO1_Ab30	NC 026601.1	YP 009125663.1	structural protein	11391..11808(1)
Ralstonia phage RS138	NC 029107.1	YP 009226530.1	structural protein	12314..12755(1)
Pseudomonas phage JBD69	NC 030908.1	YP 009273650.1	structural protein	11449..11866(1)
Pseudomonas phage JBD93	NC 030918.1	YP 009274611.1	structural protein	10915..11332(1)
Pseudomonas virus FHA0480	NC 041851.1	YP 009591708.1	structural protein P5	11298..11715(1)
-------------
Pseudomonas phage JBD16C	KU199707.1	AMD42543.1	hypothetical protein	31113..31935(1)
Pseudomonas phage vB_PaeS_PcyII-40 PfII40a	LT608331.1	SCM62021.1	hypothetical protein	31729..32551(1)
Pseudomonas phage vB_Pae_CF28a	MK511018.1	QBI81172.1	hypothetical protein	31955..32777(1)
Pseudomonas phage vB_Pae_BR327a	MK511036.1	QBI82223.1	hypothetical protein	31923..32745(1)
Pseudomonas phage UMP151	MK934841.1	QDF15017.1	FAD/FMN-containing dehydrogenase	33429..34248(1)
Pseudomonas virus DMS3	NC 008717.1	YP 950469.1	BR0599 family protein	31189..32011(1)
Pseudomonas virus MP22	NC 009818.1	YP 001469175.1	BR0599 family protein	31148..31925(1)
Pseudomonas virus MP38	NC 011611.1	YP 002332358.1	hypothetical protein	31630..32407(1)
Pseudomonas phage MP42	NC 018274.1	YP 006560544.1	hypothetical protein	31661..32438(1)
Pseudomonas phage JBD30	NC 020198.1	YP 007392357.1	BR0599 family protein	31655..32477(1)
Pseudomonas phage JBD88a	NC 020200.1	YP 007392456.1	BR0599 family protein	31121..31943(1)
Pseudomonas phage JBD24	NC 020203.1	YP 007392815.1	BR0599 family protein	31773..32595(1)
Pseudomonas phage MP48	NC 024782.1	YP 009055273.1	hypothetical protein	31574..32351(1)
Pseudomonas phage vB_PaeS_PAO1_Ab30	NC 026601.1	YP 009125692.1	putative FAD/FMN-containing dehydrogenase	31928..32750(1)
Pseudomonas phage JBD69	NC 030908.1	YP 009273676.1	hypothetical protein	31638..32460(1)
Pseudomonas phage JBD93	NC 030918.1	YP 009274637.1	BR0599 family protein	31318..32140(1)
Pseudomonas virus FHA0480	NC 041851.1	YP 009591734.1	BR0599 family protein	32013..32835(1)
-------------
Pseudomonas phage JBD16C	KU199707.1	AMD42540.1	hypothetical protein	27539..28496(1)
Pseudomonas phage vB_PaeS_PcyII-40 PfII40a	LT608331.1	SCM62016.1	hypothetical protein	28155..29112(1)
Pseudomonas phage vB_Pae_CF28a	MK511018.1	QBI81169.1	hypothetical protein	28381..29338(1)
Pseudomonas phage vB_Pae_BR327a	MK511036.1	QBI82220.1	hypothetical protein	28349..29306(1)
Pseudomonas phage UMP151	MK934841.1	QDF15014.1	viral structural protein	29851..30808(1)
Pseudomonas virus DMS3	NC 008717.1	YP 950466.1	hypothetical protein	27615..28572(1)
Pseudomonas virus MP22	NC 009818.1	YP 001469172.1	hypothetical protein	27529..28486(1)
Pseudomonas virus MP38	NC 011611.1	YP 002332355.1	hypothetical protein	28011..28968(1)
Pseudomonas phage MP42	NC 018274.1	YP 006560542.1	hypothetical protein	28042..28999(1)
Pseudomonas phage JBD30	NC 020198.1	YP 007392354.1	hypothetical protein	28081..29038(1)
Pseudomonas phage JBD88a	NC 020200.1	YP 007392453.1	hypothetical protein	27547..28504(1)
Pseudomonas phage JBD24	NC 020203.1	YP 007392812.1	hypothetical protein	28199..29156(1)
Pseudomonas phage MP48	NC 024782.1	YP 009055270.1	hypothetical protein	27955..28912(1)
Pseudomonas phage vB_PaeS_PAO1_Ab30	NC 026601.1	YP 009125689.1	hypothetical protein	28354..29311(1)
Pseudomonas phage JBD69	NC 030908.1	YP 009273673.1	hypothetical protein	28064..29021(1)
Pseudomonas phage JBD93	NC 030918.1	YP 009274634.1	hypothetical protein	27744..28701(1)
Pseudomonas virus FHA0480	NC 041851.1	YP 009591731.1	hypothetical protein	28439..29396(1)
-------------
Ochrobactrum phage POA1180	KX669658.1	AOT25348.1	hypothetical protein	31983..32448(1)
Pseudomonas phage JBD16C	KU199707.1	AMD42499.1	hypothetical protein	1338..1773(1)
Pseudomonas phage vB_PaeS_PcyII-40 PfII40a	LT608331.1	SCM61937.1	hypothetical protein	1423..1858(1)
Pseudomonas phage vB_Pae_CF28a	MK511018.1	QBI81123.1	hypothetical protein	1488..1923(1)
Pseudomonas phage vB_Pae_BR327a	MK511036.1	QBI82174.1	hypothetical protein	1456..1891(1)
Pseudomonas virus DMS3	NC 008717.1	YP 950426.1	hypothetical protein	1427..1862(1)
Pseudomonas virus MP22	NC 009818.1	YP 001469132.1	hypothetical protein	1422..1857(1)
Pseudomonas virus MP38	NC 011611.1	YP 002332315.1	hypothetical protein	1428..1863(1)
Pseudomonas phage MP42	NC 018274.1	YP 006560500.1	hypothetical protein	1388..1823(1)
Pseudomonas phage JBD30	NC 020198.1	YP 007392310.1	hypothetical protein	1429..1864(1)
Pseudomonas phage JBD88a	NC 020200.1	YP 007392410.1	hypothetical protein	1412..1847(1)
Pseudomonas phage JBD24	NC 020203.1	YP 007392766.1	hypothetical protein	1458..1893(1)
Pseudomonas phage MP48	NC 024782.1	YP 009055231.1	hypothetical protein	1388..1823(1)
Pseudomonas phage vB_PaeS_PAO1_Ab30	NC 026601.1	YP 009125642.1	hypothetical protein	1461..1896(1)
Pseudomonas phage JBD69	NC 030908.1	YP 009273628.1	hypothetical protein	1388..1823(1)
Pseudomonas phage JBD93	NC 030918.1	YP 009274591.1	hypothetical protein	1413..1848(1)
Pseudomonas virus FHA0480	NC 041851.1	YP 009591688.1	hypothetical protein	1417..1852(1)
-------------
Pseudomonas phage JBD16C	KU199707.1	AMD42545.1	hypothetical protein	32185..32398(1)
Pseudomonas phage vB_PaeS_PcyII-40 PfII40a	LT608331.1	SCM62023.1	hypothetical protein	32795..33014(1)
Pseudomonas phage vB_Pae_CF28a	MK511018.1	QBI81174.1	hypothetical protein	33021..33240(1)
Pseudomonas phage vB_Pae_BR327a	MK511036.1	QBI82225.1	hypothetical protein	32989..33208(1)
Pseudomonas phage UMP151	MK934841.1	QDF15019.1	hypothetical protein	34484..34715(1)
Pseudomonas virus DMS3	NC 008717.1	YP 950471.1	hypothetical protein	32255..32474(1)
Pseudomonas virus MP22	NC 009818.1	YP 001469177.1	hypothetical protein	32169..32388(1)
Pseudomonas virus MP38	NC 011611.1	YP 002332360.1	hypothetical protein	32651..32870(1)
Pseudomonas phage MP42	NC 018274.1	YP 006560546.1	hypothetical protein	32682..32901(1)
Pseudomonas phage JBD30	NC 020198.1	YP 007392359.1	hypothetical protein	32711..32930(1)
Pseudomonas phage JBD88a	NC 020200.1	YP 007392458.1	hypothetical protein	32187..32406(1)
Pseudomonas phage JBD24	NC 020203.1	YP 007392817.1	hypothetical protein	32839..33058(1)
Pseudomonas phage MP48	NC 024782.1	YP 009055275.1	hypothetical protein	32595..32814(1)
Pseudomonas phage vB_PaeS_PAO1_Ab30	NC 026601.1	YP 009125694.1	hypothetical protein	32994..33213(1)
Pseudomonas phage JBD69	NC 030908.1	YP 009273678.1	hypothetical protein	32704..32923(1)
Pseudomonas phage JBD93	NC 030918.1	YP 009274639.1	hypothetical protein	32384..32603(1)
Pseudomonas virus FHA0480	NC 041851.1	YP 009591736.1	hypothetical protein	33079..33298(1)
-------------
Pseudomonas phage JBD16C	KU199707.1	AMD42546.1	hypothetical protein	32387..34595(1)
Pseudomonas phage vB_PaeS_PcyII-40 PfII40a	LT608331.1	SCM62025.1	hypothetical protein	33003..35211(1)
Pseudomonas phage vB_Pae_CF28a	MK511018.1	QBI81175.1	hypothetical protein	33229..35437(1)
Pseudomonas phage vB_Pae_BR327a	MK511036.1	QBI82226.1	hypothetical protein	33197..35405(1)
Pseudomonas phage UMP151	MK934841.1	QDF15020.1	hypothetical protein	34701..36912(1)
Pseudomonas virus DMS3	NC 008717.1	YP 950472.1	hypothetical protein	32463..34671(1)
Pseudomonas virus MP22	NC 009818.1	YP 001469178.1	hypothetical protein	32377..34585(1)
Pseudomonas virus MP38	NC 011611.1	YP 002332361.1	hypothetical protein	32859..35067(1)
Pseudomonas phage MP42	NC 018274.1	YP 006560547.1	hypothetical protein	32890..35098(1)
Pseudomonas phage JBD30	NC 020198.1	YP 007392360.1	hypothetical protein	32919..35127(1)
Pseudomonas phage JBD88a	NC 020200.1	YP 007392459.1	hypothetical protein	32395..34603(1)
Pseudomonas phage JBD24	NC 020203.1	YP 007392818.1	hypothetical protein	33047..35255(1)
Pseudomonas phage MP48	NC 024782.1	YP 009055276.1	hypothetical protein	32803..35011(1)
Pseudomonas phage vB_PaeS_PAO1_Ab30	NC 026601.1	YP 009125695.1	hypothetical protein	33202..35410(1)
Pseudomonas phage JBD69	NC 030908.1	YP 009273679.1	hypothetical protein	32912..35120(1)
Pseudomonas phage JBD93	NC 030918.1	YP 009274640.1	hypothetical protein	32592..34800(1)
Pseudomonas virus FHA0480	NC 041851.1	YP 009591737.1	hypothetical protein	33287..35495(1)
-------------
Pseudomonas phage JBD16C	KU199707.1	AMD42541.1	hypothetical protein	28497..29421(1)
Pseudomonas phage vB_PaeS_PcyII-40 PfII40a	LT608331.1	SCM62018.1	hypothetical protein	29113..30037(1)
Pseudomonas phage vB_Pae_CF28a	MK511018.1	QBI81170.1	hypothetical protein	29339..30263(1)
Pseudomonas phage vB_Pae_BR327a	MK511036.1	QBI82221.1	hypothetical protein	29307..30231(1)
Pseudomonas phage UMP151	MK934841.1	QDF15015.1	hypothetical protein	30810..31734(1)
Pseudomonas virus DMS3	NC 008717.1	YP 950467.1	hypothetical protein	28573..29497(1)
Pseudomonas virus MP22	NC 009818.1	YP 001469173.1	hypothetical protein	28487..29411(1)
Pseudomonas virus MP38	NC 011611.1	YP 002332356.1	hypothetical protein	28969..29893(1)
Pseudomonas phage MP42	NC 018274.1	YP 006560543.1	hypothetical protein	29000..29924(1)
Pseudomonas phage JBD30	NC 020198.1	YP 007392355.1	hypothetical protein	29039..29963(1)
Pseudomonas phage JBD88a	NC 020200.1	YP 007392454.1	hypothetical protein	28505..29429(1)
Pseudomonas phage JBD24	NC 020203.1	YP 007392813.1	hypothetical protein	29157..30081(1)
Pseudomonas phage MP48	NC 024782.1	YP 009055271.1	hypothetical protein	28913..29837(1)
Pseudomonas phage vB_PaeS_PAO1_Ab30	NC 026601.1	YP 009125690.1	hypothetical protein	29312..30236(1)
Pseudomonas phage JBD69	NC 030908.1	YP 009273674.1	hypothetical protein	29022..29946(1)
Pseudomonas phage JBD93	NC 030918.1	YP 009274635.1	hypothetical protein	28702..29626(1)
Pseudomonas virus FHA0480	NC 041851.1	YP 009591732.1	hypothetical protein	29397..30321(1)
---- 16 ----
Phage name	Phage acc. no.	Protein acc. no.	Product	Protein location
Escherichia virus Mu 3F6	LR595867.1	VUD37911.1	Phage tail fibers	33134..33668(1)
Yersinia phage vB_YpM 3	MT374852.1	QKE55369.1	hypothetical protein	32867..33395(1)
Yersinia phage vB_YpM 3	MT374852.1	QKE55370.1	hypothetical protein	33425..33959(-1)
Yersinia phage vB_YpM 5	MT374853.1	QKE55380.1	hypothetical protein	895..1429(1)
Yersinia phage vB_YpM 5	MT374853.1	QKE55381.1	hypothetical protein	1457..1985(-1)
Yersinia phage vB_YpM 6	MT374854.1	QKE55433.1	hypothetical protein	32..560(-1)
Yersinia phage vB_YpM 23	MT374856.1	QKE55578.1	hypothetical protein	36769..37297(1)
Yersinia phage vB_YpM 23	MT374856.1	QKE55579.1	hypothetical protein	37327..37861(-1)
Yersinia phage vB_YpM_Tongde	MT591577.1	QMP18909.1	hypothetical protein	3041..3569(1)
Yersinia phage vB_YpM_Tongde	MT591577.1	QMP18910.1	hypothetical protein	3599..4136(-1)
Escherichia phage Mu	NC 000929.1	NP 050654.1	tail fiber assembly protein	32974..33502(1)
Escherichia phage Mu	NC 000929.1	NP 602302.1	tail fiber assembly protein	33530..34064(-1)
Escherichia phage D108	NC 013594.1	YP 003335799.1	tail fiber assembly protein	33012..33540(1)
Escherichia phage D108	NC 013594.1	YP 003335800.1	tail fiber assembly protein	33568..34102(-1)
Shigella phage SfMu	NC 027382.1	YP 009152236.1	tail fiber assembly protein	33338..33872(1)
Shigella phage SfMu	NC 027382.1	YP 009152237.1	tail fiber assembly protein	33900..34428(-1)
-------------
Pseudomonas phage vB_Pae_CF28a	KU199707.1	AMD42544.1	hypothetical protein	31943..32183(1)
Pseudomonas phage vB_Pae_CF28a	MK511018.1	QBI81173.1	hypothetical protein	32785..33025(1)
Pseudomonas phage vB_Pae_BR327a	MK511036.1	QBI82224.1	hypothetical protein	32753..32993(1)
Pseudomonas phage UMP151	MK934841.1	QDF15018.1	hypothetical protein	34257..34488(1)
Pseudomonas virus DMS3	NC 008717.1	YP 950470.1	hypothetical protein	32019..32259(1)
Pseudomonas virus MP22	NC 009818.1	YP 001469176.1	hypothetical protein	31933..32173(1)
Pseudomonas virus MP38	NC 011611.1	YP 002332359.1	hypothetical protein	32415..32655(1)
Pseudomonas phage MP42	NC 018274.1	YP 006560545.1	hypothetical protein	32446..32686(1)
Pseudomonas phage JBD30	NC 020198.1	YP 007392358.1	hypothetical protein	32484..32715(1)
Pseudomonas phage JBD88a	NC 020200.1	YP 007392457.1	hypothetical protein	31951..32191(1)
Pseudomonas phage JBD24	NC 020203.1	YP 007392816.1	hypothetical protein	32603..32843(1)
Pseudomonas phage MP48	NC 024782.1	YP 009055274.1	hypothetical protein	32359..32599(1)
Pseudomonas phage vB_PaeS_PAO1_Ab30	NC 026601.1	YP 009125693.1	hypothetical protein	32758..32998(1)
Pseudomonas phage JBD69	NC 030908.1	YP 009273677.1	hypothetical protein	32468..32708(1)
Pseudomonas phage JBD93	NC 030918.1	YP 009274638.1	hypothetical protein	32148..32388(1)
Pseudomonas virus FHA0480	NC 041851.1	YP 009591735.1	hypothetical protein	32843..33083(1)
-------------
Pseudomonas phage JBD16C	KU199707.1	AMD42520.1	hypothetical protein	11521..11710(1)
Pseudomonas phage vB_PaeS_PcyII-40 PfII40a	LT608331.1	SCM61980.1	hypothetical protein	12076..12265(1)
Pseudomonas phage vB_Pae_CF28a	MK511018.1	QBI81148.1	hypothetical protein	12585..12774(1)
Pseudomonas phage vB_Pae_BR327a	MK511036.1	QBI82199.1	hypothetical protein	12553..12742(1)
Pseudomonas virus DMS3	NC 008717.1	YP 950447.1	hypothetical protein	12066..12255(1)
Pseudomonas virus MP22	NC 009818.1	YP 001469152.1	hypothetical protein	11555..11744(1)
Pseudomonas virus MP38	NC 011611.1	YP 002332337.1	hypothetical protein	12686..12875(1)
Pseudomonas phage MP42	NC 018274.1	YP 006560522.1	hypothetical protein	12471..12660(1)
Pseudomonas phage JBD30	NC 020198.1	YP 007392335.1	hypothetical protein	12510..12699(1)
Pseudomonas phage JBD88a	NC 020200.1	YP 007392433.1	hypothetical protein	11544..11733(1)
Pseudomonas phage JBD24	NC 020203.1	YP 007392790.1	hypothetical protein	12403..12592(1)
Pseudomonas phage MP48	NC 024782.1	YP 009055251.1	hypothetical protein	12044..12233(1)
Pseudomonas phage vB_PaeS_PAO1_Ab30	NC 026601.1	YP 009125667.1	hypothetical protein	12558..12747(1)
Pseudomonas phage JBD69	NC 030908.1	YP 009273654.1	hypothetical protein	12493..12682(1)
Pseudomonas phage JBD93	NC 030918.1	YP 009274615.1	hypothetical protein	12082..12271(1)
Pseudomonas virus FHA0480	NC 041851.1	YP 009591712.1	hypothetical protein	12465..12654(1)
-------------
Pseudomonas phage JBD16C	KU199707.1	AMD42542.1	hypothetical protein	29420..31124(1)
Pseudomonas phage vB_PaeS_PcyII-40 PfII40a	LT608331.1	SCM62019.1	hypothetical protein	30036..31740(1)
Pseudomonas phage vB_Pae_CF28a	MK511018.1	QBI81171.1	hypothetical protein	30262..31966(1)
Pseudomonas phage vB_Pae_BR327a	MK511036.1	QBI82222.1	hypothetical protein	30230..31934(1)
Pseudomonas virus DMS3	MK934841.1	QDF15016.1	hypothetical protein	31736..33443(1)
Pseudomonas virus MP22	NC 008717.1	YP 950468.1	hypothetical protein	29496..31200(1)
Pseudomonas virus MP38	NC 009818.1	YP 001469174.1	hypothetical protein	29410..31114(1)
Pseudomonas phage MP42	NC 011611.1	YP 002332357.1	hypothetical protein	29892..31596(1)
Pseudomonas phage JBD30	NC 020198.1	YP 007392356.1	hypothetical protein	29962..31666(1)
Pseudomonas phage JBD88a	NC 020200.1	YP 007392455.1	hypothetical protein	29428..31132(1)
Pseudomonas phage JBD24	NC 020203.1	YP 007392814.1	hypothetical protein	30080..31784(1)
Pseudomonas phage MP48	NC 024782.1	YP 009055272.1	hypothetical protein	29836..31540(1)
Pseudomonas phage vB_PaeS_PAO1_Ab30	NC 026601.1	YP 009125691.1	putative serine--glyoxylate aminotransferase	30235..31939(1)
Pseudomonas phage JBD69	NC 030908.1	YP 009273675.1	hypothetical protein	29945..31649(1)
Pseudomonas phage JBD93	NC 030918.1	YP 009274636.1	hypothetical protein	29625..31329(1)
Pseudomonas virus FHA0480	NC 041851.1	YP 009591733.1	hypothetical protein	30320..32024(1)
-------------
Pseudomonas phage JBD16C	KU199707.1	AMD42516.1	hypothetical protein	9908..10331(1)
Pseudomonas phage vB_PaeS_PcyII-40 PfII40a	LT608331.1	SCM61973.1	conserved membrane protein of unknown function	10439..10910(1)
Pseudomonas phage vB_Pae_CF28a	MK511018.1	QBI81143.1	hypothetical protein	10996..11419(1)
Pseudomonas phage vB_Pae_BR327a	MK511036.1	QBI82194.1	hypothetical protein	10964..11387(1)
Pseudomonas virus DMS3	NC 008717.1	YP 950444.1	hypothetical protein	10552..11023(1)
Pseudomonas virus MP22	NC 009818.1	YP 001469148.1	hypothetical protein	9918..10389(1)
Pseudomonas virus MP38	NC 011611.1	YP 002332333.1	hypothetical protein	11050..11497(1)
Pseudomonas phage MP42	NC 018274.1	YP 006560519.1	hypothetical protein	10957..11428(1)
Pseudomonas phage JBD30	NC 020198.1	YP 007392330.1	hypothetical protein	11044..11467(1)
Pseudomonas phage JBD88a	NC 020200.1	YP 007392428.1	hypothetical protein	9955..10378(1)
Pseudomonas phage JBD24	NC 020203.1	YP 007392785.1	hypothetical protein	10814..11237(1)
Pseudomonas phage MP48	NC 024782.1	YP 009055248.1	hypothetical protein	10407..10878(1)
Pseudomonas phage vB_PaeS_PAO1_Ab30	NC 026601.1	YP 009125662.1	hypothetical protein	10969..11392(1)
Pseudomonas phage JBD69	NC 030908.1	YP 009273649.1	hypothetical protein	11027..11450(1)
Pseudomonas phage JBD93	NC 030918.1	YP 009274610.1	hypothetical protein	10493..10916(1)
Pseudomonas virus FHA0480	NC 041851.1	YP 009591707.1	hypothetical protein	10828..11299(1)
-------------
Pseudomonas phage JBD16C	KU199707.1	AMD42505.1	hypothetical protein	5558..5972(1)
Pseudomonas phage vB_PaeS_PcyII-40 PfII40a	LT608331.1	SCM61951.1	hypothetical protein	6257..6671(1)
Pseudomonas phage vB_Pae_CF28a	MK511018.1	QBI81131.1	hypothetical protein	6954..7368(1)
Pseudomonas phage vB_Pae_BR327a	MK511036.1	QBI82182.1	hypothetical protein	6922..7336(1)
Pseudomonas virus DMS3	NC 008717.1	YP 950433.1	hypothetical protein	6372..6786(1)
Pseudomonas virus MP22	NC 009818.1	YP 001469138.1	hypothetical protein	5642..6056(1)
Pseudomonas virus MP38	NC 011611.1	YP 002332323.1	hypothetical protein	6870..7284(1)
Pseudomonas phage MP42	NC 018274.1	YP 006560508.1	hypothetical protein	6857..7271(1)
Pseudomonas phage JBD30	NC 020198.1	YP 007392318.1	hypothetical protein	6895..7309(1)
Pseudomonas phage JBD88a	NC 020200.1	YP 007392416.1	hypothetical protein	5623..6043(1)
Pseudomonas phage JBD24	NC 020203.1	YP 007392772.1	hypothetical protein	5897..6311(1)
Pseudomonas phage MP48	NC 024782.1	YP 009055238.1	hypothetical protein	6132..6546(1)
Pseudomonas phage vB_PaeS_PAO1_Ab30	NC 026601.1	YP 009125650.1	hypothetical protein	6927..7341(1)
Pseudomonas phage JBD69	NC 030908.1	YP 009273635.1	hypothetical protein	6129..6543(1)
Pseudomonas phage JBD93	NC 030918.1	YP 009274598.1	hypothetical protein	6355..6769(1)
Pseudomonas virus FHA0480	NC 041851.1	YP 009591695.1	hypothetical protein	6359..6773(1)
-------------
Ochrobactrum phage POA1180	KX669658.1	AOT25344.1	transcription regulator	30195..30492(1)
Pseudomonas phage JBD16C	KU199707.1	AMD42498.1	DNA-binding protein	979..1336(1)
Pseudomonas phage vB_PaeS_PcyII-40 PfII40a	LT608331.1	SCM61935.1	Ner	1064..1421(1)
Pseudomonas phage vB_Pae_CF28a	MK511018.1	QBI81122.1	DNA-binding protein	1129..1486(1)
Pseudomonas phage vB_Pae_BR327a	MK511036.1	QBI82173.1	DNA-binding protein	1097..1454(1)
Pseudomonas virus MP22	NC 009818.1	YP 001469131.1	helix-turn-helix domain-containing protein	1063..1420(1)
Pseudomonas virus MP38	NC 011611.1	YP 002332314.1	Ner-like protein	1069..1426(1)
Pseudomonas phage MP42	NC 018274.1	YP 006560499.1	Ner-like protein	1074..1386(1)
Pseudomonas phage JBD30	NC 020198.1	YP 007392309.1	helix-turn-helix domain-containing protein	1070..1427(1)
Pseudomonas phage JBD88a	NC 020200.1	YP 007392409.1	helix-turn-helix domain-containing protein	1053..1410(1)
Pseudomonas phage JBD24	NC 020203.1	YP 007392765.1	helix-turn-helix domain-containing protein	1099..1456(1)
Pseudomonas phage MP48	NC 024782.1	YP 009055230.1	Ner-like protein	1041..1386(1)
Pseudomonas phage vB_PaeS_PAO1_Ab30	NC 026601.1	YP 009125641.1	helix-turn-helix domain-containing protein	1102..1459(1)
Pseudomonas phage JBD69	NC 030908.1	YP 009273627.1	helix-turn-helix domain-containing protein	1041..1386(1)
Pseudomonas phage JBD93	NC 030918.1	YP 009274590.1	helix-turn-helix domain-containing protein	1054..1411(1)
Pseudomonas virus FHA0480	NC 041851.1	YP 009591687.1	helix-turn-helix domain-containing protein	1058..1415(1)
-------------
Pseudomonas phage JBD16C	KU199707.1	AMD42506.1	hypothetical protein	5952..6246(1)
Pseudomonas phage vB_PaeS_PcyII-40 PfII40a	LT608331.1	SCM61953.1	hypothetical protein	6633..6945(1)
Pseudomonas phage vB_Pae_CF28a	MK511018.1	QBI81132.1	hypothetical protein	7330..7642(1)
Pseudomonas phage vB_Pae_BR327a	MK511036.1	QBI82183.1	hypothetical protein	7298..7610(1)
Pseudomonas virus DMS3	NC 008717.1	YP 950434.1	hypothetical protein	6787..7060(1)
Pseudomonas virus MP22	NC 009818.1	YP 001469139.1	hypothetical protein	6045..6330(1)
Pseudomonas virus MP38	NC 011611.1	YP 002332324.1	hypothetical protein	7273..7558(1)
Pseudomonas phage MP42	NC 018274.1	YP 006560509.1	hypothetical protein	7260..7545(1)
Pseudomonas phage JBD30	NC 020198.1	YP 007392319.1	hypothetical protein	7289..7583(1)
Pseudomonas phage JBD88a	NC 020200.1	YP 007392417.1	hypothetical protein	6017..6317(1)
Pseudomonas phage JBD24	NC 020203.1	YP 007392773.1	hypothetical protein	6312..6585(1)
Pseudomonas phage MP48	NC 024782.1	YP 009055239.1	hypothetical protein	6535..6820(1)
Pseudomonas phage vB_PaeS_PAO1_Ab30	NC 026601.1	YP 009125651.1	hypothetical protein	7321..7615(1)
Pseudomonas phage JBD69	NC 030908.1	YP 009273636.1	hypothetical protein	6505..6817(1)
Pseudomonas phage JBD93	NC 030918.1	YP 009274599.1	hypothetical protein	6776..7043(1)
Pseudomonas virus FHA0480	NC 041851.1	YP 009591696.1	hypothetical protein	6735..7047(1)
-------------
Pseudomonas phage JBD16C	KU199707.1	AMD42504.1	hypothetical protein	5442..5559(1)
Pseudomonas phage vB_PaeS_PcyII-40 PfII40a	LT608331.1	SCM61949.1	hypothetical protein	6141..6258(1)
Pseudomonas phage vB_Pae_CF28a	MK511018.1	QBI81130.1	hypothetical protein	6838..6955(1)
Pseudomonas phage vB_Pae_BR327a	MK511036.1	QBI82181.1	hypothetical protein	6806..6923(1)
Pseudomonas virus DMS3	NC 008717.1	YP 950432.1	hypothetical protein	6256..6373(1)
Pseudomonas virus MP22	NC 009818.1	YP 001469137.1	hypothetical protein	5526..5643(1)
Pseudomonas virus MP38	NC 011611.1	YP 002332322.1	hypothetical protein	6754..6871(1)
Pseudomonas phage MP42	NC 018274.1	YP 006560507.1	hypothetical protein	6741..6858(1)
Pseudomonas phage JBD30	NC 020198.1	YP 007392317.1	hypothetical protein	6779..6896(1)
Pseudomonas phage JBD88a	NC 020200.1	YP 007392415.1	hypothetical protein	5513..5630(1)
Pseudomonas phage JBD24	NC 020203.1	YP 007392771.1	hypothetical protein	5781..5898(1)
Pseudomonas phage MP48	NC 024782.1	YP 009055237.1	hypothetical protein	6016..6133(1)
Pseudomonas phage vB_PaeS_PAO1_Ab30	NC 026601.1	YP 009125649.1	hypothetical protein	6811..6928(1)
Pseudomonas phage JBD69	NC 030908.1	YP 009273634.1	hypothetical protein	6013..6130(1)
Pseudomonas phage JBD93	NC 030918.1	YP 009274597.1	hypothetical protein	6239..6356(1)
Pseudomonas virus FHA0480	NC 041851.1	YP 009591694.1	hypothetical protein	6243..6360(1)
---- 15 ----
Phage name	Phage acc. no.	Protein acc. no.	Product	Protein location
Alteromonadaceae phage B23	KY939598.1	AVI04939.1	hypothetical protein	12010..12235(1)
Vibrio phage 1.028.O. 10N.286.45.B6	MG592412.1	AUR82806.1	C4 DksA/TraR-type zinc finger protein	10566..10785(1)
Vibrio phage 1.136.O. 10N.261.45.E11	MG592507.1	AUR90027.1	hypothetical protein	10566..10785(1)
Vibrio phage 1.142.O. 10N.261.49.E11	MG592513.1	AUR90345.1	C4 DksA/TraR-type zinc finger protein	10566..10785(1)
Vibrio phage 1.156.O. 10N.261.45.A6	MG592524.1	AUR91141.1	C4 DksA/TraR-type zinc finger protein	10566..10785(1)
Vibrio phage 1.159.O. 10N.261.46.F12	MG592527.1	AUR91322.1	C4 DksA/TraR-type zinc finger protein	10566..10785(1)
Vibrio phage 1.217.O. 10N.261.45.A1	MG592588.1	AUR96220.1	C4 DksA/TraR-type zinc finger protein	10566..10785(1)
Vibrio phage 1.219.O. 10N.261.45.E2	MG592589.1	AUR96270.1	C4 DksA/TraR-type zinc finger protein	10566..10785(1)
Vibrio phage 2.159.A. 10N.261.46.F12	MG592669.1	AUS02504.1	C4 DksA/TraR-type zinc finger protein	10566..10785(1)
Vibrio phage 2.159.B. 10N.261.46.F12	MG592670.1	AUS02554.1	C4 DksA/TraR-type zinc finger protein	10566..10785(1)
Curvibacter phage TJ1	MH766655.1	QDB70112.1	hypothetical protein	6322..6535(-1)
Burkholderia phage KS10	NC 011216.1	YP 002221423.1	TraR/DksA C4-type zinc finger protein	5678..5903(-1)
Vibrio phage martha 12B12	NC 021070.1	YP 007877529.1	TraR/DksA family transcriptional regulator	22075..22294(-1)
vB_SspM_MuM16-2	MZ568828	MuM16-2_p28	C4-type zinc finger protein, DksA/TraR family protein	21965..22181(-1)
Ralstonia phage RS138	NC 029107.1	YP 009226533.1	TraR/DksA C4-type zinc finger protein	13575..13803(1)
-------------
Pseudomonas phage JBD16C	KU199707.1	AMD42548.1	hypothetical protein	35762..36053(1)
Pseudomonas phage vB_PaeS_PcyII-40 PfII40a	LT608331.1	SCM62029.1	hypothetical protein	36352..36643(1)
Pseudomonas phage vB_Pae_CF28a	MK511018.1	QBI81177.1	hypothetical protein	36587..36875(1)
Pseudomonas phage vB_Pae_BR327a	MK511036.1	QBI82228.1	hypothetical protein	36555..36843(1)
Pseudomonas phage UMP151	MK934841.1	QDF15022.1	hypothetical protein	38053..38344(1)
Pseudomonas virus MP22	NC 009818.1	YP 001469180.1	hypothetical protein	35729..36020(1)
Pseudomonas virus MP38	NC 011611.1	YP 002332363.1	hypothetical protein	36208..36496(1)
Pseudomonas phage JBD30	NC 020198.1	YP 007392362.1	hypothetical protein	36268..36556(1)
Pseudomonas phage JBD88a	NC 020200.1	YP 007392461.1	hypothetical protein	35747..36038(1)
Pseudomonas phage JBD24	NC 020203.1	YP 007392820.1	hypothetical protein	36423..36693(1)
Pseudomonas phage MP48	NC 024782.1	YP 009055278.1	hypothetical protein	36155..36449(1)
Pseudomonas phage vB_PaeS_PAO1_Ab30	NC 026601.1	YP 009125697.1	hypothetical protein	36560..36848(1)
Pseudomonas phage JBD69	NC 030908.1	YP 009273681.1	hypothetical protein	36270..36552(1)
Pseudomonas phage JBD93	NC 030918.1	YP 009274642.1	hypothetical protein	35968..36238(1)
Pseudomonas virus FHA0480	NC 041851.1	YP 009591739.1	hypothetical protein	36639..36927(1)
-------------
Pseudomonas phage vB_PaeS_PcyII-40 PfII40a	LT608331.1	SCM61979.1	hypothetical protein	11564..11966(1)
Pseudomonas phage vB_Pae_CF28a	MK511018.1	QBI81146.1	hypothetical protein	12073..12475(1)
Pseudomonas phage vB_Pae_BR327a	MK511036.1	QBI82197.1	hypothetical protein	12041..12443(1)
Pseudomonas virus DMS3	NC 008717.1	YP 950446.1	hypothetical protein	11554..11956(1)
Pseudomonas virus MP22	NC 009818.1	YP 001469151.1	hypothetical protein	11043..11445(1)
Pseudomonas virus MP38	NC 011611.1	YP 002332336.1	hypothetical protein	12174..12576(1)
Pseudomonas phage MP42	NC 018274.1	YP 006560521.1	hypothetical protein	11959..12361(1)
Pseudomonas phage JBD30	NC 020198.1	YP 007392333.1	hypothetical protein	11998..12400(1)
Pseudomonas phage JBD88a	NC 020200.1	YP 007392431.1	hypothetical protein	11032..11434(1)
Pseudomonas phage JBD24	NC 020203.1	YP 007392788.1	hypothetical protein	11891..12293(1)
Pseudomonas phage MP48	NC 024782.1	YP 009055250.1	hypothetical protein	11532..11934(1)
Pseudomonas phage vB_PaeS_PAO1_Ab30	NC 026601.1	YP 009125665.1	hypothetical protein	12046..12448(1)
Pseudomonas phage JBD69	NC 030908.1	YP 009273652.1	hypothetical protein	11981..12383(1)
Pseudomonas phage JBD93	NC 030918.1	YP 009274613.1	hypothetical protein	11570..11972(1)
Pseudomonas virus FHA0480	NC 041851.1	YP 009591710.1	hypothetical protein	11953..12355(1)
-------------
Pseudomonas phage vB_PaeS_PcyII-40 PfII40a	LT608331.1	SCM62012.1	hypothetical protein	23825..24323(1)
Pseudomonas phage vB_Pae_CF28a	MK511018.1	QBI81167.1	hypothetical protein	24249..24744(1)
Pseudomonas phage vB_Pae_BR327a	MK511036.1	QBI82218.1	hypothetical protein	24217..24712(1)
Pseudomonas virus DMS3	MK934841.1	QDF15011.1	hypothetical protein	25474..25957(1)
Pseudomonas virus MP22	NC 008717.1	YP 950464.1	hypothetical protein	23483..23978(1)
Pseudomonas virus MP38	NC 009818.1	YP 001469170.1	hypothetical protein	23199..23697(1)
Pseudomonas phage MP42	NC 011611.1	YP 002332353.1	hypothetical protein gpG	23660..24179(1)
Pseudomonas phage JBD30	NC 018274.1	YP 006560540.1	hypothetical protein	23915..24410(1)
Pseudomonas phage JBD88a	NC 020198.1	YP 007392352.1	hypothetical protein	23954..24449(1)
Pseudomonas phage JBD24	NC 020203.1	YP 007392810.1	hypothetical protein	24067..24562(1)
Pseudomonas phage MP48	NC 024782.1	YP 009055268.1	hypothetical protein	23771..24257(1)
Pseudomonas phage vB_PaeS_PAO1_Ab30	NC 026601.1	YP 009125687.1	hypothetical protein	24222..24717(1)
Pseudomonas phage JBD69	NC 030908.1	YP 009273671.1	hypothetical protein	23955..24432(1)
Pseudomonas phage JBD93	NC 030918.1	YP 009274632.1	hypothetical protein	23414..23912(1)
Pseudomonas virus FHA0480	NC 041851.1	YP 009591729.1	hypothetical protein	24109..24607(1)
-------------
Pseudomonas phage JBD16C	KU199707.1	AMD42532.1	hypothetical protein	20724..21165(1)
Pseudomonas phage vB_PaeS_PcyII-40 PfII40a	LT608331.1	SCM62002.1	hypothetical protein	21359..21800(1)
Pseudomonas phage vB_Pae_CF28a	MK511018.1	QBI81161.1	hypothetical protein	21884..22226(1)
Pseudomonas phage vB_Pae_BR327a	MK511036.1	QBI82212.1	hypothetical protein	21852..22194(1)
Pseudomonas virus DMS3	NC 008717.1	YP 950458.1	hypothetical protein	21118..21460(1)
Pseudomonas virus MP22	NC 009818.1	YP 001469163.1	hypothetical protein	20733..21174(1)
Pseudomonas virus MP38	NC 011611.1	YP 002332346.1	hypothetical protein	21195..21636(1)
Pseudomonas phage MP42	NC 018274.1	YP 006560533.1	hypothetical protein	21550..21892(1)
Pseudomonas phage JBD30	NC 020198.1	YP 007392346.1	hypothetical protein	21589..21931(1)
Pseudomonas phage JBD88a	NC 020200.1	YP 007392445.1	hypothetical protein	20746..21187(1)
Pseudomonas phage JBD24	NC 020203.1	YP 007392804.1	hypothetical protein	21702..22044(1)
Pseudomonas phage MP48	NC 024782.1	YP 009055261.1	hypothetical protein	21307..21748(1)
Pseudomonas phage vB_PaeS_PAO1_Ab30	NC 026601.1	YP 009125681.1	hypothetical protein	21857..22199(1)
Pseudomonas phage JBD69	NC 030908.1	YP 009273665.1	hypothetical protein	21572..21914(1)
Pseudomonas phage JBD93	NC 030918.1	YP 009274626.1	hypothetical protein	20948..21389(1)
---- 14 ----
Phage name	Phage acc. no.	Protein acc. no.	Product	Protein location
Pseudomonas phage vB_PaeS_PcyII-40 PfII40a	LT608331.1	SCM62027.1	hypothetical protein	35207..36356(1)
Pseudomonas phage vB_Pae_CF28a	MK511018.1	QBI81176.1	putative glycoprotein	35433..36585(1)
Pseudomonas phage vB_Pae_BR327a	MK511036.1	QBI82227.1	putative glycoprotein	35401..36553(1)
Pseudomonas phage UMP151	MK934841.1	QDF15021.1	hypothetical protein	36908..38057(1)
Pseudomonas virus MP22	NC 009818.1	YP 001469179.1	hypothetical protein	34581..35733(1)
Pseudomonas virus MP38	NC 011611.1	YP 002332362.1	hypothetical protein	35063..36212(1)
Pseudomonas phage JBD30	NC 020198.1	YP 007392361.1	hypothetical protein	35123..36272(1)
Pseudomonas phage JBD88a	NC 020200.1	YP 007392460.1	hypothetical protein	34599..35751(1)
Pseudomonas phage JBD24	NC 020203.1	YP 007392819.1	hypothetical protein	35251..36403(1)
Pseudomonas phage MP48	NC 024782.1	YP 009055277.1	hypothetical protein	35007..36159(1)
Pseudomonas phage vB_PaeS_PAO1_Ab30	NC 026601.1	YP 009125696.1	DUF2793 domain-containing protein	35406..36558(1)
Pseudomonas phage JBD69	NC 030908.1	YP 009273680.1	hypothetical protein	35116..36268(1)
Pseudomonas phage JBD93	NC 030918.1	YP 009274641.1	hypothetical protein	34796..35948(1)
Pseudomonas virus FHA0480	NC 041851.1	YP 009591738.1	hypothetical protein	35491..36643(1)
-------------
Pseudomonas phage JBD16C	KU199707.1	AMD42533.1	hypothetical protein	21164..21332(1)
Pseudomonas phage vB_Pae_CF28a	MK511018.1	QBI81162.1	hypothetical protein	22225..22393(1)
Pseudomonas phage vB_Pae_BR327a	MK511036.1	QBI82213.1	hypothetical protein	22193..22361(1)
Pseudomonas virus DMS3	NC 008717.1	YP 950459.1	hypothetical protein	21459..21627(1)
Pseudomonas virus MP22	NC 009818.1	YP 001469164.1	hypothetical protein	21173..21341(1)
Pseudomonas virus MP38	NC 011611.1	YP 002332347.1	hypothetical protein	21635..21803(1)
Pseudomonas phage MP42	NC 018274.1	YP 006560534.1	hypothetical protein	21891..22059(1)
Pseudomonas phage JBD30	NC 020198.1	YP 007392347.1	hypothetical protein	21930..22098(1)
Pseudomonas phage JBD88a	NC 020200.1	YP 007392446.1	hypothetical protein	21186..21354(1)
Pseudomonas phage JBD24	NC 020203.1	YP 007392805.1	hypothetical protein	22043..22211(1)
Pseudomonas phage MP48	NC 024782.1	YP 009055262.1	hypothetical protein	21747..21915(1)
Pseudomonas phage vB_PaeS_PAO1_Ab30	NC 026601.1	YP 009125682.1	hypothetical protein	22198..22366(1)
Pseudomonas phage JBD69	NC 030908.1	YP 009273666.1	hypothetical protein	21913..22081(1)
Pseudomonas phage JBD93	NC 030918.1	YP 009274627.1	hypothetical protein	21388..21556(1)
-------------
Pseudomonas phage JBD16C	KU199707.1	AMD42515.1	hypothetical protein	9568..9916(1)
Pseudomonas phage vB_PaeS_PcyII-40 PfII40a	LT608331.1	SCM61971.1	hypothetical protein	10147..10495(1)
Pseudomonas phage vB_Pae_CF28a	MK511018.1	QBI81142.1	hypothetical protein	10656..11004(1)
Pseudomonas phage vB_Pae_BR327a	MK511036.1	QBI82193.1	hypothetical protein	10624..10972(1)
Pseudomonas virus MP22	NC 009818.1	YP 001469147.1	hypothetical protein	9626..9974(1)
Pseudomonas virus MP38	NC 011611.1	YP 002332332.1	hypothetical protein	10758..11106(1)
Pseudomonas phage MP42	NC 018274.1	YP 006560518.1	hypothetical protein	10665..11013(1)
Pseudomonas phage JBD30	NC 020198.1	YP 007392329.1	hypothetical protein	10704..11052(1)
Pseudomonas phage JBD88a	NC 020200.1	YP 007392427.1	hypothetical protein	9615..9963(1)
Pseudomonas phage JBD24	NC 020203.1	YP 007392784.1	hypothetical protein	10474..10822(1)
Pseudomonas phage MP48	NC 024782.1	YP 009055247.1	hypothetical protein	10115..10463(1)
Pseudomonas phage vB_PaeS_PAO1_Ab30	NC 026601.1	YP 009125661.1	hypothetical protein	10629..10977(1)
Pseudomonas phage JBD69	NC 030908.1	YP 009273648.1	hypothetical protein	10687..11035(1)
Pseudomonas phage JBD93	NC 030918.1	YP 009274609.1	hypothetical protein	10153..10501(1)
---- 13 ----
Phage name	Phage acc. no.	Protein acc. no.	Product	Protein location
Pseudomonas phage JBD16C	KU199707.1	AMD42512.1	hypothetical protein	7964..8234(1)
Pseudomonas phage vB_PaeS_PcyII-40 PfII40a	LT608331.1	SCM61964.1	hypothetical protein	8567..8837(1)
Pseudomonas virus DMS3	NC 008717.1	YP 950440.1	hypothetical protein	8681..8951(1)
Pseudomonas virus MP22	NC 009818.1	YP 001469143.1	hypothetical protein	8046..8316(1)
Pseudomonas virus MP38	NC 011611.1	YP 002332328.1	hypothetical protein	9178..9448(1)
Pseudomonas phage MP42	NC 018274.1	YP 006560514.1	hypothetical protein	9086..9356(1)
Pseudomonas phage JBD30	NC 020198.1	YP 007392325.1	hypothetical protein	9125..9395(1)
Pseudomonas phage JBD88a	NC 020200.1	YP 007392423.1	hypothetical protein	8035..8305(1)
Pseudomonas phage JBD24	NC 020203.1	YP 007392779.1	hypothetical protein	8207..8477(1)
Pseudomonas phage MP48	NC 024782.1	YP 009055243.1	hypothetical protein	8536..8806(1)
Pseudomonas phage JBD69	NC 030908.1	YP 009273644.1	hypothetical protein	9167..9437(1)
Pseudomonas phage JBD93	NC 030918.1	YP 009274605.1	hypothetical protein	8574..8844(1)
Pseudomonas virus FHA0480	NC 041851.1	YP 009591703.1	hypothetical protein	8957..9227(1)
-------------
Pseudomonas phage JBD16C	KU199707.1	AMD42509.1	hypothetical protein	7161..7470(1)
Pseudomonas phage vB_PaeS_PcyII-40 PfII40a	LT608331.1	SCM61959.1	hypothetical protein	7764..8073(1)
Pseudomonas phage vB_Pae_CF28a	MK511018.1	QBI81134.1	hypothetical protein	8274..8583(1)
Pseudomonas phage vB_Pae_BR327a	MK511036.1	QBI82185.1	hypothetical protein	8242..8551(1)
Pseudomonas virus DMS3	NC 008717.1	YP 950437.1	hypothetical protein	7905..8187(1)
Pseudomonas virus MP22	NC 009818.1	YP 001469141.1	hypothetical protein	7244..7553(1)
Pseudomonas virus MP38	NC 011611.1	YP 002332326.1	hypothetical protein	8376..8685(1)
Pseudomonas phage MP42	NC 018274.1	YP 006560512.1	hypothetical protein	8284..8593(1)
Pseudomonas phage JBD30	NC 020198.1	YP 007392322.1	hypothetical protein	8322..8631(1)
Pseudomonas phage JBD88a	NC 020200.1	YP 007392420.1	hypothetical protein	7232..7541(1)
Pseudomonas phage JBD24	NC 020203.1	YP 007392776.1	hypothetical protein	7404..7713(1)
Pseudomonas phage MP48	NC 024782.1	YP 009055241.1	hypothetical protein	7734..8043(1)
Pseudomonas phage vB_PaeS_PAO1_Ab30	NC 026601.1	YP 009125653.1	hypothetical protein	8247..8556(1)
-------------
Pseudomonas phage JBD16C	KU199707.1	AMD42511.1	hypothetical protein	7755..7962(1)
Pseudomonas phage vB_PaeS_PcyII-40 PfII40a	LT608331.1	SCM61963.1	hypothetical protein	8358..8565(1)
Pseudomonas phage vB_Pae_CF28a	MK511018.1	QBI81136.1	hypothetical protein	8868..9075(1)
Pseudomonas phage vB_Pae_BR327a	MK511036.1	QBI82187.1	hypothetical protein	8836..9043(1)
Pseudomonas phage UMP151	MK934841.1	QDF14973.1	hypothetical protein	1853..2045(-1)
Pseudomonas virus DMS3	NC 008717.1	YP 950439.1	hypothetical protein	8472..8679(1)
Pseudomonas phage JBD30	NC 020198.1	YP 007392324.1	hypothetical protein	8916..9123(1)
Pseudomonas phage JBD88a	NC 020200.1	YP 007392422.1	hypothetical protein	7826..8033(1)
Pseudomonas phage JBD24	NC 020203.1	YP 007392778.1	hypothetical protein	7998..8205(1)
Pseudomonas phage vB_PaeS_PAO1_Ab30	NC 026601.1	YP 009125655.1	hypothetical protein	8841..9048(1)
Pseudomonas phage JBD69	NC 030908.1	YP 009273642.1	hypothetical protein	8518..8710(1)
Pseudomonas phage JBD93	NC 030918.1	YP 009274604.1	hypothetical protein	8365..8572(1)
Pseudomonas virus FHA0480	NC 041851.1	YP 009591702.1	hypothetical protein	8748..8955(1)
---- 12 ----
Phage name	Phage acc. no.	Protein acc. no.	Product	Protein location
Pseudomonas phage JBD16C	KU199707.1	AMD42549.1	hypothetical protein	36130..36355(1)
Pseudomonas phage vB_PaeS_PcyII-40 PfII40a	LT608331.1	SCM62031.1	hypothetical protein	36721..36946(1)
Pseudomonas phage vB_Pae_CF28a	MK511018.1	QBI81178.1	hypothetical protein	36953..37178(1)
Pseudomonas phage vB_Pae_BR327a	MK511036.1	QBI82229.1	hypothetical protein	36921..37146(1)
Pseudomonas virus DMS3	NC 008717.1	YP 950476.1	hypothetical protein	36103..36328(1)
Pseudomonas phage JBD30	NC 020198.1	YP 007392363.1	hypothetical protein	36634..36859(1)
Pseudomonas phage JBD88a	NC 020200.1	YP 007392462.1	hypothetical protein	36115..36340(1)
Pseudomonas phage JBD24	NC 020203.1	YP 007392821.1	hypothetical protein	36771..36996(1)
Pseudomonas phage vB_PaeS_PAO1_Ab30	NC 026601.1	YP 009125698.1	hypothetical protein	36926..37151(1)
Pseudomonas phage JBD69	NC 030908.1	YP 009273682.1	hypothetical protein	36625..36850(1)
Pseudomonas phage JBD93	NC 030918.1	YP 009274643.1	hypothetical protein	36316..36541(1)
Pseudomonas virus FHA0480	NC 041851.1	YP 009591740.1	hypothetical protein	37000..37225(1)
-------------
Alteromonadaceae phage B23	KY939598.1	AVI04956.1	hypothetical protein	24329..24710(1)
Vibrio phage 1.028.O. 10N.286.45.B6	MG592412.1	AUR82824.1	tail assembly chaperone protein	23283..23655(1)
Vibrio phage 1.136.O. 10N.261.45.E11	MG592507.1	AUR90045.1	tail assembly chaperone protein	23283..23655(1)
Vibrio phage 1.142.O. 10N.261.49.E11	MG592513.1	AUR90363.1	tail assembly chaperone protein	23283..23655(1)
Vibrio phage 1.156.O. 10N.261.45.A6	MG592524.1	AUR91159.1	tail assembly chaperone protein	23283..23655(1)
Vibrio phage 1.159.O. 10N.261.46.F12	MG592527.1	AUR91340.1	tail assembly chaperone protein	23283..23655(1)
Vibrio phage 1.217.O. 10N.261.45.A1	MG592588.1	AUR96238.1	tail assembly chaperone protein	23283..23655(1)
Vibrio phage 1.219.O. 10N.261.45.E2	MG592589.1	AUR96288.1	tail assembly chaperone protein	23283..23655(1)
Vibrio phage 2.159.A. 10N.261.46.F12	MG592669.1	AUS02522.1	tail assembly chaperone protein	23283..23655(1)
Vibrio phage 2.159.B. 10N.261.46.F12	MG592670.1	AUS02572.1	tail assembly chaperone protein	23283..23655(1)
Vibrio phage martha 12B12	NC 021070.1	YP 007877510.1	extracellular solute-binding protein family 7 protein	8862..9207(-1)
vB_SspM_MuM16-2	MZ568828	MuM16-2_p09	hypothetical protein	8881..9226(-1)
-------------
Vibrio phage 1.028.O. 10N.286.45.B6	MG592412.1	AUR82803.1	hypothetical protein	9171..9732(1)
Vibrio phage 1.136.O. 10N.261.45.E11	MG592507.1	AUR90024.1	hypothetical protein	9171..9732(1)
Vibrio phage 1.142.O. 10N.261.49.E11	MG592513.1	AUR90342.1	hypothetical protein	9171..9732(1)
Vibrio phage 1.156.O. 10N.261.45.A6	MG592524.1	AUR91138.1	hypothetical protein	9171..9732(1)
Vibrio phage 1.159.O. 10N.261.46.F12	MG592527.1	AUR91319.1	hypothetical protein	9171..9732(1)
Vibrio phage 1.217.O. 10N.261.45.A1	MG592588.1	AUR96217.1	hypothetical protein	9171..9732(1)
Vibrio phage 1.219.O. 10N.261.45.E2	MG592589.1	AUR96267.1	hypothetical protein	9171..9732(1)
Vibrio phage 2.159.A. 10N.261.46.F12	MG592669.1	AUS02501.1	hypothetical protein	9171..9732(1)
Vibrio phage 2.159.B. 10N.261.46.F12	MG592670.1	AUS02551.1	hypothetical protein	9171..9732(1)
Yersinia phage vB_YpM 5	MT374853.1	QKE55404.1	hypothetical protein	14272..14833(1)
Yersinia phage vB_YpM 6	MT374854.1	QKE55456.1	hypothetical protein	12896..13457(1)
vB_SspM_MuM16-2	MZ568828	MuM16-2_p31	Lysozyme (N-acetylmuramidase) family, (EC 3.2.1.17)	23034..23619(-1)
-------------
Pseudomonas phage JBD16C	KU199707.1	AMD42528.1	hypothetical protein	18173..18398(1)
Pseudomonas phage vB_PaeS_PcyII-40 PfII40a	LT608331.1	SCM61996.1	hypothetical protein	18833..19058(1)
Pseudomonas phage vB_Pae_CF28a	MK511018.1	QBI81157.1	hypothetical protein	19358..19583(1)
Pseudomonas phage vB_Pae_BR327a	MK511036.1	QBI82208.1	hypothetical protein	19326..19551(1)
Pseudomonas virus DMS3	NC 008717.1	YP 950455.1	winged helix-turn-helix domain-containing protein	18596..18818(1)
Pseudomonas phage JBD30	NC 020198.1	YP 007392343.1	winged helix-turn-helix domain-containing protein	19052..19292(1)
Pseudomonas phage JBD88a	NC 020200.1	YP 007392441.1	hypothetical protein	18196..18421(1)
Pseudomonas phage JBD24	NC 020203.1	YP 007392800.1	hypothetical protein	19176..19401(1)
Pseudomonas phage vB_PaeS_PAO1_Ab30	NC 026601.1	YP 009125677.1	hypothetical protein	19331..19556(1)
Pseudomonas phage JBD69	NC 030908.1	YP 009273662.1	winged helix-turn-helix domain-containing protein	19035..19275(1)
Pseudomonas phage JBD93	NC 030918.1	YP 009274622.1	hypothetical protein	18422..18647(1)
Pseudomonas virus FHA0480	NC 041851.1	YP 009591720.1	hypothetical protein	19117..19342(1)
-------------
Alteromonadaceae phage B23	KY939598.1	AVI04952.1	hypothetical protein	21690..22227(1)
Vibrio phage 1.028.O. 10N.286.45.B6	MG592412.1	AUR82820.1	tail-completion protein	20618..21209(1)
Vibrio phage 1.136.O. 10N.261.45.E11	MG592507.1	AUR90041.1	DNA-binding domain protein	20618..21209(1)
Vibrio phage 1.142.O. 10N.261.49.E11	MG592513.1	AUR90359.1	tail-completion protein	20618..21209(1)
Vibrio phage 1.156.O. 10N.261.45.A6	MG592524.1	AUR91155.1	tail-completion protein	20618..21209(1)
Vibrio phage 1.159.O. 10N.261.46.F12	MG592527.1	AUR91336.1	tail-completion protein	20618..21209(1)
Vibrio phage 1.217.O. 10N.261.45.A1	MG592588.1	AUR96234.1	tail-completion protein	20618..21209(1)
Vibrio phage 1.219.O. 10N.261.45.E2	MG592589.1	AUR96284.1	tail-completion protein	20618..21209(1)
Vibrio phage 2.159.A. 10N.261.46.F12	MG592669.1	AUS02518.1	tail-completion protein	20618..21209(1)
Vibrio phage 2.159.B. 10N.261.46.F12	MG592670.1	AUS02568.1	tail-completion protein	20618..21209(1)
Vibrio phage martha 12B12	NC 021070.1	YP 007877514.1	hypothetical protein	11281..11872(-1)
vB_SspM_MuM16-2	MZ568828	MuM16-2_p13	Mu-like prophage FluMu protein gp37	11318..11912(-1)
---- 11 ----
Phage name	Phage acc. no.	Protein acc. no.	Product	Protein location
Vibrio phage 1.028.O. 10N.286.45.B6	MG592412.1	AUR82794.1	hypothetical protein	6319..6511(1)
Vibrio phage 1.136.O. 10N.261.45.E11	MG592507.1	AUR90015.1	protein of unknown function DUF935	6319..6511(1)
Vibrio phage 1.142.O. 10N.261.49.E11	MG592513.1	AUR90333.1	hypothetical protein	6319..6511(1)
Vibrio phage 1.156.O. 10N.261.45.A6	MG592524.1	AUR91129.1	hypothetical protein	6319..6511(1)
Vibrio phage 1.159.O. 10N.261.46.F12	MG592527.1	AUR91310.1	hypothetical protein	6319..6511(1)
Vibrio phage 1.217.O. 10N.261.45.A1	MG592588.1	AUR96208.1	hypothetical protein	6319..6511(1)
Vibrio phage 1.219.O. 10N.261.45.E2	MG592589.1	AUR96258.1	hypothetical protein	6319..6511(1)
Vibrio phage 2.159.A. 10N.261.46.F12	MG592669.1	AUS02492.1	hypothetical protein	6319..6511(1)
Vibrio phage 2.159.B. 10N.261.46.F12	MG592670.1	AUS02542.1	hypothetical protein	6319..6511(1)
Vibrio phage martha 12B12	NC 021070.1	YP 007877540.1	hypothetical protein	26309..26495(-1)
vB_SspM_MuM16-2	MZ568828	MuM16-2_p40	hypothetical protein	27163..27346(-1)
-------------
Pseudomonas phage JBD16C	KU199707.1	AMD42518.1	hypothetical protein	10746..10989(1)
Pseudomonas phage vB_PaeS_PcyII-40 PfII40a	LT608331.1	SCM61977.1	hypothetical protein	11325..11568(1)
Pseudomonas phage vB_Pae_CF28a	MK511018.1	QBI81145.1	hypothetical protein	11834..12077(1)
Pseudomonas phage vB_Pae_BR327a	MK511036.1	QBI82196.1	hypothetical protein	11802..12045(1)
Pseudomonas virus MP22	NC 009818.1	YP 001469150.1	hypothetical protein	10804..11047(1)
Pseudomonas virus MP38	NC 011611.1	YP 002332335.1	hypothetical protein	11935..12178(1)
Pseudomonas phage JBD88a	NC 020200.1	YP 007392430.1	hypothetical protein	10793..11036(1)
Pseudomonas phage JBD24	NC 020203.1	YP 007392787.1	hypothetical protein	11652..11895(1)
Pseudomonas phage vB_PaeS_PAO1_Ab30	NC 026601.1	YP 009125664.1	hypothetical protein	11807..12050(1)
Pseudomonas phage JBD93	NC 030918.1	YP 009274612.1	hypothetical protein	11331..11574(1)
Pseudomonas virus FHA0480	NC 041851.1	YP 009591709.1	hypothetical protein	11714..11957(1)
-------------
Vibrio phage 1.028.O. 10N.286.45.B6	MG592412.1	AUR82797.1	hypothetical protein	7010..7250(1)
Vibrio phage 1.136.O. 10N.261.45.E11	MG592507.1	AUR90018.1	winged helix-turn-helix DNA-binding domain protein	7010..7250(1)
Vibrio phage 1.142.O. 10N.261.49.E11	MG592513.1	AUR90336.1	hypothetical protein	7010..7250(1)
Vibrio phage 1.156.O. 10N.261.45.A6	MG592524.1	AUR91132.1	hypothetical protein	7010..7250(1)
Vibrio phage 1.159.O. 10N.261.46.F12	MG592527.1	AUR91313.1	hypothetical protein	7010..7250(1)
Vibrio phage 1.217.O. 10N.261.45.A1	MG592588.1	AUR96211.1	hypothetical protein	7010..7250(1)
Vibrio phage 1.219.O. 10N.261.45.E2	MG592589.1	AUR96261.1	hypothetical protein	7010..7250(1)
Vibrio phage 2.159.A. 10N.261.46.F12	MG592669.1	AUS02495.1	hypothetical protein	7010..7250(1)
Vibrio phage 2.159.B. 10N.261.46.F12	MG592670.1	AUS02545.1	hypothetical protein	7010..7250(1)
Vibrio phage martha 12B12	NC 021070.1	YP 007877537.1	hypothetical protein	25305..25542(-1)
vB_SspM_MuM16-2	MZ568828	MuM16-2_p37	hypothetical protein	25829..26084(-1)
-------------
Vibrio phage 1.028.O. 10N.286.45.B6	MG592412.1	AUR82815.1	hypothetical protein	18187..18436(1)
Vibrio phage 1.136.O. 10N.261.45.E11	MG592507.1	AUR90036.1	hypothetical protein	18187..18436(1)
Vibrio phage 1.142.O. 10N.261.49.E11	MG592513.1	AUR90354.1	hypothetical protein	18187..18436(1)
Vibrio phage 1.156.O. 10N.261.45.A6	MG592524.1	AUR91150.1	hypothetical protein	18187..18436(1)
Vibrio phage 1.159.O. 10N.261.46.F12	MG592527.1	AUR91331.1	hypothetical protein	18187..18436(1)
Vibrio phage 1.217.O. 10N.261.45.A1	MG592588.1	AUR96229.1	hypothetical protein	18187..18436(1)
Vibrio phage 1.219.O. 10N.261.45.E2	MG592589.1	AUR96279.1	hypothetical protein	18187..18436(1)
Vibrio phage 2.159.A. 10N.261.46.F12	MG592669.1	AUS02513.1	hypothetical protein	18187..18436(1)
Vibrio phage 2.159.B. 10N.261.46.F12	MG592670.1	AUS02563.1	hypothetical protein	18187..18436(1)
Vibrio phage martha 12B12	NC 021070.1	YP 007877519.1	hypothetical protein	14090..14339(-1)
vB_SspM_MuM16-2	MZ568828	MuM16-2_p18	hypothetical protein	14108..14366(-1)
-------------
Vibrio phage 1.028.O. 10N.286.45.B6	MG592412.1	AUR82805.1	coil containing protein	9979..10570(1)
Vibrio phage 1.136.O. 10N.261.45.E11	MG592507.1	AUR90026.1	hypothetical protein	9979..10570(1)
Vibrio phage 1.142.O. 10N.261.49.E11	MG592513.1	AUR90344.1	coil containing protein	9979..10570(1)
Vibrio phage 1.156.O. 10N.261.45.A6	MG592524.1	AUR91140.1	coil containing protein	9979..10570(1)
Vibrio phage 1.159.O. 10N.261.46.F12	MG592527.1	AUR91321.1	coil containing protein	9979..10570(1)
Vibrio phage 1.217.O. 10N.261.45.A1	MG592588.1	AUR96219.1	coil containing protein	9979..10570(1)
Vibrio phage 1.219.O. 10N.261.45.E2	MG592589.1	AUR96269.1	coil containing protein	9979..10570(1)
Vibrio phage 2.159.A. 10N.261.46.F12	MG592669.1	AUS02503.1	coil containing protein	9979..10570(1)
Vibrio phage 2.159.B. 10N.261.46.F12	MG592670.1	AUS02553.1	coil containing protein	9979..10570(1)
Vibrio phage martha 12B12	NC 021070.1	YP 007877530.1	hypothetical protein	22290..22881(-1)
vB_SspM_MuM16-2	MZ568828	MuM16-2_p29	hypothetical protein	22180..22789(-1)
-------------
Vibrio phage 1.028.O. 10N.286.45.B6	MG592412.1	AUR82804.1	hypothetical protein	9731..9995(1)
Vibrio phage 1.136.O. 10N.261.45.E11	MG592507.1	AUR90025.1	homeodomain-like protein	9731..9995(1)
Vibrio phage 1.142.O. 10N.261.49.E11	MG592513.1	AUR90343.1	hypothetical protein	9731..9995(1)
Vibrio phage 1.156.O. 10N.261.45.A6	MG592524.1	AUR91139.1	hypothetical protein	9731..9995(1)
Vibrio phage 1.159.O. 10N.261.46.F12	MG592527.1	AUR91320.1	hypothetical protein	9731..9995(1)
Vibrio phage 1.217.O. 10N.261.45.A1	MG592588.1	AUR96218.1	hypothetical protein	9731..9995(1)
Vibrio phage 1.219.O. 10N.261.45.E2	MG592589.1	AUR96268.1	hypothetical protein	9731..9995(1)
Vibrio phage 2.159.A. 10N.261.46.F12	MG592669.1	AUS02502.1	hypothetical protein	9731..9995(1)
Vibrio phage 2.159.B. 10N.261.46.F12	MG592670.1	AUS02552.1	hypothetical protein	9731..9995(1)
Vibrio phage martha 12B12	NC 021070.1	YP 007877531.1	hypothetical protein	22853..23129(-1)
vB_SspM_MuM16-2	MZ568828	MuM16-2_p30	hypothetical protein	22773..23034(-1)
-------------
Vibrio phage 1.028.O. 10N.286.45.B6	MG592412.1	AUR82816.1	hypothetical protein	18438..18996(1)
Vibrio phage 1.136.O. 10N.261.45.E11	MG592507.1	AUR90037.1	hypothetical protein	18438..18996(1)
Vibrio phage 1.142.O. 10N.261.49.E11	MG592513.1	AUR90355.1	hypothetical protein	18438..18996(1)
Vibrio phage 1.156.O. 10N.261.45.A6	MG592524.1	AUR91151.1	hypothetical protein	18438..18996(1)
Vibrio phage 1.159.O. 10N.261.46.F12	MG592527.1	AUR91332.1	hypothetical protein	18438..18996(1)
Vibrio phage 1.217.O. 10N.261.45.A1	MG592588.1	AUR96230.1	hypothetical protein	18438..18996(1)
Vibrio phage 1.219.O. 10N.261.45.E2	MG592589.1	AUR96280.1	hypothetical protein	18438..18996(1)
Vibrio phage 2.159.A. 10N.261.46.F12	MG592669.1	AUS02514.1	hypothetical protein	18438..18996(1)
Vibrio phage 2.159.B. 10N.261.46.F12	MG592670.1	AUS02564.1	hypothetical protein	18438..18996(1)
Vibrio phage martha 12B12	NC 021070.1	YP 007877518.1	hypothetical protein	13530..14088(-1)
vB_SspM_MuM16-2	MZ568828	MuM16-2_p17	hypothetical protein	13569..14106(-1)
-------------
Vibrio phage 1.028.O. 10N.286.45.B6	MG592412.1	AUR82812.1	head morphogenesis domain protein	15123..15918(1)
Vibrio phage 1.136.O. 10N.261.45.E11	MG592507.1	AUR90033.1	coil containing protein	15123..15918(1)
Vibrio phage 1.142.O. 10N.261.49.E11	MG592513.1	AUR90351.1	head morphogenesis domain protein	15123..15918(1)
Vibrio phage 1.156.O. 10N.261.45.A6	MG592524.1	AUR91147.1	head morphogenesis domain protein	15123..15918(1)
Vibrio phage 1.159.O. 10N.261.46.F12	MG592527.1	AUR91328.1	head morphogenesis domain protein	15123..15918(1)
Vibrio phage 1.217.O. 10N.261.45.A1	MG592588.1	AUR96226.1	head morphogenesis domain protein	15123..15918(1)
Vibrio phage 1.219.O. 10N.261.45.E2	MG592589.1	AUR96276.1	head morphogenesis domain protein	15123..15918(1)
Vibrio phage 2.159.A. 10N.261.46.F12	MG592669.1	AUS02510.1	head morphogenesis domain protein	15123..15918(1)
Vibrio phage 2.159.B. 10N.261.46.F12	MG592670.1	AUS02560.1	head morphogenesis domain protein	15123..15918(1)
Vibrio phage martha 12B12	NC 021070.1	YP 007877522.1	F protein	16594..17389(-1)
vB_SspM_MuM16-2	MZ568828	MuM16-2_p21	Phage (Mu-like) virion morphogenesis protein	16633..17413(-1)
---- 10 ----
Phage name	Phage acc. no.	Protein acc. no.	Product	Protein location
Vibrio phage 1.028.O. 10N.286.45.B6	MG592412.1	AUR82798.1	hypothetical protein	7265..7418(1)
Vibrio phage 1.136.O. 10N.261.45.E11	MG592507.1	AUR90019.1	coil containing protein	7265..7418(1)
Vibrio phage 1.142.O. 10N.261.49.E11	MG592513.1	AUR90337.1	hypothetical protein	7265..7418(1)
Vibrio phage 1.156.O. 10N.261.45.A6	MG592524.1	AUR91133.1	hypothetical protein	7265..7418(1)
Vibrio phage 1.159.O. 10N.261.46.F12	MG592527.1	AUR91314.1	hypothetical protein	7265..7418(1)
Vibrio phage 1.217.O. 10N.261.45.A1	MG592588.1	AUR96212.1	hypothetical protein	7265..7418(1)
Vibrio phage 1.219.O. 10N.261.45.E2	MG592589.1	AUR96262.1	hypothetical protein	7265..7418(1)
Vibrio phage 2.159.A. 10N.261.46.F12	MG592669.1	AUS02496.1	hypothetical protein	7265..7418(1)
Vibrio phage 2.159.B. 10N.261.46.F12	MG592670.1	AUS02546.1	hypothetical protein	7265..7418(1)
Vibrio phage martha 12B12	NC 021070.1	YP 007877536.1	hypothetical protein	25133..25286(-1)
-------------
Vibrio phage 1.028.O. 10N.286.45.B6	MG592412.1	AUR82817.1	coil containing protein	19034..19622(1)
Vibrio phage 1.136.O. 10N.261.45.E11	MG592507.1	AUR90038.1	hypothetical protein	19034..19622(1)
Vibrio phage 1.142.O. 10N.261.49.E11	MG592513.1	AUR90356.1	coil containing protein	19034..19622(1)
Vibrio phage 1.156.O. 10N.261.45.A6	MG592524.1	AUR91152.1	coil containing protein	19034..19622(1)
Vibrio phage 1.159.O. 10N.261.46.F12	MG592527.1	AUR91333.1	coil containing protein	19034..19622(1)
Vibrio phage 1.217.O. 10N.261.45.A1	MG592588.1	AUR96231.1	coil containing protein	19034..19622(1)
Vibrio phage 1.219.O. 10N.261.45.E2	MG592589.1	AUR96281.1	coil containing protein	19034..19622(1)
Vibrio phage 2.159.A. 10N.261.46.F12	MG592669.1	AUS02515.1	coil containing protein	19034..19622(1)
Vibrio phage 2.159.B. 10N.261.46.F12	MG592670.1	AUS02565.1	coil containing protein	19034..19622(1)
Vibrio phage martha 12B12	NC 021070.1	YP 007877517.1	hypothetical protein	12868..13450(-1)
-------------
Vibrio phage 1.028.O. 10N.286.45.B6	MG592412.1	AUR82821.1	protein of unknown function DUF2635	21224..21434(1)
Vibrio phage 1.136.O. 10N.261.45.E11	MG592507.1	AUR90042.1	peptidase S24/S26A/S26B	21224..21434(1)
Vibrio phage 1.142.O. 10N.261.49.E11	MG592513.1	AUR90360.1	protein of unknown function DUF2635	21224..21434(1)
Vibrio phage 1.156.O. 10N.261.45.A6	MG592524.1	AUR91156.1	protein of unknown function DUF2635	21224..21434(1)
Vibrio phage 1.159.O. 10N.261.46.F12	MG592527.1	AUR91337.1	protein of unknown function DUF2635	21224..21434(1)
Vibrio phage 1.217.O. 10N.261.45.A1	MG592588.1	AUR96235.1	protein of unknown function DUF2635	21224..21434(1)
Vibrio phage 1.219.O. 10N.261.45.E2	MG592589.1	AUR96285.1	protein of unknown function DUF2635	21224..21434(1)
Vibrio phage 2.159.A. 10N.261.46.F12	MG592669.1	AUS02519.1	protein of unknown function DUF2635	21224..21434(1)
Vibrio phage 2.159.B. 10N.261.46.F12	MG592670.1	AUS02569.1	protein of unknown function DUF2635	21224..21434(1)
Vibrio phage martha 12B12	NC 021070.1	YP 007877513.1	hypothetical protein	11056..11266(-1)
-------------
Vibrio phage 1.028.O. 10N.286.45.B6	MG592412.1	AUR82791.1	hypothetical protein	5632..5908(1)
Vibrio phage 1.136.O. 10N.261.45.E11	MG592507.1	AUR90012.1	hypothetical protein	5632..5908(1)
Vibrio phage 1.142.O. 10N.261.49.E11	MG592513.1	AUR90330.1	hypothetical protein	5632..5908(1)
Vibrio phage 1.156.O. 10N.261.45.A6	MG592524.1	AUR91126.1	hypothetical protein	5632..5908(1)
Vibrio phage 1.159.O. 10N.261.46.F12	MG592527.1	AUR91307.1	hypothetical protein	5632..5908(1)
Vibrio phage 1.217.O. 10N.261.45.A1	MG592588.1	AUR96205.1	hypothetical protein	5632..5908(1)
Vibrio phage 1.219.O. 10N.261.45.E2	MG592589.1	AUR96255.1	hypothetical protein	5632..5908(1)
Vibrio phage 2.159.A. 10N.261.46.F12	MG592669.1	AUS02489.1	hypothetical protein	5632..5908(1)
Vibrio phage 2.159.B. 10N.261.46.F12	MG592670.1	AUS02539.1	hypothetical protein	5632..5908(1)
Vibrio phage martha 12B12	NC 021070.1	YP 007877543.1	hypothetical protein	26906..27182(-1)
-------------
Vibrio phage 1.028.O. 10N.286.45.B6	MG592412.1	AUR82795.1	SEC-C motif protein	6498..6708(1)
Vibrio phage 1.136.O. 10N.261.45.E11	MG592507.1	AUR90016.1	coil containing protein	6498..6708(1)
Vibrio phage 1.142.O. 10N.261.49.E11	MG592513.1	AUR90334.1	SEC-C motif protein	6498..6708(1)
Vibrio phage 1.156.O. 10N.261.45.A6	MG592524.1	AUR91130.1	SEC-C motif protein	6498..6708(1)
Vibrio phage 1.159.O. 10N.261.46.F12	MG592527.1	AUR91311.1	SEC-C motif protein	6498..6708(1)
Vibrio phage 1.217.O. 10N.261.45.A1	MG592588.1	AUR96209.1	SEC-C motif protein	6498..6708(1)
Vibrio phage 1.219.O. 10N.261.45.E2	MG592589.1	AUR96259.1	SEC-C motif protein	6498..6708(1)
Vibrio phage 2.159.A. 10N.261.46.F12	MG592669.1	AUS02493.1	SEC-C motif protein	6498..6708(1)
Vibrio phage 2.159.B. 10N.261.46.F12	MG592670.1	AUS02543.1	SEC-C motif protein	6498..6708(1)
Vibrio phage martha 12B12	NC 021070.1	YP 007877538.1	SEC-C domain-containing protein	25639..25849(-1)
-------------
Pseudomonas phage vB_Pae_CF28a	MK511018.1	QBI81165.1	hypothetical protein	23263..23443(1)
Pseudomonas phage vB_Pae_BR327a	MK511036.1	QBI82216.1	hypothetical protein	23231..23411(1)
Pseudomonas virus DMS3	NC 008717.1	YP 950462.1	hypothetical protein	22497..22677(1)
Pseudomonas virus MP38	NC 011611.1	YP 002332350.1	hypothetical protein	22673..22853(1)
Pseudomonas phage MP42	NC 018274.1	YP 006560537.1	hypothetical protein	22929..23109(1)
Pseudomonas phage JBD30	NC 020198.1	YP 007392350.1	hypothetical protein	22968..23148(1)
Pseudomonas phage JBD24	NC 020203.1	YP 007392808.1	hypothetical protein	23081..23261(1)
Pseudomonas phage MP48	NC 024782.1	YP 009055265.1	hypothetical protein	22785..22965(1)
Pseudomonas phage vB_PaeS_PAO1_Ab30	NC 026601.1	YP 009125685.1	hypothetical protein	23236..23416(1)
Pseudomonas phage JBD69	NC 030908.1	YP 009273669.1	hypothetical protein	22951..23131(1)
-------------
Pseudomonas phage JBD16C	KU199707.1	AMD42513.1	hypothetical protein	8304..8601(1)
Pseudomonas phage vB_PaeS_PcyII-40 PfII40a	LT608331.1	SCM61966.1	hypothetical protein	8907..9204(1)
Pseudomonas phage vB_Pae_CF28a	MK511018.1	QBI81139.1	hypothetical protein	9417..9714(1)
Pseudomonas phage vB_Pae_BR327a	MK511036.1	QBI82190.1	hypothetical protein	9385..9682(1)
Pseudomonas virus MP22	NC 009818.1	YP 001469144.1	hypothetical protein	8386..8683(1)
Pseudomonas phage JBD30	NC 020198.1	YP 007392326.1	hypothetical protein	9465..9762(1)
Pseudomonas phage JBD88a	NC 020200.1	YP 007392424.1	hypothetical protein	8375..8672(1)
Pseudomonas phage vB_PaeS_PAO1_Ab30	NC 026601.1	YP 009125658.1	hypothetical protein	9390..9687(1)
Pseudomonas phage JBD93	NC 030918.1	YP 009274606.1	hypothetical protein	8914..9211(1)
Pseudomonas virus FHA0480	NC 041851.1	YP 009591704.1	hypothetical protein	9297..9594(1)
-------------
Vibrio phage 1.028.O. 10N.286.45.B6	MG592412.1	AUR82792.1	hypothetical protein	5900..6113(1)
Vibrio phage 1.136.O. 10N.261.45.E11	MG592507.1	AUR90013.1	coil containing protein	5900..6113(1)
Vibrio phage 1.142.O. 10N.261.49.E11	MG592513.1	AUR90331.1	hypothetical protein	5900..6113(1)
Vibrio phage 1.156.O. 10N.261.45.A6	MG592524.1	AUR91127.1	hypothetical protein	5900..6113(1)
Vibrio phage 1.159.O. 10N.261.46.F12	MG592527.1	AUR91308.1	hypothetical protein	5900..6113(1)
Vibrio phage 1.217.O. 10N.261.45.A1	MG592588.1	AUR96206.1	hypothetical protein	5900..6113(1)
Vibrio phage 1.219.O. 10N.261.45.E2	MG592589.1	AUR96256.1	hypothetical protein	5900..6113(1)
Vibrio phage 2.159.A. 10N.261.46.F12	MG592669.1	AUS02490.1	hypothetical protein	5900..6113(1)
Vibrio phage 2.159.B. 10N.261.46.F12	MG592670.1	AUS02540.1	hypothetical protein	5900..6113(1)
Vibrio phage martha 12B12	NC 021070.1	YP 007877542.1	ANR family transcriptional regulator	26701..26914(-1)
-------------
Escherichia virus Mu 3F6	LR595867.1	VUD37899.1	Mu-like prophage FluMu protein GP38	21696..21900(1)
Yersinia phage vB_YpM 3	MT374852.1	QKE55357.1	hypothetical protein	21344..21551(1)
Yersinia phage vB_YpM 5	MT374853.1	QKE55422.1	hypothetical protein	26691..26898(1)
Yersinia phage vB_YpM 6	MT374854.1	QKE55474.1	hypothetical protein	25315..25522(1)
Yersinia phage vB_YpM 23	MT374856.1	QKE55566.1	hypothetical protein	25246..25453(1)
Yersinia phage vB_YpM_Tongde	MT591577.1	QMP18922.1	hypothetical protein	15284..15491(-1)
Escherichia phage Mu	NC 000929.1	NP 050642.1	DUF2635 domain-containing protein	21488..21692(1)
Escherichia phage D108	NC 013594.1	YP 003335786.1	hypothetical protein	21534..21741(1)
Haemophilus phage SuMu	NC 019455.1	YP 007002945.1	hypothetical protein	22305..22485(1)
Shigella phage SfMu	NC 027382.1	YP 009152224.1	DUF2635 domain-containing protein	21906..22110(1)
-------------
Pseudomonas phage vB_Pae_CF28a	MK511018.1	QBI81129.1	hypothetical protein	6218..6854(1)
Pseudomonas phage vB_Pae_BR327a	MK511036.1	QBI82180.1	hypothetical protein	6186..6822(1)
Pseudomonas phage UMP151	MK934841.1	QDF14977.1	hypothetical protein	3546..4080(-1)
Pseudomonas virus DMS3	NC 008717.1	YP 950431.1	hypothetical protein	5636..6272(1)
Pseudomonas virus MP38	NC 011611.1	YP 002332321.1	hypothetical protein	6158..6734(1)
Pseudomonas phage MP42	NC 018274.1	YP 006560506.1	hypothetical protein	6121..6757(1)
Pseudomonas phage JBD30	NC 020198.1	YP 007392316.1	hypothetical protein	6159..6795(1)
Pseudomonas phage vB_PaeS_PAO1_Ab30	NC 026601.1	YP 009125648.1	hypothetical protein	6197..6827(1)
Pseudomonas phage JBD93	NC 030918.1	YP 009274596.1	hypothetical protein	5619..6255(1)
Pseudomonas virus FHA0480	NC 041851.1	YP 009591693.1	hypothetical protein	5623..6259(1)
-------------
Vibrio phage 1.028.O. 10N.286.45.B6	MG592412.1	AUR82793.1	coil containing protein	6099..6348(1)
Vibrio phage 1.136.O. 10N.261.45.E11	MG592507.1	AUR90014.1	head morphogenesis domain protein	6099..6348(1)
Vibrio phage 1.142.O. 10N.261.49.E11	MG592513.1	AUR90332.1	coil containing protein	6099..6348(1)
Vibrio phage 1.156.O. 10N.261.45.A6	MG592524.1	AUR91128.1	coil containing protein	6099..6348(1)
Vibrio phage 1.159.O. 10N.261.46.F12	MG592527.1	AUR91309.1	coil containing protein	6099..6348(1)
Vibrio phage 1.217.O. 10N.261.45.A1	MG592588.1	AUR96207.1	coil containing protein	6099..6348(1)
Vibrio phage 1.219.O. 10N.261.45.E2	MG592589.1	AUR96257.1	coil containing protein	6099..6348(1)
Vibrio phage 2.159.A. 10N.261.46.F12	MG592669.1	AUS02491.1	coil containing protein	6099..6348(1)
Vibrio phage 2.159.B. 10N.261.46.F12	MG592670.1	AUS02541.1	coil containing protein	6099..6348(1)
Vibrio phage martha 12B12	NC 021070.1	YP 007877541.1	hypothetical protein	26466..26715(-1)
-------------
Vibrio phage 1.028.O. 10N.286.45.B6	MG592412.1	AUR82789.1	hypothetical protein	4620..4947(1)
Vibrio phage 1.136.O. 10N.261.45.E11	MG592507.1	AUR90010.1	hypothetical protein	4620..4947(1)
Vibrio phage 1.142.O. 10N.261.49.E11	MG592513.1	AUR90328.1	hypothetical protein	4620..4947(1)
Vibrio phage 1.156.O. 10N.261.45.A6	MG592524.1	AUR91124.1	hypothetical protein	4620..4947(1)
Vibrio phage 1.159.O. 10N.261.46.F12	MG592527.1	AUR91305.1	hypothetical protein	4620..4947(1)
Vibrio phage 1.217.O. 10N.261.45.A1	MG592588.1	AUR96203.1	hypothetical protein	4620..4947(1)
Vibrio phage 1.219.O. 10N.261.45.E2	MG592589.1	AUR96253.1	hypothetical protein	4620..4947(1)
Vibrio phage 2.159.A. 10N.261.46.F12	MG592669.1	AUS02487.1	hypothetical protein	4620..4947(1)
Vibrio phage 2.159.B. 10N.261.46.F12	MG592670.1	AUS02537.1	hypothetical protein	4620..4947(1)
vB_SspM_MuM16-2	MZ568828	MuM16-2_p44	hypothetical protein	28674..28995(-1)

## Sheet: Table S9
Table S9. List of strains used in this study. All the strains are included in the collection of microorganisms of the Institute of Microbiology at the University of Warsaw (Poland).
Strain	Source of isolation	Use in this study	Source/ References
Aeromonas sp. MR7	gold and arsenic mine	as a potential host for phages	this work
Aeromonas sp. MR16	gold and arsenic mine	as a potential host for phages	this work
Aeromonas sp. MR19	gold and arsenic mine	as a potential host for phages	this work
Escherichia coli TOP10F’	laboratory strain	host strain for gene cloning	Invitrogen, Waltham, MA, USA
Escherichia coli ER2566	laboratory strain	host strain for gene expression	New England BioLabs, Ipswich, MA
Escherichia coli ER2929 Dam-	laboratory strain	host strain for gene expression	[67]
Pseudomonas sp. WM9	gold and arsenic mine	as a potential host for phages	this work
Serratia sp. OS31	gold and arsenic mine	as a potential host for phages	[68]
Shewanella oneidensis MR-1	lake sediments	as a potential host for phages	[69]
Shewanella baltica OS155	sea water	as a potential host for phages	[70]
Shewanella sp. M15	gold and arsenic mine	as a potential host for phages	this work
Shewanella sp. M16	gold and arsenic mine	host strain for KASIA	this work
Shewanella sp. O23S	gold and arsenic mine	as a potential host for phages	[71]
Shewanella sp. ZGL8	gold and arsenic mine	as a potential host for phages	this work
Shewanella sp. ZGL10	gold and arsenic mine	as a potential host for phages	this work
Shewanella sp. ZGL11	gold and arsenic mine	as a potential host for phages	this work
Stenotrophomonas sp. GZS7	gold and arsenic mine	as a potential host for phages	this work
Stenotrophomonas sp. GZS9	gold and arsenic mine	as a potential host for phages	this work

## Sheet: TableS10
Table S10. Oligonucleotide primers used in this study.
Name of the primer	Primer sequence (5’→3’)	Restriction site created and used for cloning	Plasmid vector and restriction sites used for cloning	Name of the construct
KASIA_Pol1	TCACCCGTAATTGGGCAATC	-	-	-
KASIA_Pol2	TGTTCGCTCAACCCATAGTG	-	-	-
KASIA_Pol3	AGGCGAATTGATCACGACAG	-	-	-
KASIA_Pol5	GAGTGGCCTGAAGATTCTGG	-	-	-
KASIA_Ter1	AATGCACTGGCGAGAAAGAC	-	-	-
KASIA_Ter2	CATGTTGGTTCGTCCCATAC	-	-	-
KASIA_Ter3	GGCATTACGTGCTGGGAGAG	-	-	-
KASIA_Ter5	TGCAGCAGCAACACCTTCAC	-	-	-
M16_3_1	TATCGCAACGCGCTACTTAC	-	-	-
M16_3_2	ATAAGGCGCCATGAATTCGG	-	-	-
M16_3_3	TTGTAAGCGCCGCAATTCTC	-	-	-
M16_3_4	TGCCTCACCACGTCAAGTAG	-	-	-
M16_3_5	ATGAGGTCTGAGCCCATAAG	-	-	-
M16_3_6	CCTAAAGTCGGAGACATAGC	-	-	-
MMZS2F	GTTGTTCATATGGTGGGTACTCTTATGCC	NdeI	NdeI/XhoI-digested pET30a	pET_KASIAp114
MMZS2R	GTTGTTCTCGAGATTGTAAATGAATGCCTCAAAC	XhoI	NdeI/XhoI-digested pET30a	pET_KASIAp114

[truncated: 1 more sheets: References]
